# Supplementary material for: Caring for trafficked and unidentified patients in the EHR shadows: Shining a light by sharing the data
Source: PLoS One. 2019 Mar 14;14(3):e0213766. doi: 10.1371/journal.pone.0213766 (PMC6417704; doi:10.1371/journal.pone.0213766)
Supplement: S2 Data — (XLSX) [file pone.0213766.s017.xlsx]

## Sheet: Sheet
I can define “human trafficking.”	I can identify multiple types of human trafficking.	I know where human trafficking occurs.	I am aware of the extent of human trafficking occurring in my state.	I am aware of the extent of human trafficking occurring worldwide.	I understand the physical health consequences of human trafficking.	I understand the psychological health consequences of human trafficking.	I know the warning signs or indicators that a patient is a trafficked person.	I know how to communicate effectively with a patient suspected of being a trafficked person.	I know how to provide trauma-informed medical care for a patient suspected of being a trafficked person.	I know how to provide culturally-sensitive medical care for a patient suspected of being a trafficked person.	I know where trafficked persons can obtain housing assistance.	I know where trafficked persons can obtain legal assistance.	I know where trafficked persons can obtain immigration assistance.	I know where trafficked persons can obtain employment assistance.	I know where trafficked persons can obtain food assistance.	I know how to refer trafficked persons to non-medical services (such as housing, legal, immigration, employment, and food assistance resources).	I understand the medical record documentation issues related to caring for a patient suspected of being a trafficked person.	I understand the confidentiality issues related to caring for a patient suspected of being a trafficked person.	I understand the law enforcement reporting issues related to caring for a patient suspected of being a trafficked person.	I know how to ensure my own security and safety as a healthcare provider of a trafficked person.	I know how to ensure my patient’s security and safety when I suspect or know the patient is a trafficked person.	I understand the role of healthcare professionals in the prevention of human trafficking.	Referrals to non-medical services (such as housing, employment, immigration, food, or legal services) are not a healthcare professional’s responsibility.	Human trafficking is not a problem in the geographic area where I work as a healthcare professional.	Continuity of care is an acute problem for trafficked persons.	There should be a specific ICD code for use when a patient is suspected or confirmed as a trafficked person.	The use of biometric tools (like palm readers, fingerprinting, and retinal or iris scans) would improve patient safety.	The use of DNA identifiers (or other biomarkers) would improve the continuity of care for trafficked persons.	My current institution has trained adequately its healthcare providers to care for patients who are trafficked persons.	While working at my current institution, I have encountered a patient whom I suspected or knew was a trafficked person.	Within the last three years, I have attended training (such as an in-person or online course) related to human trafficking and healthcare.	I want to learn more about identification, intervention, and prevention of human trafficking.	Which of the following best describes your role as a health care professional? Response	If other, please describe your role.	In which department do you primarily work? Response	If other, please specify your department.	What is the zip code for the place where you primarily work as a health care professional? Open-Ended Response [RESPONSES REDACTED TO THREE DIGITS]	How many years have you worked as a health care professional? Response	In which age group do you belong? Response	What is the highest grade or year of school you completed? Response	Which of the following best describes the area in which you live? Response	Were you born in the USA? Response	Which categories describe you? Select all that apply. Note, you may select more than one group. Response	[Race, Ethnicity] If none of these, please specify.	What term best expresses how you describe your gender identity? Response	[Gender Identity] If none of these, please specify.
Confident	Hesitant	Hesitant	Not Confident	Hesitant	Confident	Hesitant	Not Confident	Not Confident	Not Confident	Not Confident	Not Confident	Not Confident	Not Confident	Not Confident	Not Confident	Not Confident	Not Confident	Not Confident	Not Confident	Not Confident	Not Confident	Not Confident	Disagree	Disagree	Agree	Agree	Disagree	Agree	Strongly Disagree	Strongly Disagree	Strongly Disagree	Disagree	Physician		Pediatrics		170	10-19 years	36 to 45 years old	Advanced degree (Master's, Doctorate, etc.)	Suburban	Yes	White, European American, or European		Woman
Confident	Confident	Hesitant	Not Confident	Confident	Very Confident	Confident	Hesitant	Hesitant	Not Confident	Not Confident	Not Confident	Not Confident	Not Confident	Not Confident	Not Confident	Not Confident	Not Confident	Very Confident	Not Confident	Not Confident	Not Confident	Not Confident	Strongly Disagree	Disagree	Strongly Agree	Strongly Agree	Agree	Agree	Strongly Disagree	Strongly Disagree	Strongly Disagree	Agree	Physician		Other	Hospitalist medicine; administration	170	30 years or more	56 to 65 years old	Advanced degree (Master's, Doctorate, etc.)	Rural	Yes	White, European American, or European		Man
Confident	Confident	Hesitant	Not Confident	Confident	Confident	Very Confident	Hesitant	Hesitant	Hesitant	Confident	Not Confident	Not Confident	Not Confident	Not Confident	Not Confident	Not Confident	Not Confident	Hesitant	Hesitant	Hesitant	Confident	Hesitant	Disagree	Agree	Agree	Strongly Agree	Agree	Agree	Strongly Disagree	Strongly Disagree	Strongly Disagree	Strongly Agree	Physician		Pediatrics			Fewer than 10 years	26 to 35 years old	Advanced degree (Master's, Doctorate, etc.)	Suburban	Yes	White, European American, or European		Woman
Confident	Confident	Confident	Confident	Confident	Confident	Confident	Confident	Not Confident	Not Confident	Not Confident	Not Confident	Not Confident	Not Confident	Not Confident	Not Confident	Not Confident	Not Confident	Not Confident	Not Confident	Not Confident	Not Confident	Not Confident	Strongly Disagree	Strongly Disagree	Strongly Agree	Disagree	Agree	Agree	Disagree	Disagree	Strongly Disagree	Strongly Agree	Other	Laboratory Medicine	Other	Laboratory Medicine	178	30 years or more	56 to 65 years old	Advanced degree (Master's, Doctorate, etc.)	Rural	Yes	White, European American, or European		Woman
Hesitant	Hesitant	Hesitant	Not Confident	Confident	Hesitant	Hesitant	Hesitant	Hesitant	Not Confident	Not Confident	Not Confident	Not Confident	Not Confident	Not Confident	Not Confident	Not Confident	Not Confident	Confident	Hesitant	Not Confident	Not Confident	Hesitant	Agree	Agree	Agree	Disagree	Disagree	Agree	Disagree	Strongly Disagree	Disagree	Agree	Physician		Prefer not to answer.		178	20-29 years	46 to 55 years old	Advanced degree (Master's, Doctorate, etc.)	Rural	Yes	Prefer not to answer.		Prefer not to answer.
Hesitant	Hesitant	Very Confident	Not Confident	Hesitant	Confident	Hesitant	Hesitant	Hesitant	Hesitant	Hesitant	Confident	Confident	Confident	Confident	Confident	Confident	Hesitant	Hesitant	Confident	Confident	Hesitant	Hesitant	Disagree	Disagree	Agree	Agree	Agree	Agree	Disagree	Strongly Disagree	Disagree	Agree	Physician		Other	Radiation Oncology	178	Fewer than 10 years	26 to 35 years old	Advanced degree (Master's, Doctorate, etc.)	Rural	No	White, European American, or European		Man
Confident	Confident	Hesitant	Hesitant	Hesitant	Confident	Very Confident	Hesitant	Confident	Confident	Confident	Confident	Confident	Hesitant	Confident	Confident	Confident	Not Confident	Not Confident	Not Confident	Not Confident	Hesitant	Hesitant	Strongly Disagree	Disagree	Agree	Disagree	Disagree	Agree	Disagree	Strongly Agree	Strongly Disagree	Agree	Other		Psychiatry			10-19 years	36 to 45 years old	Advanced degree (Master's, Doctorate, etc.)	Rural	Yes	White, European American, or European		Woman
Confident	Confident	Hesitant	Hesitant	Hesitant	Very Confident	Confident	Hesitant	Hesitant	Confident	Hesitant	Not Confident	Not Confident	Not Confident	Not Confident	Not Confident	Not Confident	Hesitant	Hesitant	Hesitant	Hesitant	Hesitant	Hesitant	Strongly Agree	Disagree	Strongly Agree	Agree	Strongly Agree	Strongly Agree	Strongly Disagree	Strongly Disagree	Strongly Disagree	Strongly Agree	Physician		Other		187	30 years or more	66 to 75 years old	Advanced degree (Master's, Doctorate, etc.)	Urban	Yes	Prefer not to answer.		Man
Confident	Hesitant	Confident	Hesitant	Hesitant	Hesitant	Confident	Hesitant	Hesitant	Hesitant	Hesitant	Hesitant	Hesitant	Hesitant	Hesitant	Hesitant	Hesitant	Hesitant	Hesitant	Hesitant	Hesitant	Hesitant	Hesitant	Disagree	Disagree	Agree	Agree	Disagree	Agree	Strongly Disagree	Disagree	Disagree	Agree	Physician		Other	surgery/trauma	185	Fewer than 10 years	26 to 35 years old	Advanced degree (Master's, Doctorate, etc.)	Suburban	Yes	White, European American, or European		Man
Confident	Confident	Not Confident	Hesitant	Hesitant	Confident	Hesitant	Hesitant	Hesitant	Hesitant	Hesitant	Not Confident	Not Confident	Not Confident	Not Confident	Not Confident	Not Confident	Not Confident	Hesitant	Hesitant	Hesitant	Hesitant	Hesitant	Strongly Disagree	Disagree	Agree	Agree	Agree	Agree	Agree	Disagree	Strongly Disagree	Agree	Physician		Other	surgery	168	20-29 years	56 to 65 years old	Advanced degree (Master's, Doctorate, etc.)	Suburban	Yes	White, European American, or European		Man
Not Confident	Not Confident	Not Confident	Not Confident	Not Confident	Not Confident	Hesitant	Not Confident	Not Confident	Not Confident	Not Confident	Not Confident	Not Confident	Not Confident	Not Confident	Not Confident	Not Confident	Not Confident	Not Confident	Not Confident	Not Confident	Not Confident	Not Confident	Disagree	Agree	Agree	Agree	Agree	Agree	Disagree	Disagree	Strongly Disagree	Agree	Physician		Other	Dermatology	178	10-19 years	36 to 45 years old	Advanced degree (Master's, Doctorate, etc.)	Rural	Yes	White, European American, or European		Man
Very Confident	Confident	Not Confident	Hesitant	Confident	Confident	Confident		Hesitant	Hesitant	Hesitant	Hesitant	Hesitant	Hesitant	Hesitant	Hesitant	Hesitant	Confident	Confident	Hesitant	Confident	Confident	Hesitant	Disagree	Disagree	Agree	Agree	Agree	Agree	Strongly Disagree	Strongly Disagree	Strongly Disagree	Disagree	Physician		Other	Subspecialty care	178	30 years or more	56 to 65 years old	Advanced degree (Master's, Doctorate, etc.)	Rural	Yes	White, European American, or European		Man
Hesitant	Not Confident	Not Confident	Not Confident	Not Confident	Not Confident	Not Confident	Not Confident	Not Confident	Not Confident	Not Confident	Not Confident	Not Confident	Not Confident	Not Confident	Not Confident	Not Confident	Not Confident	Not Confident	Not Confident	Not Confident	Not Confident	Not Confident	Agree	Strongly Disagree	Strongly Agree	Strongly Agree	Disagree	Disagree	Strongly Disagree	Agree	Strongly Disagree	Agree	Physician		Pediatrics		178	20-29 years	36 to 45 years old	Advanced degree (Master's, Doctorate, etc.)	Rural	No	None of these fully describe me.		Woman
Hesitant	Not Confident	Hesitant	Not Confident	Hesitant	Confident	Confident	Not Confident	Not Confident	Hesitant	Not Confident	Not Confident	Not Confident	Not Confident	Not Confident	Not Confident	Not Confident	Not Confident	Confident	Not Confident	Not Confident	Not Confident	Hesitant	Strongly Disagree	Strongly Disagree	Agree	Agree	Strongly Agree	Strongly Agree	Disagree	Strongly Disagree	Strongly Disagree	Agree	Physician		Other	pulmonary	178	30 years or more	56 to 65 years old	Advanced degree (Master's, Doctorate, etc.)	Rural	Yes	White, European American, or European		Man
Confident	Confident	Hesitant	Hesitant	Hesitant	Confident	Confident	Hesitant	Hesitant	Hesitant	Hesitant	Hesitant	Hesitant	Hesitant	Hesitant	Hesitant	Hesitant	Hesitant	Hesitant	Hesitant	Hesitant	Hesitant	Hesitant	Disagree	Disagree	Agree	Agree	Disagree	Disagree	Disagree	Disagree	Disagree	Strongly Agree	Physician		Pediatrics		179	Fewer than 10 years	26 to 35 years old	Advanced degree (Master's, Doctorate, etc.)	Rural	Yes	White, European American, or European		Woman
Confident	Hesitant	Hesitant	Hesitant	Hesitant	Confident	Confident	Hesitant	Hesitant	Confident	Hesitant	Not Confident	Not Confident	Not Confident	Not Confident	Not Confident	Not Confident	Hesitant	Confident	Hesitant	Hesitant	Hesitant	Hesitant	Disagree	Agree	Agree	Agree	Agree	Agree	Disagree	Strongly Disagree	Strongly Disagree	Agree	Physician		Other	outpatient plastic surgery	171	20-29 years	56 to 65 years old	Advanced degree (Master's, Doctorate, etc.)	Suburban	Yes	White, European American, or European		Man
Not Confident	Not Confident	Not Confident	Very Confident	Very Confident		Not Confident	Not Confident	Not Confident	Not Confident	Not Confident	Not Confident	Not Confident	Not Confident	Not Confident	Not Confident	Not Confident	Not Confident	Not Confident	Not Confident	Not Confident	Not Confident	Not Confident	Strongly Disagree	Strongly Disagree	Agree	Agree	Agree	Agree	Agree	Disagree	Strongly Disagree	Strongly Disagree		not a health care provider (research PhD)	Other	education	.	Prefer not to answer.	36 to 45 years old	Advanced degree (Master's, Doctorate, etc.)	Urban	Yes	White, European American, or European		Man
Very Confident	Very Confident	Very Confident	Hesitant	Hesitant	Confident	Hesitant	Not Confident	Hesitant	Not Confident	Not Confident	Not Confident	Not Confident	Not Confident	Not Confident	Not Confident	Not Confident	Not Confident	Hesitant	Hesitant	Not Confident	Not Confident	Not Confident	Disagree	Agree	Agree	Strongly Disagree	Strongly Disagree	Strongly Disagree	Disagree	Strongly Disagree	Strongly Disagree	Strongly Disagree	Physician		Other		179	30 years or more	66 to 75 years old	Advanced degree (Master's, Doctorate, etc.)	Rural	Yes	White, European American, or European		Man
Confident	Hesitant	Not Confident	Not Confident	Not Confident	Hesitant	Hesitant	Not Confident	Not Confident	Not Confident	Not Confident	Not Confident	Not Confident	Not Confident	Not Confident	Not Confident	Not Confident	Not Confident	Not Confident	Not Confident	Not Confident	Not Confident	Not Confident	Strongly Disagree	Strongly Disagree	Strongly Agree	Strongly Agree	Strongly Agree	Strongly Agree	Strongly Disagree	Strongly Disagree	Strongly Disagree	Strongly Agree	Physician		Pediatrics		178	Fewer than 10 years	26 to 35 years old	Advanced degree (Master's, Doctorate, etc.)	Rural	Yes	White, European American, or European		Woman
Hesitant	Not Confident	Not Confident	Not Confident	Not Confident	Not Confident	Not Confident	Not Confident	Not Confident	Not Confident	Not Confident	Not Confident	Not Confident	Not Confident	Not Confident	Not Confident	Not Confident	Not Confident	Not Confident	Not Confident	Not Confident	Not Confident	Not Confident	Strongly Disagree	Strongly Disagree	Agree	Agree	Agree	Agree	Disagree	Strongly Disagree	Strongly Disagree	Agree	Physician		Other	Palliative care	187	10-19 years	46 to 55 years old	Advanced degree (Master's, Doctorate, etc.)	Suburban	No	Black, African American, or African		Man
Very Confident	Very Confident	Confident	Not Confident	Not Confident	Confident	Very Confident	Not Confident	Not Confident	Not Confident	Hesitant	Not Confident	Not Confident	Not Confident	Not Confident	Not Confident	Not Confident	Not Confident	Confident	Not Confident	Hesitant	Confident	Not Confident	Disagree	Agree	Strongly Agree	Agree	Strongly Agree	Disagree	Disagree	Disagree	Disagree	Disagree	Physician		Other	IM	178	20-29 years	46 to 55 years old	Advanced degree (Master's, Doctorate, etc.)	Rural	Yes	White, European American, or European		Man
Confident	Hesitant	Hesitant	Not Confident	Hesitant	Hesitant	Hesitant	Not Confident	Not Confident	Not Confident	Not Confident	Not Confident	Not Confident	Not Confident	Not Confident	Not Confident	Not Confident	Not Confident	Not Confident	Not Confident	Not Confident	Not Confident	Not Confident	Disagree	Agree	Agree	Agree	Agree	Agree	Strongly Disagree	Strongly Disagree	Strongly Disagree	Disagree	Physician		Other	urology	178	20-29 years	56 to 65 years old	Advanced degree (Master's, Doctorate, etc.)	Rural	Yes	White, European American, or European		Man
Hesitant	Hesitant	Hesitant	Not Confident	Hesitant	Hesitant	Hesitant	Hesitant	Not Confident	Not Confident	Not Confident	Not Confident	Not Confident	Not Confident	Not Confident	Not Confident	Not Confident	Not Confident	Hesitant	Not Confident	Not Confident	Not Confident	Not Confident	Disagree	Disagree	Agree	Disagree	Agree	Agree	Strongly Disagree	Strongly Agree	Disagree	Strongly Agree	Physician		OB/GYN		178	Fewer than 10 years	26 to 35 years old	Advanced degree (Master's, Doctorate, etc.)	Rural	Yes	White, European American, or European		Woman
Confident	Confident	Not Confident	Not Confident	Not Confident	Confident	Confident	Not Confident	Not Confident	Not Confident	Not Confident	Not Confident	Not Confident	Not Confident	Not Confident	Not Confident	Not Confident	Not Confident	Not Confident	Not Confident	Not Confident	Not Confident	Not Confident	Strongly Agree	Disagree	Agree	Disagree	Disagree	Disagree	Disagree	Disagree	Disagree	Strongly Disagree	Physician		Other	OR	178	20-29 years	56 to 65 years old	Advanced degree (Master's, Doctorate, etc.)	Rural	Yes	White, European American, or European		Man
Confident	Confident	Hesitant	Hesitant	Confident	Confident	Hesitant	Hesitant	Confident	Hesitant	Confident	Hesitant	Hesitant	Hesitant	Not Confident	Hesitant	Hesitant	Not Confident	Confident	Not Confident	Very Confident	Confident	Confident	Strongly Disagree	Disagree	Strongly Agree	Agree	Disagree	Disagree	Agree	Strongly Disagree	Agree	Agree	Physician		Other		178	20-29 years	Prefer not to answer.	Advanced degree (Master's, Doctorate, etc.)	Rural	Yes	White, European American, or European		Man
Hesitant	Hesitant	Not Confident	Confident	Confident	Hesitant	Hesitant	Hesitant	Not Confident	Not Confident	Hesitant	Not Confident	Not Confident	Not Confident	Not Confident	Not Confident	Not Confident	Not Confident	Confident	Confident	Confident	Hesitant	Confident	Strongly Disagree	Strongly Disagree	Agree	Agree	Agree	Agree	Disagree	Disagree	Strongly Disagree	Agree	Nurse		Other	med/surg	.	Fewer than 10 years	26 to 35 years old	1 to 3 years after high school (some college, Associate's degree, or technical school)	Suburban	Yes	White, European American, or European		Woman
Confident	Confident	Confident	Hesitant	Hesitant	Hesitant	Confident	Hesitant	Hesitant	Hesitant	Hesitant	Hesitant	Hesitant	Hesitant	Hesitant	Hesitant	Hesitant	Hesitant	Hesitant	Hesitant	Hesitant	Hesitant	Hesitant	Agree	Disagree	Agree	Disagree	Agree	Agree	Disagree	Disagree	Disagree	Agree	Nurse			neurosurgery	187	Fewer than 10 years	36 to 45 years old	Advanced degree (Master's, Doctorate, etc.)	Rural	Yes	White, European American, or European		Woman
Not Confident	Not Confident	Not Confident	Not Confident	Not Confident	Not Confident	Not Confident	Not Confident	Not Confident	Not Confident	Not Confident	Not Confident	Not Confident	Not Confident	Not Confident	Not Confident	Not Confident	Not Confident	Not Confident	Not Confident	Not Confident	Not Confident	Not Confident	Strongly Disagree	Agree	Agree	Agree	Agree	Agree	Strongly Disagree	Strongly Disagree	Strongly Disagree	Strongly Agree	Nurse		Other	Hospital Wide Education	187	10-19 years	36 to 45 years old	Advanced degree (Master's, Doctorate, etc.)	Rural	Yes	White, European American, or European		Woman
Confident	Confident	Confident	Hesitant	Confident	Confident	Confident	Hesitant	Hesitant	Confident	Hesitant	Not Confident	Not Confident	Not Confident	Not Confident	Not Confident	Hesitant	Hesitant	Confident	Confident	Hesitant	Confident	Hesitant	Disagree	Strongly Disagree	Agree	Strongly Agree	Agree	Agree	Disagree	Disagree	Strongly Disagree	Agree	Physician		Other	Community medicine	168	20-29 years	56 to 65 years old	Advanced degree (Master's, Doctorate, etc.)	Suburban	Yes	Prefer not to answer.		Man
Hesitant	Not Confident	Hesitant	Confident	Confident	Confident	Confident	Not Confident	Not Confident	Not Confident	Not Confident	Not Confident	Not Confident	Not Confident	Not Confident	Not Confident	Not Confident	Not Confident	Not Confident	Not Confident	Not Confident	Not Confident	Not Confident	Strongly Disagree	Strongly Disagree	Strongly Agree	Agree	Agree	Agree	Disagree	Strongly Disagree	Strongly Disagree	Strongly Agree	Nurse		Other	family practice	178	10-19 years	26 to 35 years old	1 to 3 years after high school (some college, Associate's degree, or technical school)	Rural	Yes	White, European American, or European		Woman
Confident	Hesitant	Hesitant	Not Confident	Not Confident	Confident	Confident	Not Confident	Not Confident	Not Confident	Hesitant	Not Confident	Not Confident	Not Confident	Not Confident	Not Confident	Not Confident	Not Confident	Confident	Not Confident	Not Confident	Not Confident	Not Confident	Disagree	Disagree	Agree	Agree	Agree	Agree	Strongly Disagree	Disagree	Strongly Disagree	Agree	Nurse		Other	Cardiology	170	Fewer than 10 years	56 to 65 years old	College 4 years or more (college graduate)	Rural	Yes	White, European American, or European		Woman
Confident	Hesitant	Hesitant	Not Confident	Hesitant	Confident	Confident	Not Confident	Hesitant	Not Confident	Hesitant	Hesitant	Hesitant	Not Confident	Not Confident	Not Confident	Not Confident	Not Confident	Confident	Hesitant	Not Confident	Hesitant	Not Confident
Confident	Hesitant	Hesitant	Hesitant	Hesitant	Confident	Confident	Hesitant	Hesitant	Not Confident	Hesitant	Hesitant	Hesitant	Hesitant	Hesitant	Hesitant	Hesitant	Not Confident	Confident	Hesitant	Hesitant	Hesitant	Hesitant	Strongly Disagree	Disagree	Agree	Agree	Agree	Agree	Disagree	Disagree	Disagree	Agree	Nurse		Other	care management	178	10-19 years	26 to 35 years old	Advanced degree (Master's, Doctorate, etc.)	Rural	Yes	White, European American, or European		Woman
Very Confident	Very Confident	Hesitant	Hesitant	Confident	Very Confident	Very Confident	Confident	Hesitant	Confident	Hesitant	Confident	Confident	Hesitant	Confident	Confident	Confident	Hesitant	Confident	Confident	Confident	Hesitant	Confident	Disagree	Disagree	Agree	Agree	Disagree	Agree	Disagree	Disagree	Disagree	Agree	Nurse		Pediatrics		178	30 years or more	46 to 55 years old	Advanced degree (Master's, Doctorate, etc.)	Rural	Yes	White, European American, or European		Woman
Confident	Confident	Hesitant	Hesitant	Confident	Confident	Confident	Hesitant	Hesitant	Hesitant	Hesitant	Confident	Confident	Hesitant	Hesitant	Confident	Confident	Confident	Confident	Confident	Confident	Confident	Hesitant	Disagree	Disagree	Strongly Agree	Agree	Agree	Agree	Strongly Disagree	Disagree	Strongly Disagree	Agree	Nurse		Other	Pharmacy	178	20-29 years	46 to 55 years old	College 4 years or more (college graduate)	Rural	Yes	White, European American, or European		Woman
Confident	Hesitant	Confident	Not Confident	Hesitant	Hesitant	Hesitant	Not Confident	Not Confident	Not Confident	Not Confident	Not Confident	Not Confident	Not Confident	Not Confident	Not Confident	Not Confident	Not Confident	Not Confident	Not Confident	Not Confident	Not Confident	Hesitant	Strongly Disagree	Strongly Disagree	Strongly Agree	Disagree	Agree	Agree	Strongly Disagree	Strongly Disagree	Strongly Disagree	Agree	Nurse		Other	Cardiology	.	10-19 years	36 to 45 years old	College 4 years or more (college graduate)	Rural	Yes	White, European American, or European		Woman
Confident	Hesitant	Hesitant	Hesitant	Hesitant	Hesitant	Confident	Hesitant	Hesitant	Hesitant	Hesitant	Hesitant	Hesitant	Hesitant	Hesitant	Hesitant	Hesitant	Hesitant	Hesitant	Hesitant	Hesitant	Hesitant	Hesitant	Disagree	Disagree	Agree	Disagree	Agree	Agree	Strongly Disagree	Strongly Disagree	Strongly Disagree	Agree	Nurse		Pediatrics		178	10-19 years	36 to 45 years old	College 4 years or more (college graduate)	Rural	Yes	White, European American, or European		Woman
Hesitant	Hesitant	Not Confident	Not Confident	Not Confident	Confident	Confident	Hesitant	Not Confident	Not Confident	Not Confident	Not Confident	Not Confident	Not Confident	Not Confident	Confident	Hesitant	Not Confident	Hesitant	Not Confident	Not Confident	Not Confident	Not Confident	Strongly Disagree	Disagree	Strongly Agree	Agree	Agree	Agree	Disagree	Disagree	Strongly Disagree	Strongly Agree	Nurse		Other	Maternal/Child home care	170	20-29 years	66 to 75 years old	1 to 3 years after high school (some college, Associate's degree, or technical school)	Rural	Yes	White, European American, or European		Woman
Hesitant	Hesitant	Hesitant	Hesitant	Hesitant	Hesitant	Hesitant	Not Confident	Not Confident	Not Confident	Not Confident	Not Confident	Not Confident	Not Confident	Not Confident	Not Confident	Not Confident	Not Confident	Not Confident	Not Confident	Hesitant	Not Confident	Not Confident	Disagree	Agree	Agree	Agree	Agree	Agree	Disagree	Disagree	Disagree	Disagree	Nurse		Other		178	20-29 years	46 to 55 years old	College 4 years or more (college graduate)	Rural	Yes	White, European American, or European		Woman
Hesitant	Not Confident	Not Confident	Not Confident	Not Confident	Not Confident	Not Confident	Not Confident	Not Confident	Not Confident	Not Confident	Not Confident	Not Confident	Not Confident	Not Confident	Not Confident	Not Confident	Not Confident	Not Confident	Not Confident	Not Confident	Not Confident	Not Confident	Strongly Disagree	Disagree	Strongly Agree	Agree	Agree	Agree	Strongly Disagree	Strongly Disagree	Strongly Disagree	Agree	Nurse		Other	Quality	170	30 years or more	46 to 55 years old	College 4 years or more (college graduate)	Suburban	Yes	White, European American, or European		Woman
Confident	Hesitant	Not Confident	Not Confident	Hesitant	Hesitant	Hesitant	Not Confident	Not Confident	Not Confident	Not Confident	Not Confident	Not Confident	Not Confident	Not Confident	Not Confident	Not Confident	Not Confident	Not Confident	Not Confident	Not Confident	Not Confident	Not Confident	Disagree	Agree	Agree	Strongly Agree	Agree	Agree	Disagree	Strongly Disagree	Strongly Disagree	Disagree	Prefer not to answer		Other		178	Prefer not to answer.	Prefer not to answer.		Rural		Prefer not to answer.		Prefer not to answer.
Hesitant	Hesitant	Not Confident	Not Confident	Not Confident	Not Confident	Not Confident	Not Confident	Not Confident	Not Confident	Not Confident	Not Confident	Not Confident	Not Confident	Not Confident	Not Confident	Not Confident	Not Confident	Not Confident	Not Confident	Not Confident	Not Confident	Not Confident	Disagree	Strongly Disagree	Strongly Agree	Agree	Strongly Agree	Agree	Strongly Disagree	Strongly Disagree	Strongly Disagree	Strongly Agree	Nurse		Other		178	10-19 years	36 to 45 years old	College 4 years or more (college graduate)	Rural	Yes	White, European American, or European		Woman
Hesitant	Hesitant	Not Confident	Not Confident	Hesitant	Hesitant	Hesitant	Not Confident	Not Confident	Not Confident	Not Confident	Not Confident	Not Confident	Not Confident	Not Confident	Not Confident	Not Confident	Not Confident	Not Confident	Not Confident	Not Confident	Not Confident	Not Confident	Disagree	Disagree	Agree	Agree	Disagree	Agree	Strongly Disagree	Strongly Disagree	Strongly Disagree	Strongly Agree	Nurse		Other	med surg		30 years or more	56 to 65 years old	College 4 years or more (college graduate)	Rural	Yes	White, European American, or European		Woman
Confident	Confident	Hesitant	Not Confident	Not Confident	Hesitant	Hesitant	Hesitant	Hesitant	Not Confident	Hesitant	Not Confident	Not Confident	Not Confident	Not Confident	Not Confident	Not Confident	Not Confident	Not Confident	Not Confident	Hesitant	Hesitant	Hesitant	Strongly Disagree	Disagree	Strongly Agree	Disagree	Disagree	Disagree	Disagree	Disagree	Agree	Strongly Agree	Nurse		Other	office practice		30 years or more	56 to 65 years old	College 4 years or more (college graduate)	Rural	Yes	White, European American, or European		Woman
Hesitant	Not Confident	Hesitant	Not Confident	Not Confident	Hesitant	Hesitant	Hesitant	Not Confident	Not Confident	Hesitant	Not Confident	Not Confident	Not Confident	Not Confident	Not Confident	Not Confident	Not Confident	Hesitant	Hesitant	Hesitant	Hesitant	Not Confident	Strongly Disagree	Strongly Disagree	Agree	Agree	Agree	Agree	Disagree	Disagree	Disagree	Strongly Agree	Nurse		Other	Outpatient clinic		20-29 years	46 to 55 years old	College 4 years or more (college graduate)	Rural	Yes	White, European American, or European		Woman
Confident	Confident	Hesitant	Hesitant	Hesitant	Confident	Confident	Hesitant	Hesitant	Hesitant	Hesitant	Not Confident	Not Confident	Not Confident	Not Confident	Not Confident		Hesitant	Hesitant	Hesitant	Hesitant	Hesitant	Confident	Strongly Disagree	Strongly Disagree	Agree	Agree	Agree	Agree	Disagree	Disagree	Disagree	Agree	Physician		Prefer not to answer.		187	Prefer not to answer.	Prefer not to answer.	Advanced degree (Master's, Doctorate, etc.)	Prefer not to answer.	Prefer not to answer	Prefer not to answer.		Prefer not to answer.
Confident	Confident	Not Confident	Not Confident	Hesitant	Hesitant	Hesitant	Not Confident	Not Confident	Not Confident	Not Confident	Not Confident	Not Confident	Not Confident	Not Confident	Not Confident	Not Confident	Not Confident	Hesitant	Not Confident	Not Confident	Not Confident	Not Confident	Disagree	Disagree	Agree	Agree	Agree	Agree	Disagree	Disagree	Disagree	Agree	Nurse		Other		178	30 years or more	66 to 75 years old	1 to 3 years after high school (some college, Associate's degree, or technical school)	Rural	Yes	White, European American, or European		Woman
Confident	Not Confident	Hesitant	Not Confident	Not Confident	Hesitant	Not Confident	Not Confident	Not Confident	Not Confident	Not Confident	Not Confident	Not Confident	Not Confident	Not Confident	Not Confident	Not Confident	Not Confident	Not Confident	Not Confident	Not Confident	Not Confident	Not Confident	Strongly Disagree	Strongly Disagree	Agree	Disagree	Disagree	Disagree	Strongly Disagree	Disagree	Strongly Disagree	Agree	Nurse		Other		170	Fewer than 10 years	46 to 55 years old	Advanced degree (Master's, Doctorate, etc.)	Suburban	Yes	White, European American, or European		Woman
Confident	Confident	Confident	Confident	Confident	Confident	Confident	Hesitant	Confident	Confident	Confident	Hesitant	Hesitant	Hesitant	Hesitant	Hesitant	Hesitant	Confident	Confident	Confident	Confident	Confident	Confident	Disagree	Disagree	Strongly Agree	Disagree	Agree	Disagree	Strongly Disagree	Strongly Disagree	Strongly Disagree	Strongly Agree	Nurse		Other	Medical Management	178	10-19 years	36 to 45 years old	Advanced degree (Master's, Doctorate, etc.)	Rural	Yes	White, European American, or European		Woman
Confident	Confident	Hesitant	Hesitant	Confident	Confident	Hesitant	Hesitant	Hesitant	Hesitant	Hesitant	Hesitant	Hesitant	Hesitant	Hesitant	Hesitant	Hesitant	Not Confident	Confident	Hesitant	Confident	Confident	Hesitant	Disagree	Disagree	Agree	Disagree	Agree	Disagree	Disagree	Disagree	Disagree	Agree	Nurse		Prefer not to answer.		178	20-29 years	46 to 55 years old	College 4 years or more (college graduate)	Rural	Yes	Prefer not to answer.		Prefer not to answer.
Confident	Hesitant	Not Confident	Hesitant	Confident	Confident	Confident	Hesitant	Hesitant	Hesitant	Hesitant	Not Confident	Not Confident	Not Confident	Not Confident	Not Confident	Not Confident	Not Confident	Confident		Hesitant	Hesitant	Hesitant	Disagree	Disagree	Agree	Agree	Agree	Agree	Disagree	Disagree	Disagree	Agree	Nurse		Other	Revenue Management Compliance	178	20-29 years	46 to 55 years old	College 4 years or more (college graduate)	Rural	Yes	White, European American, or European		Woman
Hesitant	Hesitant	Hesitant	Hesitant	Hesitant	Hesitant	Hesitant	Hesitant	Hesitant	Hesitant	Hesitant	Not Confident	Not Confident	Not Confident	Not Confident	Not Confident	Not Confident	Very Confident	Very Confident	Hesitant	Confident	Confident	Hesitant	Disagree	Agree	Agree	Agree	Agree	Agree	Disagree	Disagree	Disagree	Strongly Agree	Nurse		Psychiatry		178	30 years or more	56 to 65 years old	College 4 years or more (college graduate)	Rural	Yes	White, European American, or European		Woman
Very Confident	Confident	Confident	Not Confident	Hesitant	Confident	Very Confident	Not Confident	Hesitant	Hesitant	Hesitant	Not Confident	Not Confident	Not Confident	Not Confident	Not Confident	Not Confident	Hesitant	Confident	Hesitant	Hesitant	Not Confident	Confident	Disagree	Agree	Strongly Agree	Agree	Agree	Agree	Strongly Disagree	Strongly Disagree	Disagree	Agree	Nurse		Other	med surg	178	Fewer than 10 years	26 to 35 years old	College 4 years or more (college graduate)	Suburban	Yes	White, European American, or European		Woman
Hesitant	Not Confident	Hesitant	Hesitant	Hesitant	Hesitant	Hesitant	Hesitant	Not Confident	Hesitant	Hesitant	Hesitant	Hesitant	Hesitant	Hesitant	Hesitant	Hesitant	Hesitant	Hesitant	Hesitant	Hesitant	Hesitant	Hesitant	Strongly Disagree	Disagree	Agree	Agree	Agree	Agree	Disagree	Strongly Disagree	Strongly Disagree	Agree	Nurse		Other		184	20-29 years	46 to 55 years old	College 4 years or more (college graduate)	Suburban	Yes	White, European American, or European		Woman
Hesitant	Hesitant	Hesitant	Not Confident	Not Confident	Hesitant	Confident	Hesitant	Not Confident	Confident	Confident	Hesitant	Hesitant	Not Confident	Not Confident	Hesitant	Not Confident	Hesitant	Confident	Confident	Confident	Confident	Confident	Strongly Disagree	Disagree	Agree	Agree	Agree	Agree	Disagree	Strongly Disagree	Strongly Disagree	Agree	Nurse		Other	HFAM 7: Cardiac SCU/ICU	178	Fewer than 10 years	18 to 25 years old	College 4 years or more (college graduate)	Urban	Yes	White, European American, or European		Woman
Hesitant	Hesitant	Hesitant	Not Confident		Hesitant	Not Confident	Not Confident	Not Confident	Hesitant	Hesitant	Not Confident	Not Confident	Not Confident	Not Confident	Not Confident	Not Confident	Not Confident	Hesitant	Not Confident	Not Confident	Not Confident	Not Confident	Disagree	Disagree	Agree	Agree	Agree	Agree	Disagree	Disagree	Disagree	Agree	Nurse		Other	Med/Surg Telemetry	178	Fewer than 10 years	26 to 35 years old	1 to 3 years after high school (some college, Associate's degree, or technical school)	Rural	Yes	White, European American, or European		Woman
Confident	Hesitant	Hesitant	Not Confident	Hesitant	Confident	Confident	Hesitant	Not Confident	Not Confident	Not Confident	Hesitant	Hesitant	Not Confident	Not Confident	Hesitant	Not Confident	Not Confident	Not Confident	Not Confident	Not Confident	Not Confident	Not Confident	Strongly Disagree	Agree	Strongly Agree	Strongly Disagree	Disagree	Disagree	Disagree	Strongly Disagree	Strongly Disagree	Strongly Agree	Nurse		Other	Quality improvement for insurance company	178	20-29 years	46 to 55 years old	College 4 years or more (college graduate)	Rural	Yes	White, European American, or European		Woman
Hesitant	Hesitant	Hesitant	Not Confident	Hesitant	Hesitant	Hesitant	Hesitant	Hesitant	Hesitant	Hesitant	Not Confident	Not Confident	Not Confident	Not Confident	Not Confident	Not Confident	Not Confident	Confident	Not Confident	Hesitant	Hesitant	Hesitant	Strongly Disagree	Strongly Disagree	Strongly Agree	Agree	Agree	Agree	Disagree	Agree	Agree	Agree	Nurse		Other	Case Management	178	20-29 years	46 to 55 years old	Advanced degree (Master's, Doctorate, etc.)	Rural	Yes	White, European American, or European		Woman
Confident	Hesitant	Hesitant	Hesitant	Hesitant	Hesitant	Hesitant	Hesitant	Hesitant	Hesitant	Hesitant	Not Confident	Not Confident	Not Confident	Not Confident	Not Confident	Not Confident	Not Confident	Not Confident	Not Confident	Not Confident	Not Confident	Not Confident	Disagree	Disagree	Agree	Agree	Agree	Disagree	Disagree	Disagree	Disagree	Agree	Nurse		Other	CM, nephrology	170	20-29 years	46 to 55 years old	College 4 years or more (college graduate)	Rural	Yes	White, European American, or European		Woman
Very Confident	Very Confident	Confident	Hesitant	Confident	Confident	Confident	Hesitant	Not Confident	Hesitant	Hesitant	Not Confident	Not Confident	Not Confident	Not Confident	Not Confident	Not Confident	Not Confident	Not Confident	Not Confident	Not Confident	Confident	Hesitant	Strongly Disagree	Disagree	Strongly Agree	Agree	Agree	Agree	Strongly Disagree	Strongly Disagree	Strongly Disagree	Strongly Agree	Nurse		Psychiatry		170	Fewer than 10 years	26 to 35 years old	College 4 years or more (college graduate)	Rural	Yes	White, European American, or European		Woman
Hesitant	Not Confident	Hesitant	Not Confident	Hesitant	Hesitant	Hesitant	Not Confident	Not Confident	Not Confident	Not Confident	Not Confident	Not Confident	Not Confident	Not Confident	Not Confident	Hesitant	Not Confident	Hesitant	Hesitant	Not Confident	Not Confident	Hesitant	Disagree	Agree	Agree	Agree	Disagree	Agree	Strongly Disagree	Disagree	Disagree	Agree	Nurse		Other	hospital outpatient clinic	170	30 years or more	56 to 65 years old	Advanced degree (Master's, Doctorate, etc.)	Rural	Yes	White, European American, or European		Woman
Not Confident	Not Confident	Not Confident	Confident	Very Confident	Not Confident	Not Confident	Not Confident	Not Confident	Not Confident	Not Confident	Not Confident	Not Confident	Not Confident	Not Confident	Not Confident	Not Confident	Not Confident	Not Confident	Not Confident	Not Confident	Not Confident	Not Confident	Disagree	Agree	Strongly Agree	Agree	Strongly Agree	Agree	Disagree	Disagree	Strongly Disagree	Strongly Disagree	Nurse		Other		178	30 years or more	56 to 65 years old	1 to 3 years after high school (some college, Associate's degree, or technical school)	Rural	Yes	White, European American, or European		Woman
Confident	Hesitant	Hesitant	Hesitant	Confident	Confident	Confident	Hesitant	Hesitant	Hesitant	Hesitant	Hesitant	Hesitant	Hesitant	Hesitant	Confident	Confident	Hesitant	Confident	Hesitant	Hesitant	Hesitant	Hesitant	Disagree	Disagree	Strongly Agree		Agree	Disagree	Disagree	Strongly Disagree	Strongly Disagree	Agree	Physician		Other		168	20-29 years	46 to 55 years old	Advanced degree (Master's, Doctorate, etc.)	Rural	Yes	Prefer not to answer.		Man
Confident	Confident	Hesitant	Not Confident	Not Confident	Hesitant	Hesitant	Hesitant	Hesitant	Hesitant	Not Confident	Not Confident	Not Confident	Not Confident	Not Confident	Not Confident	Not Confident	Not Confident	Hesitant	Not Confident	Hesitant	Hesitant	Hesitant	Disagree	Disagree	Agree	Strongly Disagree	Strongly Disagree	Disagree		Disagree	Disagree	Agree	Nurse		Other	Revenue Management	178	30 years or more	56 to 65 years old	1 to 3 years after high school (some college, Associate's degree, or technical school)	Rural	Yes	White, European American, or European		Woman
Hesitant	Not Confident	Hesitant	Not Confident	Not Confident	Hesitant	Hesitant	Not Confident	Not Confident	Not Confident	Not Confident	Not Confident	Not Confident	Not Confident	Not Confident	Not Confident	Not Confident	Not Confident	Confident	Hesitant	Not Confident	Not Confident	Not Confident	Strongly Disagree	Disagree	Agree	Agree	Strongly Agree	Strongly Agree	Strongly Disagree	Strongly Disagree	Strongly Disagree	Strongly Agree	Nurse		Other	Cardiology	185	20-29 years	46 to 55 years old	College 4 years or more (college graduate)	Suburban	Yes	White, European American, or European		Woman
Confident	Hesitant	Confident	Confident	Confident	Hesitant	Hesitant	Not Confident	Not Confident	Hesitant	Hesitant	Hesitant	Not Confident	Not Confident	Not Confident	Hesitant	Confident	Not Confident	Not Confident	Not Confident	Hesitant	Hesitant	Not Confident	Disagree	Disagree	Agree	Agree	Agree	Agree	Disagree	Disagree	Agree	Agree	Nurse		Pediatrics		178	30 years or more	46 to 55 years old	Advanced degree (Master's, Doctorate, etc.)	Rural	Yes	White, European American, or European		Woman
Confident	Hesitant	Hesitant	Hesitant	Hesitant	Confident	Confident	Hesitant	Hesitant	Confident	Hesitant	Hesitant	Hesitant	Hesitant	Hesitant	Hesitant	Confident	Confident	Confident	Confident	Confident	Confident	Confident	Agree	Disagree	Disagree	Agree	Agree	Agree	Disagree	Disagree	Disagree	Strongly Agree	Nurse		Other	ICU	185	10-19 years	36 to 45 years old	College 4 years or more (college graduate)	Rural	Yes	White, European American, or European		Man
Hesitant	Confident		Not Confident	Confident	Hesitant	Hesitant	Not Confident	Not Confident	Not Confident	Hesitant	Not Confident	Not Confident	Not Confident	Not Confident	Hesitant	Not Confident	Not Confident	Not Confident	Not Confident	Confident	Hesitant	Hesitant	Strongly Disagree	Strongly Disagree	Strongly Agree	Disagree	Agree	Agree	Strongly Disagree	Disagree	Strongly Disagree	Strongly Agree	Nurse		Other	community medicine	186	30 years or more	46 to 55 years old	College 4 years or more (college graduate)	Suburban	Yes	None of these fully describe me.		Woman
Confident	Confident	Hesitant	Hesitant	Hesitant	Confident	Confident	Hesitant	Hesitant	Hesitant	Hesitant	Not Confident	Not Confident	Not Confident	Not Confident	Not Confident	Not Confident	Not Confident	Hesitant	Not Confident	Not Confident	Not Confident	Not Confident	Strongly Disagree	Strongly Disagree	Strongly Disagree	Strongly Disagree	Agree	Agree	Strongly Disagree	Strongly Disagree	Agree	Strongly Agree	Nurse		Emergency		168	30 years or more	46 to 55 years old	Advanced degree (Master's, Doctorate, etc.)	Rural	Yes	White, European American, or European		Woman
Confident	Confident	Confident	Confident	Confident	Confident	Confident	Confident	Confident	Confident	Confident	Hesitant	Hesitant	Hesitant	Hesitant	Hesitant	Confident	Hesitant	Confident	Confident	Confident	Confident	Confident	Disagree	Strongly Disagree	Agree	Agree	Disagree	Agree	Strongly Disagree	Agree	Strongly Agree	Strongly Agree	Nurse		Emergency		185	Fewer than 10 years	26 to 35 years old	College 4 years or more (college graduate)	Rural	Yes	White, European American, or European		Woman
Confident	Not Confident	Confident	Hesitant	Hesitant	Confident	Hesitant	Hesitant	Not Confident	Not Confident	Not Confident	Not Confident	Not Confident	Not Confident	Not Confident	Not Confident	Not Confident	Not Confident	Hesitant	Not Confident	Not Confident	Not Confident	Hesitant	Disagree	Strongly Disagree	Strongly Agree	Agree	Agree	Agree	Disagree	Strongly Disagree	Strongly Disagree	Strongly Agree		optometrist	Other	ophthalmology	187	Fewer than 10 years	26 to 35 years old	Advanced degree (Master's, Doctorate, etc.)	Rural	Yes	White, European American, or European		Woman
Confident	Not Confident	Not Confident	Not Confident	Not Confident	Confident	Confident	Not Confident	Not Confident	Not Confident	Hesitant	Hesitant	Hesitant	Not Confident	Not Confident	Hesitant	Hesitant	Not Confident	Confident	Not Confident	Not Confident	Not Confident	Not Confident	Disagree	Agree					Disagree	Strongly Disagree	Strongly Disagree	Strongly Agree	Nurse		Other	outpatient clinic	178	20-29 years	36 to 45 years old	1 to 3 years after high school (some college, Associate's degree, or technical school)	Rural	Yes	White, European American, or European		Woman
Hesitant	Hesitant	Not Confident	Not Confident	Hesitant	Hesitant	Hesitant	Not Confident	Hesitant	Not Confident	Hesitant	Not Confident	Not Confident	Not Confident	Not Confident	Not Confident	Not Confident	Not Confident	Hesitant	Not Confident	Not Confident	Not Confident	Not Confident	Agree	Agree	Agree	Disagree	Agree	Disagree	Disagree	Strongly Disagree	Strongly Disagree	Strongly Agree	Nurse		Other	operating room	178	Prefer not to answer.	Prefer not to answer.	1 to 3 years after high school (some college, Associate's degree, or technical school)	Rural	Yes	White, European American, or European		Woman
Confident	Confident	Not Confident	Not Confident	Hesitant	Confident	Confident	Not Confident	Not Confident	Not Confident	Not Confident	Not Confident	Not Confident	Not Confident	Not Confident	Not Confident	Not Confident	Not Confident	Hesitant	Not Confident	Not Confident	Not Confident	Not Confident	Disagree	Disagree	Agree	Strongly Agree	Agree	Strongly Agree	Disagree	Strongly Disagree	Disagree	Agree	Physician			Dermatolgy	187	30 years or more	66 to 75 years old	Advanced degree (Master's, Doctorate, etc.)	Suburban	Yes	White, European American, or European		Man
Confident	Hesitant	Hesitant	Hesitant	Hesitant	Confident	Hesitant	Hesitant	Hesitant	Hesitant	Hesitant	Not Confident	Not Confident	Not Confident	Not Confident	Not Confident	Hesitant	Not Confident	Confident	Not Confident	Hesitant	Hesitant	Hesitant	Strongly Disagree	Disagree	Agree	Agree	Agree	Agree	Strongly Disagree	Disagree	Strongly Disagree	Agree	Nurse		Other		178	20-29 years	46 to 55 years old	College 4 years or more (college graduate)	Rural	Yes	White, European American, or European		Woman
Very Confident	Hesitant	Hesitant	Hesitant	Hesitant	Hesitant	Hesitant	Not Confident	Not Confident	Not Confident	Not Confident	Not Confident	Not Confident	Not Confident	Not Confident	Not Confident	Not Confident	Not Confident	Not Confident	Not Confident	Not Confident	Not Confident	Not Confident	Strongly Disagree	Strongly Disagree	Agree	Agree	Agree	Agree	Strongly Disagree	Strongly Disagree	Strongly Disagree	Strongly Agree	Nurse		Pediatrics		178	10-19 years	36 to 45 years old	College 4 years or more (college graduate)	Rural	Yes	White, European American, or European		Woman
Hesitant	Hesitant	Confident	Hesitant	Confident	Confident	Confident	Not Confident	Hesitant	Hesitant	Hesitant	Not Confident	Not Confident	Not Confident	Not Confident	Not Confident	Not Confident	Hesitant	Very Confident	Hesitant	Confident	Confident	Hesitant	Strongly Disagree	Disagree	Agree	Disagree	Disagree	Disagree	Disagree	Disagree	Disagree	Agree	Nurse		Other	Clinical educator	178	30 years or more	56 to 65 years old	Advanced degree (Master's, Doctorate, etc.)	Rural	Yes	White, European American, or European		Woman
Confident	Not Confident	Hesitant	Not Confident	Hesitant	Confident	Confident	Hesitant	Hesitant	Hesitant	Hesitant	Not Confident	Hesitant	Hesitant	Hesitant	Hesitant	Hesitant	Hesitant	Confident	Hesitant	Hesitant	Hesitant	Hesitant	Disagree	Disagree	Agree	Disagree	Agree	Agree	Strongly Disagree	Disagree	Disagree	Strongly Agree	Nurse		Other		178	10-19 years	36 to 45 years old	Advanced degree (Master's, Doctorate, etc.)	Rural	Yes	White, European American, or European		Man
Confident	Confident	Confident	Hesitant	Not Confident	Very Confident	Very Confident	Hesitant	Confident	Not Confident	Confident	Not Confident	Not Confident	Not Confident	Confident	Confident		Not Confident	Confident		Confident	Confident	Confident
Confident	Confident	Hesitant	Hesitant	Hesitant	Confident	Confident	Confident	Confident	Hesitant	Confident	Confident	Confident	Hesitant	Hesitant	Confident	Confident	Hesitant	Very Confident	Hesitant	Confident	Confident	Confident	Strongly Disagree	Disagree	Agree	Agree	Agree	Agree	Disagree	Disagree	Strongly Disagree	Strongly Agree	Nurse	Health Manager	Other	Health Manager-REDACTED	187	10-19 years	36 to 45 years old	College 4 years or more (college graduate)	Urban	Yes	White, European American, or European		Woman
Confident	Hesitant	Hesitant	Not Confident	Hesitant	Hesitant	Hesitant	Hesitant	Hesitant	Hesitant	Hesitant	Not Confident	Not Confident	Not Confident	Not Confident	Not Confident	Confident	Not Confident	Confident	Hesitant	Hesitant	Hesitant	Hesitant	Disagree	Disagree	Agree	Agree	Disagree	Disagree	Strongly Disagree	Disagree	Strongly Disagree	Agree	Nurse		Other	Anesthesia	185	20-29 years	36 to 45 years old	Advanced degree (Master's, Doctorate, etc.)	Suburban	Yes	White, European American, or European		Woman
Confident	Confident	Hesitant	Not Confident	Hesitant	Very Confident	Very Confident	Hesitant	Hesitant	Hesitant	Hesitant	Not Confident	Not Confident	Not Confident	Not Confident	Hesitant	Not Confident	Not Confident	Not Confident	Not Confident	Not Confident	Not Confident	Hesitant	Strongly Disagree	Disagree	Strongly Agree	Agree	Disagree	Disagree	Strongly Disagree	Strongly Disagree	Strongly Disagree	Agree	Nurse		Other	Care Access	178	20-29 years	36 to 45 years old	1 to 3 years after high school (some college, Associate's degree, or technical school)	Rural	Yes	White, European American, or European		Woman
Confident	Confident	Hesitant	Hesitant	Hesitant	Very Confident	Very Confident	Confident	Confident	Confident	Hesitant	Not Confident	Not Confident	Not Confident	Not Confident	Not Confident	Not Confident	Hesitant	Confident	Hesitant	Confident	Confident	Hesitant	Disagree	Agree	Strongly Agree	Agree	Agree	Agree	Disagree	Disagree	Disagree	Strongly Agree	Nurse		Other		178	10-19 years	46 to 55 years old	1 to 3 years after high school (some college, Associate's degree, or technical school)	Rural	Yes	White, European American, or European		Woman
Very Confident	Very Confident	Very Confident	Hesitant	Confident	Confident	Confident	Hesitant	Hesitant	Not Confident	Not Confident	Not Confident	Not Confident	Not Confident	Not Confident	Not Confident	Not Confident	Not Confident	Hesitant	Hesitant	Hesitant	Not Confident	Hesitant	Disagree	Disagree	Agree	Agree	Agree	Disagree	Strongly Disagree	Disagree	Strongly Disagree	Strongly Agree	Nurse		Other	Endoscopy	170	20-29 years	46 to 55 years old	1 to 3 years after high school (some college, Associate's degree, or technical school)	Rural	Yes	White, European American, or European		Woman
Confident	Confident	Not Confident	Not Confident	Not Confident	Hesitant	Hesitant	Not Confident	Hesitant	Not Confident	Hesitant	Hesitant	Hesitant	Hesitant	Hesitant	Hesitant	Hesitant	Not Confident	Hesitant	Hesitant	Hesitant	Hesitant	Hesitant	Strongly Disagree	Disagree	Agree	Agree	Agree	Agree	Disagree	Strongly Disagree	Disagree	Agree	Nurse		Pediatrics		170	20-29 years	46 to 55 years old	College 4 years or more (college graduate)	Rural	Yes	White, European American, or European		Woman
Confident	Hesitant	Hesitant	Hesitant	Hesitant	Confident	Confident	Hesitant	Not Confident	Hesitant	Hesitant	Not Confident	Not Confident	Not Confident	Not Confident	Not Confident	Not Confident	Not Confident	Not Confident	Not Confident	Not Confident	Not Confident	Hesitant	Disagree	Disagree	Agree	Agree	Agree	Agree	Agree	Disagree	Strongly Disagree	Strongly Agree	Nurse		Other		178	Fewer than 10 years	26 to 35 years old	College 4 years or more (college graduate)	Rural	Yes	White, European American, or European		Woman
Confident	Confident	Hesitant	Hesitant	Very Confident	Very Confident	Very Confident	Hesitant	Hesitant	Not Confident	Hesitant	Not Confident	Not Confident	Not Confident	Not Confident	Hesitant	Not Confident	Hesitant	Confident	Confident	Not Confident	Hesitant	Not Confident	Disagree	Disagree	Agree	Agree	Disagree	Disagree	Strongly Disagree	Disagree	Disagree	Strongly Agree	Physician		Other	Physical Medicine and Rehabilitation	178	10-19 years	46 to 55 years old	Advanced degree (Master's, Doctorate, etc.)	Rural	No	Asian		Man
Confident	Hesitant	Hesitant	Hesitant	Hesitant	Confident	Confident	Hesitant	Confident	Hesitant	Confident	Hesitant	Hesitant	Hesitant	Hesitant	Hesitant	Confident	Hesitant	Confident	Hesitant	Very Confident	Hesitant	Hesitant
Hesitant	Hesitant	Hesitant	Not Confident	Not Confident	Hesitant	Hesitant	Not Confident	Not Confident	Not Confident	Not Confident	Not Confident	Not Confident	Not Confident	Not Confident	Not Confident	Not Confident	Not Confident	Hesitant	Not Confident	Not Confident	Not Confident	Not Confident	Disagree	Disagree	Agree	Agree	Agree	Agree	Strongly Disagree	Disagree	Strongly Disagree	Strongly Agree	Nurse		Other		185	30 years or more	56 to 65 years old	Advanced degree (Master's, Doctorate, etc.)	Suburban	Yes	White, European American, or European		Woman
Confident	Confident	Hesitant	Hesitant	Confident	Confident	Very Confident	Hesitant	Hesitant	Confident	Confident	Hesitant	Hesitant	Hesitant	Hesitant	Hesitant	Hesitant	Hesitant	Confident	Hesitant	Hesitant	Hesitant	Hesitant	Agree	Agree	Agree	Agree	Agree	Agree	Disagree	Disagree	Disagree	Agree	Nurse		Other		177	20-29 years	46 to 55 years old	College 4 years or more (college graduate)	Rural	Yes	White, European American, or European		Woman
Confident	Hesitant	Very Confident	Not Confident	Hesitant	Confident	Confident	Hesitant	Hesitant	Confident	Confident	Not Confident	Not Confident	Not Confident	Not Confident	Not Confident	Hesitant	Not Confident	Confident	Not Confident	Hesitant	Not Confident	Confident	Strongly Disagree	Strongly Disagree	Strongly Agree	Disagree	Agree	Agree	Disagree	Disagree	Strongly Disagree	Agree	Nurse		Emergency		170	Fewer than 10 years	26 to 35 years old	College 4 years or more (college graduate)	Suburban	Yes	White, European American, or European		Woman
Confident	Confident	Confident	Confident	Very Confident	Confident	Confident	Confident	Confident	Confident	Confident	Hesitant	Hesitant	Hesitant	Hesitant	Hesitant	Confident	Hesitant	Confident	Hesitant	Hesitant	Confident	Confident	Strongly Disagree	Disagree	Strongly Agree	Disagree	Agree	Disagree	Disagree	Disagree	Disagree	Disagree	Nurse		Other	clinical research, previously inpatient cardiology	178	10-19 years	36 to 45 years old	College 4 years or more (college graduate)	Rural	Yes	White, European American, or European		Woman
Hesitant	Hesitant	Hesitant	Not Confident	Not Confident	Hesitant	Hesitant	Not Confident	Hesitant	Hesitant	Confident	Hesitant	Hesitant	Hesitant	Hesitant	Hesitant	Hesitant	Hesitant	Hesitant	Hesitant	Hesitant	Hesitant	Hesitant	Strongly Disagree	Disagree	Strongly Agree	Disagree	Agree	Agree	Strongly Disagree	Strongly Disagree	Strongly Disagree	Strongly Agree	Nurse		Other	Surgery	187	Fewer than 10 years	26 to 35 years old	College 4 years or more (college graduate)	Suburban	Yes	White, European American, or European		Woman
Confident	Hesitant	Confident	Not Confident	Confident	Confident	Confident	Hesitant	Not Confident	Not Confident	Hesitant	Not Confident	Not Confident	Not Confident	Not Confident	Not Confident	Not Confident	Not Confident	Confident	Hesitant	Hesitant	Hesitant	Hesitant	Strongly Disagree	Disagree	Agree	Strongly Agree	Agree	Agree	Disagree	Strongly Disagree	Strongly Disagree	Strongly Agree	Nurse		Other	Employee Health	168	Fewer than 10 years	26 to 35 years old	1 to 3 years after high school (some college, Associate's degree, or technical school)	Rural	Yes	White, European American, or European		Woman
Confident	Hesitant	Hesitant	Not Confident	Not Confident	Confident	Confident	Not Confident	Not Confident	Hesitant	Hesitant	Hesitant	Hesitant	Not Confident	Not Confident	Not Confident	Not Confident	Not Confident	Not Confident	Not Confident	Not Confident	Not Confident	Not Confident	Strongly Disagree	Disagree	Agree	Agree	Disagree	Disagree	Disagree	Disagree	Strongly Disagree	Strongly Agree	Nurse		Other	Geisinger Health Plan	178	30 years or more	56 to 65 years old	College 4 years or more (college graduate)	Rural	Yes	White, European American, or European		Woman
Very Confident	Confident	Very Confident	Confident	Very Confident	Very Confident	Confident	Confident	Hesitant	Hesitant	Hesitant	Confident	Confident	Confident	Confident	Confident	Confident	Hesitant	Confident	Confident	Hesitant	Hesitant	Confident	Strongly Disagree	Strongly Disagree	Agree	Agree	Agree	Agree	Disagree	Disagree	Agree	Strongly Agree	Nurse		Other	surgery	178	30 years or more	56 to 65 years old	College 4 years or more (college graduate)	Rural	Yes	White, European American, or European		Woman
Not Confident	Not Confident	Not Confident	Not Confident	Not Confident	Not Confident	Not Confident	Not Confident	Not Confident	Not Confident	Not Confident	Not Confident	Not Confident	Not Confident	Not Confident	Not Confident	Not Confident	Not Confident	Not Confident	Not Confident	Not Confident	Not Confident	Not Confident	Disagree	Agree	Strongly Agree	Agree	Strongly Agree	Strongly Agree	Strongly Disagree	Strongly Disagree	Strongly Disagree	Agree		Clinic Nurse Supervisor		Surgical Specialties	168	20-29 years	46 to 55 years old	College 4 years or more (college graduate)	Suburban	Yes	White, European American, or European		Woman
Confident	Hesitant	Confident	Hesitant	Confident	Confident	Confident	Hesitant	Hesitant	Hesitant	Hesitant	Not Confident	Not Confident	Not Confident	Not Confident	Not Confident	Not Confident	Not Confident	Not Confident	Hesitant	Hesitant	Hesitant	Hesitant	Agree	Disagree	Strongly Agree	Agree	Agree	Agree	Disagree	Disagree	Agree	Agree	Nurse		Emergency		170	Fewer than 10 years	18 to 25 years old	College 4 years or more (college graduate)	Suburban	Yes	White, European American, or European		Woman
Confident	Confident	Not Confident	Not Confident	Hesitant	Hesitant	Hesitant	Hesitant	Not Confident	Not Confident	Not Confident	Not Confident	Not Confident	Not Confident	Not Confident	Not Confident	Not Confident	Not Confident	Not Confident	Not Confident	Not Confident	Not Confident	Hesitant	Disagree		Agree	Agree	Agree	Agree	Agree	Disagree	Disagree	Strongly Agree	Physician		Pediatrics		178	Fewer than 10 years		Advanced degree (Master's, Doctorate, etc.)	Rural	No	Asian		Woman
Hesitant	Hesitant	Not Confident	Not Confident	Hesitant	Hesitant	Not Confident	Not Confident	Not Confident	Not Confident	Not Confident	Not Confident	Not Confident	Not Confident	Not Confident	Not Confident	Not Confident	Not Confident	Not Confident	Not Confident	Not Confident	Not Confident	Not Confident	Disagree	Disagree	Strongly Disagree	Agree	Agree	Agree	Strongly Disagree	Strongly Disagree	Strongly Disagree	Strongly Agree	Nurse		Other	OR	178	Fewer than 10 years	18 to 25 years old	1 to 3 years after high school (some college, Associate's degree, or technical school)	Rural	Yes	White, European American, or European		Woman
Hesitant	Not Confident	Not Confident	Not Confident	Hesitant	Not Confident	Not Confident	Not Confident	Not Confident	Not Confident	Not Confident	Not Confident	Not Confident	Not Confident	Not Confident	Not Confident	Not Confident	Not Confident	Not Confident	Not Confident	Not Confident	Not Confident	Not Confident	Disagree	Disagree	Agree	Agree	Strongly Agree	Agree	Strongly Disagree	Strongly Disagree	Strongly Disagree	Agree	Nurse		Other		187	30 years or more	Prefer not to answer.	1 to 3 years after high school (some college, Associate's degree, or technical school)	Prefer not to answer.	Yes	White, European American, or European		Woman
Confident	Hesitant	Confident	Confident	Confident	Confident	Confident	Hesitant	Hesitant	Hesitant	Confident	Not Confident	Not Confident	Not Confident	Not Confident	Hesitant	Not Confident	Not Confident	Not Confident	Not Confident	Not Confident	Not Confident	Hesitant	Disagree	Disagree	Agree	Disagree			Disagree	Disagree	Disagree	Agree	Nurse		Other	outpatient clinic	178	20-29 years	46 to 55 years old	College 4 years or more (college graduate)	Rural	Yes	White, European American, or European		Woman
Hesitant	Not Confident	Not Confident	Not Confident	Hesitant	Hesitant	Hesitant	Not Confident	Not Confident	Not Confident	Not Confident	Not Confident	Not Confident	Not Confident	Not Confident	Not Confident	Not Confident	Not Confident	Not Confident	Not Confident	Not Confident	Not Confident	Not Confident	Strongly Disagree	Disagree	Agree	Agree	Agree	Agree	Strongly Disagree	Strongly Disagree	Strongly Disagree	Strongly Agree	Nurse		Other	OR	170	20-29 years	46 to 55 years old	1 to 3 years after high school (some college, Associate's degree, or technical school)	Rural	Yes	White, European American, or European		Woman
Hesitant	Hesitant	Hesitant	Not Confident	Not Confident	Hesitant	Hesitant	Not Confident	Not Confident	Not Confident	Not Confident	Not Confident	Not Confident	Not Confident	Not Confident	Not Confident	Not Confident	Not Confident	Hesitant	Not Confident	Hesitant	Not Confident	Not Confident	Disagree	Agree	Agree	Agree	Agree	Agree	Disagree	Disagree	Disagree	Agree	Nurse		Other	Pediatric Neurology	.	10-19 years	46 to 55 years old	College 4 years or more (college graduate)	Rural	Yes	White, European American, or European		Woman
Confident	Hesitant	Not Confident	Not Confident	Hesitant	Hesitant	Hesitant	Not Confident	Not Confident	Not Confident	Hesitant	Not Confident	Not Confident	Not Confident	Not Confident	Not Confident	Not Confident	Not Confident	Not Confident	Not Confident	Hesitant	Not Confident	Not Confident	Strongly Disagree	Disagree	Agree	Agree	Disagree	Disagree	Disagree	Strongly Disagree	Strongly Disagree	Strongly Agree	Nurse		Prefer not to answer.		178	Fewer than 10 years	26 to 35 years old	1 to 3 years after high school (some college, Associate's degree, or technical school)	Rural	Yes	Hispanic, Latino, or Spanish		Man
Confident	Confident	Not Confident	Not Confident	Not Confident	Hesitant	Not Confident	Not Confident	Not Confident	Not Confident	Not Confident	Not Confident	Not Confident	Not Confident	Not Confident	Not Confident	Not Confident	Not Confident	Not Confident	Not Confident	Not Confident	Not Confident	Not Confident	Agree	Agree	Agree	Agree	Disagree	Disagree	Disagree	Strongly Disagree	Strongly Disagree	Agree	Physician		Other		187	Fewer than 10 years	36 to 45 years old	Advanced degree (Master's, Doctorate, etc.)	Suburban	No	Middle Eastern or North African		Man
Confident	Hesitant	Confident	Not Confident	Hesitant	Hesitant	Confident	Not Confident	Not Confident	Not Confident	Hesitant	Not Confident	Not Confident	Not Confident	Not Confident	Not Confident	Not Confident	Not Confident	Hesitant	Not Confident	Not Confident	Not Confident	Hesitant	Disagree	Strongly Disagree	Strongly Agree	Disagree	Disagree	Strongly Disagree	Strongly Disagree	Disagree	Strongly Disagree	Strongly Agree	Nurse		Other	float nurse, throughout the hospital	170	Fewer than 10 years	26 to 35 years old	College 4 years or more (college graduate)	Rural	Yes	White, European American, or European		Woman
Confident	Confident	Confident	Hesitant	Hesitant	Confident	Confident	Hesitant	Hesitant	Confident	Confident	Hesitant	Hesitant	Hesitant	Hesitant	Hesitant	Hesitant	Confident	Confident	Confident	Confident	Confident	Confident	Strongly Disagree	Agree	Strongly Agree	Disagree	Agree	Agree	Disagree	Agree	Disagree	Agree	Nurse		Other	critical care	187	Fewer than 10 years	26 to 35 years old	College 4 years or more (college graduate)	Suburban	Yes	White, European American, or European		Man
Hesitant	Hesitant	Not Confident	Not Confident	Hesitant	Hesitant	Hesitant	Hesitant	Hesitant	Hesitant	Hesitant	Hesitant	Hesitant	Hesitant	Hesitant	Hesitant	Hesitant	Hesitant	Hesitant	Hesitant	Not Confident	Not Confident	Hesitant	Agree	Agree	Agree	Agree	Agree	Agree	Disagree	Strongly Disagree	Strongly Disagree	Disagree	Physician		Emergency		178	30 years or more	66 to 75 years old	Advanced degree (Master's, Doctorate, etc.)	Rural	Yes	White, European American, or European		Man
Confident	Hesitant	Hesitant	Not Confident	Not Confident	Not Confident	Not Confident	Not Confident	Not Confident	Not Confident	Not Confident	Not Confident	Not Confident	Not Confident	Not Confident	Not Confident	Not Confident	Not Confident	Confident	Not Confident	Not Confident	Not Confident	Not Confident
Hesitant	Not Confident	Not Confident	Not Confident	Not Confident	Not Confident	Not Confident	Not Confident	Not Confident	Not Confident	Not Confident	Not Confident	Not Confident	Not Confident	Not Confident	Not Confident	Not Confident	Not Confident	Not Confident	Not Confident	Not Confident	Not Confident	Not Confident
Hesitant	Not Confident	Not Confident	Not Confident	Not Confident	Not Confident	Not Confident	Not Confident	Not Confident	Not Confident	Not Confident	Not Confident	Not Confident	Not Confident	Not Confident	Not Confident	Not Confident	Not Confident	Not Confident	Not Confident	Not Confident	Not Confident	Not Confident	Agree	Agree	Agree	Disagree	Agree	Agree	Strongly Disagree	Strongly Disagree	Strongly Disagree	Agree	Physician		Pediatrics	Derm	178	Fewer than 10 years	36 to 45 years old	Advanced degree (Master's, Doctorate, etc.)	Rural	Yes	White, European American, or European		Man
Confident	Confident	Hesitant	Not Confident	Not Confident	Confident	Confident	Not Confident	Not Confident	Not Confident	Hesitant	Not Confident	Not Confident	Not Confident	Not Confident	Not Confident	Not Confident	Not Confident	Confident	Confident	Hesitant	Hesitant	Hesitant	Strongly Disagree	Disagree	Agree	Agree	Agree	Agree	Strongly Disagree	Strongly Disagree	Disagree	Agree	Nurse		Other		187	Fewer than 10 years	26 to 35 years old	College 4 years or more (college graduate)	Suburban	Yes	White, European American, or European		Woman
Confident	Hesitant	Hesitant	Hesitant	Hesitant	Hesitant	Hesitant	Hesitant	Hesitant	Hesitant	Hesitant	Hesitant	Hesitant	Hesitant	Hesitant	Hesitant	Hesitant	Hesitant	Confident	Hesitant	Hesitant	Hesitant	Hesitant	Disagree	Disagree	Agree				Disagree	Disagree	Disagree	Agree	Nurse		OB/GYN		187	10-19 years	36 to 45 years old	1 to 3 years after high school (some college, Associate's degree, or technical school)	Suburban	Yes	White, European American, or European		Woman
Very Confident	Very Confident	Hesitant	Hesitant	Hesitant	Confident	Confident	Hesitant	Confident	Confident	Confident	Hesitant	Hesitant	Hesitant	Hesitant	Hesitant	Hesitant	Not Confident	Confident	Hesitant	Hesitant	Hesitant	Hesitant	Disagree	Disagree	Agree	Agree	Strongly Agree	Agree	Disagree	Disagree	Disagree	Agree	Nurse		Other	Radiology	178	20-29 years	36 to 45 years old	College 4 years or more (college graduate)	Suburban	Yes	White, European American, or European		Woman
Confident	Confident	Hesitant	Not Confident	Not Confident	Not Confident	Hesitant	Not Confident	Not Confident	Hesitant	Hesitant	Not Confident	Not Confident	Not Confident	Not Confident	Not Confident	Not Confident	Not Confident	Hesitant	Not Confident	Not Confident	Not Confident	Hesitant	Disagree	Disagree	Agree	Agree	Agree	Agree	Strongly Disagree	Disagree	Strongly Disagree	Agree	Nurse		Other	critical care	178	Fewer than 10 years	26 to 35 years old	College 4 years or more (college graduate)	Rural	Yes	White, European American, or European		Man
Confident	Not Confident	Hesitant	Hesitant	Confident	Hesitant	Hesitant	Not Confident	Not Confident	Not Confident	Not Confident	Not Confident	Not Confident	Not Confident	Hesitant	Hesitant	Not Confident	Not Confident	Not Confident	Hesitant	Not Confident	Not Confident	Not Confident	Strongly Disagree	Strongly Disagree	Disagree	Agree	Agree	Disagree	Strongly Disagree	Disagree	Strongly Disagree	Strongly Agree	Nurse		Other		178	10-19 years	36 to 45 years old	College 4 years or more (college graduate)	Rural	Yes	White, European American, or European		Woman
Not Confident	Hesitant	Hesitant	Hesitant	Very Confident	Confident	Confident	Not Confident	Not Confident	Not Confident	Not Confident	Not Confident	Not Confident	Not Confident	Not Confident	Not Confident	Not Confident	Not Confident	Very Confident	Hesitant	Hesitant	Confident	Confident	Agree	Disagree	Strongly Disagree	Agree	Agree	Agree	Strongly Disagree	Strongly Disagree	Strongly Disagree	Strongly Disagree	Nurse		Pediatrics		178	30 years or more	56 to 65 years old	1 to 3 years after high school (some college, Associate's degree, or technical school)	Rural	Yes	White, European American, or European		Woman
Confident	Hesitant	Hesitant	Not Confident	Hesitant	Hesitant	Hesitant	Hesitant	Not Confident	Not Confident	Hesitant	Not Confident	Not Confident	Not Confident	Not Confident	Not Confident	Not Confident	Hesitant	Hesitant	Hesitant	Hesitant	Hesitant	Confident	Strongly Disagree	Disagree	Strongly Agree	Agree	Disagree	Disagree	Disagree	Strongly Disagree	Strongly Disagree	Strongly Agree	Nurse		Other	Family Practice	168	Fewer than 10 years	26 to 35 years old	College 4 years or more (college graduate)	Rural	Yes	White, European American, or European		Woman
Hesitant	Hesitant	Not Confident	Confident	Hesitant	Confident	Confident	Hesitant	Hesitant	Hesitant	Hesitant	Hesitant	Hesitant	Hesitant	Hesitant	Hesitant	Hesitant	Hesitant	Hesitant	Confident	Hesitant	Hesitant	Hesitant	Disagree	Disagree	Agree	Strongly Disagree	Disagree	Disagree	Disagree	Disagree	Agree	Agree	Nurse		Emergency		178	10-19 years	26 to 35 years old	1 to 3 years after high school (some college, Associate's degree, or technical school)	Rural	Yes	White, European American, or European		Man
Not Confident	Not Confident	Not Confident	Not Confident	Not Confident	Not Confident	Hesitant	Not Confident	Not Confident	Not Confident	Not Confident	Not Confident	Not Confident	Not Confident	Not Confident	Not Confident	Not Confident	Not Confident	Not Confident	Hesitant	Not Confident	Not Confident	Not Confident	Agree	Disagree	Agree	Agree	Agree	Agree	Strongly Disagree	Strongly Disagree	Strongly Disagree	Agree	Nurse		Psychiatry			30 years or more	56 to 65 years old	Advanced degree (Master's, Doctorate, etc.)	Rural	Yes	White, European American, or European		Man
Confident	Hesitant	Hesitant	Hesitant	Hesitant	Confident	Confident	Hesitant	Hesitant	Hesitant	Hesitant	Hesitant	Hesitant	Hesitant	Hesitant	Hesitant	Hesitant	Hesitant	Hesitant	Hesitant	Hesitant	Hesitant	Hesitant	Disagree	Disagree	Agree	Agree	Agree	Agree	Disagree	Disagree	Agree	Agree	Physician		Pediatrics		178	10-19 years	36 to 45 years old	Advanced degree (Master's, Doctorate, etc.)	Rural	Yes	White, European American, or European		Man
Confident	Confident	Confident	Confident	Confident	Confident	Confident	Confident	Hesitant	Confident	Hesitant	Very Confident	Very Confident	Very Confident	Very Confident	Very Confident	Very Confident	Confident	Confident	Confident	Confident	Confident	Confident	Strongly Disagree	Strongly Disagree	Strongly Disagree	Disagree	Strongly Disagree	Strongly Disagree	Strongly Disagree	Agree	Agree	Strongly Agree	Nurse		Psychiatry			Fewer than 10 years	46 to 55 years old	College 4 years or more (college graduate)	Suburban	Yes	White, European American, or European		Woman
Confident	Confident	Confident	Confident	Confident	Confident	Confident	Confident	Confident	Confident	Confident	Confident	Confident	Confident	Confident	Confident	Confident	Confident	Confident	Confident	Confident	Confident	Confident	Agree	Agree	Agree	Agree	Agree	Agree	Agree	Agree	Agree	Agree	Nurse		Other		170	10-19 years	26 to 35 years old	College 4 years or more (college graduate)	Rural	Yes	White, European American, or European		Woman
Not Confident	Not Confident	Not Confident	Not Confident	Not Confident	Confident	Confident	Hesitant	Hesitant	Not Confident	Not Confident	Not Confident	Not Confident	Not Confident	Not Confident	Not Confident		Not Confident	Confident	Not Confident	Not Confident	Not Confident	Hesitant	Strongly Agree	Agree	Agree	Disagree	Disagree	Disagree	Strongly Disagree	Strongly Disagree	Strongly Disagree	Agree	Physician		Other		178	30 years or more	56 to 65 years old	Advanced degree (Master's, Doctorate, etc.)	Rural	No	Native Hawaiian or other Pacific Islander		Man
Confident	Hesitant	Hesitant	Not Confident	Not Confident	Hesitant	Hesitant	Not Confident	Not Confident	Not Confident	Not Confident	Not Confident	Not Confident	Not Confident	Not Confident	Not Confident	Not Confident	Not Confident	Not Confident	Not Confident	Hesitant	Not Confident	Not Confident	Disagree	Disagree	Agree	Disagree	Disagree	Disagree	Disagree	Disagree	Disagree	Agree
Confident	Confident	Hesitant	Hesitant	Hesitant	Hesitant	Hesitant	Hesitant	Hesitant	Not Confident	Hesitant	Hesitant	Hesitant	Not Confident	Hesitant	Hesitant	Not Confident	Not Confident	Not Confident	Not Confident	Not Confident	Not Confident	Hesitant	Strongly Disagree	Strongly Disagree	Strongly Disagree	Agree	Agree	Agree	Disagree	Strongly Disagree	Disagree	Strongly Agree	Nurse		Prefer not to answer.		.	30 years or more	56 to 65 years old	Advanced degree (Master's, Doctorate, etc.)	Rural	Yes	White, European American, or European		Woman
Not Confident	Not Confident	Not Confident	Not Confident	Hesitant	Not Confident	Not Confident	Not Confident	Not Confident	Not Confident	Not Confident	Hesitant	Not Confident	Not Confident	Not Confident	Not Confident	Not Confident	Not Confident	Very Confident	Not Confident	Not Confident	Not Confident	Not Confident	Strongly Disagree	Agree	Strongly Agree	Strongly Agree	Agree	Strongly Agree	Strongly Disagree	Strongly Agree	Strongly Agree	Strongly Agree	Nurse		Other	OR	187	20-29 years	36 to 45 years old	1 to 3 years after high school (some college, Associate's degree, or technical school)	Suburban	Yes	White, European American, or European		Woman
Very Confident	Very Confident	Hesitant	Hesitant	Confident	Very Confident	Very Confident	Confident	Hesitant	Confident	Confident	Confident	Confident	Hesitant	Confident	Confident	Confident	Confident	Confident	Confident	Confident	Confident	Confident	Strongly Disagree	Strongly Disagree	Strongly Agree	Strongly Agree	Agree	Agree	Disagree	Strongly Disagree	Strongly Disagree	Strongly Agree	Nurse		Other	PACU	178	20-29 years	46 to 55 years old	College 4 years or more (college graduate)	Rural	Yes	White, European American, or European		Woman
Very Confident	Very Confident	Not Confident	Not Confident	Confident	Very Confident	Very Confident	Not Confident	Not Confident	Not Confident	Not Confident	Not Confident	Not Confident	Not Confident	Not Confident	Not Confident	Not Confident	Not Confident	Not Confident	Not Confident	Not Confident	Not Confident	Hesitant	Disagree	Disagree	Strongly Agree	Strongly Agree	Disagree	Disagree	Strongly Disagree	Strongly Disagree	Strongly Disagree	Agree	Nurse		Other	OR	178	10-19 years	26 to 35 years old	College 4 years or more (college graduate)	Rural	Yes	White, European American, or European		Woman
Confident	Hesitant	Confident	Hesitant	Confident	Very Confident	Very Confident	Hesitant	Confident	Hesitant	Confident	Hesitant	Hesitant	Hesitant	Hesitant	Hesitant	Confident	Hesitant	Confident	Confident		Hesitant	Confident	Disagree	Agree	Agree	Agree	Disagree	Agree	Disagree	Strongly Disagree	Agree	Agree	Nurse		Emergency		0	Fewer than 10 years	18 to 25 years old	College 4 years or more (college graduate)	Rural	Yes	White, European American, or European		Woman
Confident	Confident	Hesitant	Hesitant	Confident	Very Confident	Very Confident	Confident	Hesitant	Hesitant	Hesitant	Hesitant	Hesitant	Hesitant	Hesitant	Hesitant	Hesitant	Hesitant	Hesitant	Confident	Hesitant	Hesitant	Hesitant	Disagree	Disagree	Strongly Agree	Strongly Agree	Strongly Agree	Strongly Agree	Disagree	Disagree	Strongly Disagree	Strongly Agree	Physician		Other		178	Fewer than 10 years	26 to 35 years old	Advanced degree (Master's, Doctorate, etc.)	Rural	Yes	White, European American, or European		Woman
Very Confident	Hesitant	Hesitant	Hesitant	Very Confident	Confident	Confident	Confident	Hesitant	Hesitant	Hesitant	Not Confident	Not Confident	Not Confident	Not Confident	Not Confident	Not Confident	Hesitant	Hesitant	Hesitant	Hesitant	Hesitant	Hesitant	Disagree	Disagree	Agree	Disagree	Disagree	Agree	Disagree	Strongly Disagree	Strongly Disagree	Agree	Nurse		Pediatrics		170	30 years or more	46 to 55 years old	College 4 years or more (college graduate)	Rural	Yes	White, European American, or European		Woman
Hesitant	Not Confident	Hesitant	Not Confident	Not Confident	Hesitant	Hesitant	Not Confident	Not Confident	Not Confident	Not Confident	Not Confident	Not Confident	Not Confident	Not Confident	Not Confident	Not Confident	Not Confident	Not Confident	Not Confident	Not Confident	Not Confident	Not Confident	Disagree	Agree	Agree	Agree	Disagree	Disagree	Strongly Disagree	Disagree	Strongly Disagree	Strongly Disagree	Nurse		Other	community medicine	170	10-19 years	36 to 45 years old	College 4 years or more (college graduate)	Rural	Yes	White, European American, or European		Woman
Very Confident	Very Confident	Hesitant	Not Confident	Confident	Very Confident	Very Confident	Hesitant	Hesitant	Hesitant	Hesitant	Very Confident	Very Confident	Not Confident	Very Confident	Very Confident	Very Confident	Not Confident	Very Confident	Not Confident	Hesitant	Hesitant	Very Confident	Strongly Disagree	Disagree	Strongly Agree	Strongly Agree	Strongly Agree	Strongly Agree	Disagree	Agree	Strongly Disagree	Strongly Agree	Nurse		OB/GYN		178	30 years or more	56 to 65 years old	College 4 years or more (college graduate)	Rural	No	White, European American, or European		Woman
Confident	Hesitant	Not Confident	Not Confident	Hesitant	Hesitant	Confident	Not Confident	Not Confident	Hesitant	Hesitant	Not Confident	Not Confident	Not Confident	Not Confident	Not Confident	Not Confident	Not Confident	Not Confident	Not Confident	Not Confident	Not Confident	Not Confident	Disagree	Disagree	Agree	Agree	Agree	Agree	Strongly Disagree	Strongly Disagree	Strongly Disagree	Agree	Nurse		Other	Ophthalmolgy	178	10-19 years	26 to 35 years old	1 to 3 years after high school (some college, Associate's degree, or technical school)	Rural	Yes	White, European American, or European		Woman
Confident	Not Confident	Not Confident	Not Confident	Hesitant	Confident	Hesitant	Not Confident	Not Confident	Not Confident	Not Confident	Not Confident	Not Confident	Not Confident	Not Confident	Very Confident	Hesitant	Not Confident	Not Confident	Not Confident	Not Confident	Not Confident	Not Confident	Strongly Disagree	Disagree	Agree	Agree	Strongly Agree	Strongly Agree	Strongly Disagree	Strongly Disagree	Strongly Disagree	Strongly Agree	Nurse		Other	case manager	177	30 years or more	46 to 55 years old	College 4 years or more (college graduate)	Rural	Yes	White, European American, or European		Woman
Hesitant	Hesitant	Hesitant	Not Confident	Hesitant	Confident	Very Confident	Not Confident	Not Confident	Not Confident	Hesitant	Not Confident	Not Confident	Hesitant	Not Confident	Not Confident	Not Confident	Not Confident	Hesitant	Not Confident	Not Confident	Not Confident	Not Confident	Disagree	Disagree	Strongly Agree	Agree	Agree	Agree	Disagree	Disagree	Strongly Disagree	Agree	Physician		Other		178	10-19 years	36 to 45 years old	Advanced degree (Master's, Doctorate, etc.)	Rural	No	White, European American, or European		Man
Confident	Hesitant	Confident	Not Confident	Confident	Hesitant	Confident	Hesitant	Hesitant	Hesitant	Not Confident	Not Confident	Not Confident	Not Confident	Not Confident	Hesitant	Not Confident	Not Confident	Not Confident	Not Confident	Not Confident	Not Confident	Not Confident	Disagree	Disagree	Agree	Agree	Disagree	Agree	Strongly Disagree	Strongly Disagree	Strongly Disagree	Agree	Nurse		Prefer not to answer.		178	10-19 years	36 to 45 years old	College 4 years or more (college graduate)	Rural	Yes	White, European American, or European		Man
Hesitant	Hesitant	Hesitant	Not Confident	Not Confident	Hesitant	Hesitant	Not Confident	Not Confident	Not Confident	Hesitant	Not Confident	Not Confident	Not Confident	Not Confident	Not Confident	Not Confident	Not Confident	Hesitant	Not Confident	Not Confident	Not Confident	Not Confident	Disagree	Agree	Agree	Disagree	Disagree	Disagree	Disagree	Strongly Disagree	Strongly Disagree	Agree	Physician		Other		178	20-29 years	46 to 55 years old	Advanced degree (Master's, Doctorate, etc.)	Rural	Yes	White, European American, or European		Man
Hesitant	Not Confident	Not Confident	Not Confident	Not Confident	Not Confident	Not Confident	Not Confident	Not Confident	Not Confident	Not Confident	Not Confident	Not Confident	Not Confident	Not Confident	Not Confident	Not Confident	Not Confident	Not Confident	Not Confident	Not Confident	Not Confident	Not Confident	Strongly Disagree	Strongly Disagree	Agree	Agree	Disagree	Agree	Disagree	Disagree	Strongly Disagree	Disagree	Nurse	not direct care	Other		170	30 years or more	46 to 55 years old	Advanced degree (Master's, Doctorate, etc.)	Suburban	Yes	White, European American, or European		Woman
Confident	Hesitant	Hesitant	Not Confident	Not Confident	Not Confident	Not Confident	Not Confident	Not Confident	Confident	Hesitant	Not Confident	Not Confident	Not Confident	Not Confident	Not Confident	Not Confident	Very Confident	Very Confident	Hesitant	Not Confident	Not Confident	Hesitant	Strongly Disagree	Disagree	Agree	Strongly Agree	Strongly Agree	Strongly Agree	Strongly Disagree	Strongly Disagree	Strongly Disagree	Strongly Agree	Nurse		Emergency		187	10-19 years	46 to 55 years old	College 4 years or more (college graduate)	Suburban	Yes	White, European American, or European		Woman
Hesitant	Confident	Hesitant	Hesitant	Confident	Confident	Confident	Hesitant	Confident	Hesitant	Confident	Confident	Confident	Hesitant	Confident	Confident	Confident	Not Confident	Confident	Hesitant	Hesitant	Hesitant	Hesitant	Disagree	Agree	Agree	Agree	Agree	Agree	Disagree	Disagree	Disagree	Agree	Nurse			Med-Surg	178	30 years or more	56 to 65 years old	College 4 years or more (college graduate)	Rural	Yes	White, European American, or European		Woman
Confident	Confident	Hesitant	Hesitant	Hesitant	Confident	Confident	Not Confident	Not Confident	Not Confident	Not Confident	Not Confident	Not Confident	Not Confident	Not Confident	Not Confident	Not Confident	Not Confident	Not Confident	Not Confident	Not Confident	Not Confident	Not Confident	Strongly Disagree	Disagree	Strongly Agree	Agree	Agree	Agree	Strongly Disagree	Strongly Disagree	Strongly Disagree	Strongly Agree	Nurse		Other	Pain Clinic Woodbine	.	30 years or more	56 to 65 years old	1 to 3 years after high school (some college, Associate's degree, or technical school)	Rural	Yes	White, European American, or European		Woman
Confident	Confident	Hesitant	Hesitant	Hesitant	Hesitant	Hesitant	Hesitant	Hesitant	Hesitant	Hesitant	Very Confident	Hesitant	Hesitant	Hesitant	Hesitant	Hesitant	Hesitant	Hesitant	Hesitant	Not Confident	Hesitant	Not Confident	Agree	Disagree	Agree			Agree	Disagree	Strongly Disagree	Agree	Agree	Nurse		Other	Nursing Education	178	30 years or more	66 to 75 years old	Advanced degree (Master's, Doctorate, etc.)	Rural	Yes	White, European American, or European		Woman
Confident	Confident	Confident	Hesitant	Confident	Confident	Confident	Hesitant	Hesitant	Hesitant	Hesitant	Hesitant	Hesitant	Hesitant	Hesitant	Hesitant	Hesitant	Hesitant	Hesitant	Hesitant	Hesitant	Hesitant	Hesitant
Confident	Confident	Hesitant	Not Confident	Very Confident	Confident	Confident	Not Confident	Not Confident	Not Confident	Not Confident	Not Confident	Not Confident	Not Confident	Not Confident	Not Confident	Not Confident	Not Confident	Confident	Confident	Not Confident	Not Confident	Not Confident	Agree	Strongly Agree	Agree	Strongly Disagree	Strongly Disagree	Strongly Disagree	Strongly Disagree	Strongly Disagree	Strongly Disagree	Strongly Disagree	Nurse		Other	med surg	178	10-19 years	36 to 45 years old	College 4 years or more (college graduate)	Rural	Yes	White, European American, or European		Man
Confident	Hesitant	Hesitant	Not Confident	Not Confident	Hesitant	Hesitant	Hesitant	Hesitant	Hesitant	Hesitant	Not Confident	Not Confident	Not Confident	Not Confident	Not Confident	Not Confident	Not Confident	Not Confident	Hesitant	Hesitant	Hesitant	Hesitant	Disagree	Disagree	Agree	Agree	Agree	Agree	Strongly Disagree	Strongly Disagree	Strongly Disagree	Agree	Physician			Neurosurgery	178	Fewer than 10 years	26 to 35 years old	Advanced degree (Master's, Doctorate, etc.)	Rural	No	White, European American, or European		Man
Confident	Not Confident	Hesitant	Not Confident	Not Confident	Hesitant	Hesitant	Hesitant	Hesitant	Hesitant	Hesitant	Hesitant	Hesitant	Hesitant	Hesitant	Hesitant	Not Confident	Not Confident	Hesitant	Not Confident	Hesitant	Hesitant	Hesitant	Disagree	Agree	Agree	Agree	Agree	Agree	Disagree	Strongly Disagree	Strongly Disagree	Agree	Nurse		Pediatrics		178	Fewer than 10 years	26 to 35 years old	College 4 years or more (college graduate)	Rural	Yes	White, European American, or European		Woman
Hesitant	Hesitant	Hesitant	Not Confident	Not Confident	Not Confident	Not Confident	Not Confident	Not Confident	Not Confident	Not Confident	Not Confident	Not Confident	Not Confident	Not Confident	Not Confident	Not Confident	Not Confident	Not Confident	Not Confident	Not Confident	Not Confident	Not Confident	Strongly Disagree	Agree	Strongly Agree	Agree	Disagree	Agree	Disagree	Strongly Disagree	Strongly Disagree	Strongly Agree	Nurse	Clinic Nurse Supervisor	Other	orthopaedics	178	10-19 years	56 to 65 years old	Advanced degree (Master's, Doctorate, etc.)	Rural	Yes	White, European American, or European		Woman
Confident	Confident	Hesitant	Hesitant	Hesitant	Confident	Confident	Hesitant	Hesitant	Hesitant	Hesitant	Not Confident	Not Confident	Not Confident	Not Confident	Not Confident	Not Confident	Hesitant	Hesitant	Not Confident	Hesitant	Hesitant	Hesitant	Strongly Disagree	Strongly Disagree	Strongly Agree	Agree	Agree	Agree	Strongly Disagree	Disagree	Strongly Disagree	Agree	Nurse		Other	orthopaedics	.	20-29 years	36 to 45 years old	College 4 years or more (college graduate)	Rural	Yes	White, European American, or European		Woman
Confident	Confident	Confident	Confident	Confident	Confident	Confident	Confident	Hesitant	Hesitant	Hesitant	Hesitant	Hesitant	Hesitant	Hesitant	Hesitant	Hesitant	Hesitant	Hesitant	Hesitant	Hesitant	Hesitant	Hesitant	Agree	Agree	Agree	Agree	Agree	Agree	Agree	Agree	Agree	Agree	Nurse		Other			Fewer than 10 years	26 to 35 years old	Advanced degree (Master's, Doctorate, etc.)	Rural	Yes	White, European American, or European		Man
Confident	Hesitant	Confident	Very Confident	Very Confident	Very Confident	Very Confident	Hesitant	Not Confident	Not Confident	Not Confident	Not Confident	Not Confident	Not Confident	Not Confident	Not Confident	Not Confident	Not Confident	Hesitant	Not Confident	Not Confident	Not Confident	Confident	Strongly Disagree	Strongly Disagree	Strongly Agree	Agree	Agree	Agree	Strongly Disagree	Strongly Disagree	Strongly Disagree	Strongly Agree	Nurse		Other		178	10-19 years	36 to 45 years old	Advanced degree (Master's, Doctorate, etc.)	Rural	Yes	White, European American, or European		Woman
Hesitant	Hesitant	Hesitant	Hesitant	Hesitant	Hesitant	Hesitant	Not Confident	Not Confident	Not Confident	Not Confident	Not Confident	Not Confident	Not Confident	Not Confident	Not Confident	Not Confident	Not Confident	Not Confident	Not Confident	Not Confident	Not Confident	Not Confident	Strongly Disagree	Disagree	Disagree	Agree	Agree	Agree	Strongly Disagree	Strongly Disagree	Strongly Disagree	Strongly Agree	Nurse		Other	hem/onc	178	10-19 years	36 to 45 years old	College 4 years or more (college graduate)	Rural	Yes	White, European American, or European		Woman
Confident	Hesitant	Confident	Hesitant	Confident	Confident	Confident	Hesitant	Hesitant	Confident	Hesitant	Hesitant	Hesitant	Hesitant	Hesitant	Hesitant	Hesitant	Very Confident	Very Confident	Confident	Hesitant	Confident	Confident	Disagree	Disagree	Agree	Strongly Agree	Agree	Disagree	Strongly Disagree	Disagree	Strongly Disagree	Strongly Agree	Nurse		Emergency			10-19 years	46 to 55 years old	Prefer not to answer.	Prefer not to answer.	Yes	White, European American, or European		Woman
Confident	Not Confident	Confident	Hesitant	Hesitant	Hesitant	Hesitant	Not Confident	Not Confident	Hesitant	Hesitant	Not Confident	Not Confident	Not Confident	Not Confident	Not Confident	Hesitant	Not Confident	Confident	Not Confident	Hesitant	Not Confident	Hesitant	Strongly Disagree	Strongly Disagree	Strongly Agree	Agree	Agree	Agree	Disagree	Disagree	Disagree	Agree	Nurse		Other		178	20-29 years	46 to 55 years old	1 to 3 years after high school (some college, Associate's degree, or technical school)	Rural	Yes	White, European American, or European		Woman
Confident	Not Confident	Hesitant	Not Confident	Not Confident	Hesitant	Hesitant	Not Confident	Not Confident	Not Confident	Not Confident	Not Confident	Not Confident	Not Confident	Not Confident	Not Confident	Not Confident	Not Confident	Not Confident	Not Confident	Not Confident	Not Confident	Not Confident	Disagree	Disagree	Agree	Agree	Agree	Agree	Strongly Disagree	Strongly Disagree	Strongly Disagree	Agree	Nurse		Other		178	30 years or more	56 to 65 years old	1 to 3 years after high school (some college, Associate's degree, or technical school)	Rural	Yes	White, European American, or European		Woman
Hesitant	Not Confident	Not Confident	Not Confident	Not Confident	Not Confident	Not Confident	Not Confident	Not Confident	Not Confident	Not Confident	Not Confident	Not Confident	Not Confident	Hesitant	Not Confident	Hesitant	Not Confident	Not Confident	Hesitant	Hesitant	Not Confident	Not Confident	Strongly Disagree	Disagree	Agree	Agree	Strongly Agree	Agree	Disagree	Strongly Disagree	Strongly Disagree	Strongly Agree	Physician		Other	Medicine	178	Fewer than 10 years	26 to 35 years old	Advanced degree (Master's, Doctorate, etc.)	Suburban	No	Asian		Man
Hesitant	Hesitant	Hesitant	Not Confident	Not Confident	Hesitant	Hesitant	Not Confident	Not Confident	Hesitant	Not Confident	Not Confident	Not Confident	Not Confident	Not Confident	Not Confident	Not Confident	Not Confident	Hesitant	Not Confident	Not Confident	Not Confident	Not Confident	Disagree	Disagree	Agree	Agree	Agree	Agree	Disagree	Disagree	Disagree	Agree	Physician		Other	surgery	170	30 years or more	56 to 65 years old	Advanced degree (Master's, Doctorate, etc.)	Suburban	Yes	White, European American, or European		Woman
Confident	Hesitant	Confident	Hesitant	Confident	Confident	Confident	Hesitant	Hesitant	Not Confident	Not Confident	Not Confident	Not Confident	Not Confident	Not Confident	Not Confident	Not Confident	Not Confident	Not Confident	Not Confident	Not Confident	Not Confident	Hesitant	Disagree	Disagree	Agree	Agree	Agree	Agree	Disagree	Disagree	Strongly Disagree	Strongly Agree	Nurse		Other	cardiac	178	10-19 years	26 to 35 years old	College 4 years or more (college graduate)	Rural	Yes	White, European American, or European		Woman
Very Confident	Very Confident	Very Confident	Hesitant	Confident	Very Confident	Very Confident	Confident	Hesitant	Hesitant	Hesitant	Confident	Confident	Not Confident	Not Confident	Confident	Confident	Hesitant	Very Confident	Very Confident	Hesitant	Confident	Confident	Disagree	Disagree	Agree	Disagree	Disagree	Disagree	Agree	Disagree	Disagree	Agree	Nurse		Other	Trauma ICU	170	Fewer than 10 years	18 to 25 years old	College 4 years or more (college graduate)	Suburban	Yes	White, European American, or European		Woman
Confident	Hesitant	Hesitant	Not Confident	Hesitant	Confident	Confident	Not Confident	Not Confident	Not Confident	Not Confident	Not Confident	Not Confident	Not Confident	Not Confident	Not Confident	Not Confident	Not Confident	Hesitant	Not Confident	Not Confident	Not Confident	Not Confident	Disagree	Disagree	Strongly Agree	Agree	Disagree	Disagree	Strongly Disagree	Strongly Disagree	Strongly Disagree	Agree	Nurse		Other	Radiology	187	10-19 years	46 to 55 years old	College 4 years or more (college graduate)	Rural	Yes	White, European American, or European		Woman
Hesitant	Hesitant	Hesitant	Hesitant	Hesitant	Hesitant	Hesitant	Hesitant	Hesitant	Hesitant	Hesitant	Not Confident	Not Confident	Not Confident	Not Confident	Not Confident	Not Confident	Not Confident	Confident	Hesitant	Hesitant	Not Confident	Not Confident
Very Confident	Confident	Hesitant	Confident	Very Confident	Very Confident	Very Confident	Hesitant	Hesitant	Confident	Confident	Hesitant	Hesitant	Hesitant	Hesitant	Hesitant	Confident	Hesitant	Confident	Confident		Confident	Confident	Strongly Disagree	Strongly Disagree	Strongly Agree	Strongly Agree	Agree	Agree	Disagree	Disagree	Disagree	Strongly Agree	Nurse		Other	OR	170	30 years or more	56 to 65 years old	College 4 years or more (college graduate)	Suburban	Yes	White, European American, or European		Woman
Hesitant	Hesitant	Hesitant	Hesitant	Hesitant	Hesitant	Hesitant	Not Confident	Not Confident	Not Confident	Not Confident	Hesitant	Hesitant	Hesitant	Hesitant	Confident	Hesitant	Not Confident	Not Confident	Not Confident	Not Confident	Not Confident	Not Confident	Strongly Agree	Strongly Agree	Strongly Agree	Strongly Agree	Strongly Disagree	Strongly Agree	Strongly Disagree	Strongly Disagree	Strongly Disagree	Strongly Agree	Nurse		OB/GYN		178	30 years or more	56 to 65 years old	College 4 years or more (college graduate)	Rural	Yes	White, European American, or European		Woman
Hesitant	Hesitant	Not Confident	Not Confident	Not Confident	Confident	Confident	Not Confident	Hesitant	Not Confident	Not Confident	Not Confident	Not Confident	Not Confident	Not Confident	Not Confident	Not Confident	Not Confident	Not Confident	Not Confident	Not Confident	Not Confident	Hesitant	Agree	Agree	Agree	Agree	Agree	Agree	Strongly Disagree	Strongly Disagree	Strongly Disagree	Strongly Disagree	Physician		Other	medicine	178	30 years or more	46 to 55 years old	Advanced degree (Master's, Doctorate, etc.)	Rural	No	Hispanic, Latino, or Spanish		Man
Very Confident	Very Confident	Very Confident	Very Confident	Very Confident	Very Confident	Very Confident	Very Confident	Very Confident	Very Confident	Very Confident	Very Confident	Very Confident	Very Confident	Very Confident	Very Confident	Very Confident	Very Confident	Very Confident	Very Confident	Very Confident	Very Confident	Very Confident	Strongly Disagree	Strongly Disagree	Agree	Agree	Disagree	Agree	Strongly Agree	Strongly Disagree	Strongly Disagree	Disagree	Physician		Other	Anesthesiology	187	Fewer than 10 years	26 to 35 years old	Advanced degree (Master's, Doctorate, etc.)	Suburban	Yes	White, European American, or European		None of these fully describe me.	I am a Cis-gendered male who identifies more with Unicorns and Turtles than with humans so my sex is male but I do not consider myself a "man"... However I am attracted to females (human women).
Confident	Hesitant	Hesitant	Not Confident	Hesitant	Hesitant	Confident	Not Confident	Not Confident	Not Confident	Not Confident	Not Confident	Not Confident	Not Confident	Not Confident	Not Confident	Not Confident	Not Confident	Not Confident	Not Confident	Not Confident	Not Confident	Not Confident	Disagree	Disagree	Agree	Agree	Agree	Agree	Disagree	Disagree	Strongly Disagree	Agree	Nurse		Other	PACU	178	10-19 years	46 to 55 years old	1 to 3 years after high school (some college, Associate's degree, or technical school)	Rural	Yes	White, European American, or European		Man
Confident	Hesitant	Hesitant	Hesitant	Hesitant	Hesitant	Confident	Not Confident	Not Confident	Confident	Not Confident	Not Confident	Not Confident	Not Confident	Not Confident	Not Confident	Not Confident	Not Confident	Hesitant	Hesitant	Not Confident	Not Confident	Not Confident	Disagree	Agree	Agree	Agree	Agree	Agree	Strongly Disagree	Strongly Disagree	Strongly Disagree	Agree	Nurse			education	187	30 years or more	56 to 65 years old	1 to 3 years after high school (some college, Associate's degree, or technical school)	Suburban	Yes	White, European American, or European		Woman
Confident	Hesitant	Confident	Confident	Hesitant	Confident	Confident	Hesitant	Hesitant	Hesitant	Hesitant	Hesitant	Hesitant	Hesitant	Hesitant	Hesitant	Hesitant	Hesitant	Hesitant	Hesitant	Hesitant	Hesitant	Hesitant	Strongly Disagree	Strongly Disagree	Strongly Agree	Strongly Agree	Agree	Agree	Strongly Disagree	Disagree	Disagree	Strongly Agree	Nurse	RN Case Manager	Other	Outpatient Clinic - Medical Home	170	30 years or more	46 to 55 years old	Advanced degree (Master's, Doctorate, etc.)	Rural	Yes	White, European American, or European		Woman
Confident	Hesitant	Not Confident	Not Confident	Not Confident	Hesitant	Hesitant	Not Confident	Not Confident	Not Confident	Not Confident	Not Confident	Not Confident	Not Confident	Not Confident	Not Confident	Not Confident	Not Confident	Hesitant	Not Confident	Not Confident	Not Confident	Not Confident	Agree	Agree	Agree	Agree	Agree	Agree	Disagree	Strongly Disagree	Strongly Disagree	Agree	Physician		Other	int med/hosp med	178	20-29 years	46 to 55 years old	Advanced degree (Master's, Doctorate, etc.)	Rural	Yes	White, European American, or European		Man
Confident	Confident	Confident	Confident	Confident	Confident	Confident	Confident	Confident	Confident	Confident	Confident	Confident	Confident	Confident	Confident	Confident	Confident	Confident	Confident	Confident	Confident	Confident	Strongly Agree	Agree	Agree	Strongly Disagree	Strongly Disagree	Strongly Disagree	Agree	Agree	Strongly Disagree	Strongly Disagree	Physician		Emergency		178	10-19 years	26 to 35 years old	Advanced degree (Master's, Doctorate, etc.)	Rural	Yes	White, European American, or European		Man
Very Confident	Hesitant	Not Confident	Not Confident	Very Confident	Very Confident	Very Confident	Very Confident	Confident	Very Confident	Hesitant	Hesitant	Not Confident	Not Confident	Not Confident	Not Confident	Confident	Not Confident	Not Confident	Not Confident	Not Confident	Not Confident	Confident	Strongly Disagree	Agree	Agree	Agree	Agree	Disagree	Strongly Disagree	Strongly Disagree	Strongly Disagree	Disagree	Nurse		Other	pacu	178	30 years or more	56 to 65 years old	1 to 3 years after high school (some college, Associate's degree, or technical school)	Rural	Yes	White, European American, or European		Woman
Confident	Hesitant	Not Confident	Not Confident	Hesitant	Hesitant	Hesitant	Hesitant	Hesitant	Hesitant	Not Confident	Not Confident	Not Confident	Not Confident	Not Confident	Not Confident	Not Confident	Not Confident	Confident	Not Confident	Not Confident	Hesitant	Hesitant	Disagree	Agree	Agree	Agree	Disagree	Agree	Strongly Disagree	Disagree	Disagree	Agree	Nurse		Emergency		187	10-19 years	36 to 45 years old	College 4 years or more (college graduate)	Suburban	Yes	White, European American, or European		Woman
Confident	Hesitant	Confident	Hesitant	Very Confident	Very Confident	Very Confident	Hesitant	Hesitant	Hesitant	Hesitant	Hesitant	Hesitant	Hesitant	Hesitant	Hesitant	Hesitant	Hesitant	Confident	Confident	Hesitant	Confident	Confident	Disagree	Strongly Disagree	Disagree	Disagree	Agree	Agree	Strongly Disagree	Disagree	Disagree	Strongly Agree	Nurse		Other	surgery	170	30 years or more	56 to 65 years old	1 to 3 years after high school (some college, Associate's degree, or technical school)	Rural	Yes	White, European American, or European		Woman
Very Confident	Very Confident	Hesitant	Hesitant	Confident	Very Confident	Very Confident	Not Confident	Not Confident	Not Confident	Not Confident	Very Confident	Hesitant	Not Confident	Not Confident	Very Confident	Very Confident	Not Confident	Very Confident	Not Confident	Not Confident	Not Confident	Not Confident	Strongly Disagree	Agree	Strongly Agree	Agree	Strongly Agree	Strongly Agree	Strongly Disagree	Strongly Disagree	Strongly Disagree	Agree	Nurse			case managment	187	30 years or more	46 to 55 years old	1 to 3 years after high school (some college, Associate's degree, or technical school)	Suburban	Yes	White, European American, or European		Woman
Confident	Hesitant	Hesitant	Not Confident	Hesitant	Hesitant	Hesitant	Not Confident	Not Confident	Not Confident	Not Confident	Not Confident	Not Confident	Not Confident	Not Confident	Not Confident	Not Confident	Not Confident	Not Confident	Not Confident	Confident	Not Confident	Not Confident	Agree	Disagree	Agree	Agree	Agree	Agree	Disagree	Disagree	Disagree	Strongly Agree	Physician		OB/GYN		186	20-29 years	46 to 55 years old	Advanced degree (Master's, Doctorate, etc.)	Rural	Yes	White, European American, or European		Man
Confident	Confident	Hesitant	Not Confident	Not Confident	Confident	Hesitant	Hesitant	Hesitant	Confident	Confident	Not Confident	Not Confident	Not Confident	Not Confident	Not Confident	Not Confident	Not Confident	Confident	Hesitant	Confident	Confident	Hesitant	Strongly Disagree	Disagree	Agree	Agree	Agree	Agree	Disagree	Disagree	Strongly Disagree	Agree	Nurse		Pediatrics		178	30 years or more	56 to 65 years old	1 to 3 years after high school (some college, Associate's degree, or technical school)	Rural	Yes	White, European American, or European		Woman
Confident	Confident	Hesitant	Not Confident	Hesitant	Confident	Confident	Not Confident	Not Confident	Not Confident	Hesitant	Not Confident	Not Confident	Not Confident	Not Confident	Not Confident	Not Confident	Not Confident	Not Confident	Not Confident	Not Confident	Hesitant	Not Confident	Strongly Disagree	Strongly Disagree	Strongly Agree	Disagree	Agree	Agree	Strongly Disagree	Strongly Disagree	Strongly Disagree	Strongly Agree	Nurse		Other	Recovery room	178	30 years or more	56 to 65 years old	1 to 3 years after high school (some college, Associate's degree, or technical school)	Rural	Yes	White, European American, or European		Woman
Confident	Not Confident	Not Confident	Not Confident	Not Confident	Not Confident	Confident	Hesitant	Not Confident	Hesitant	Hesitant	Not Confident	Not Confident	Not Confident	Not Confident	Not Confident	Not Confident	Hesitant	Confident	Confident	Confident	Hesitant	Not Confident	Strongly Disagree	Disagree	Agree	Agree	Agree	Agree	Disagree	Disagree	Disagree	Agree	Nurse		Other		178	30 years or more	56 to 65 years old	Advanced degree (Master's, Doctorate, etc.)	Rural	Yes	White, European American, or European		Woman
Very Confident	Hesitant	Hesitant	Hesitant	Confident	Confident	Confident	Not Confident	Not Confident	Not Confident	Not Confident	Not Confident	Not Confident	Not Confident	Not Confident	Not Confident	Not Confident	Not Confident	Not Confident	Not Confident	Not Confident	Not Confident	Not Confident
Confident	Confident	Hesitant	Very Confident	Very Confident	Very Confident	Very Confident	Confident	Confident	Confident	Confident	Confident	Confident	Hesitant	Hesitant	Confident	Confident	Confident	Confident	Confident	Confident	Confident	Confident	Strongly Disagree	Strongly Disagree	Agree	Disagree	Agree	Agree	Agree	Disagree	Agree	Disagree	Physician		Emergency		178	20-29 years	46 to 55 years old	Advanced degree (Master's, Doctorate, etc.)	Rural	Yes	White, European American, or European		Man
Confident	Confident	Not Confident	Not Confident	Not Confident	Confident	Confident	Not Confident	Not Confident	Not Confident	Not Confident	Not Confident	Not Confident	Not Confident	Not Confident	Not Confident		Not Confident	Very Confident	Hesitant	Confident	Confident	Confident	Strongly Disagree	Disagree	Agree	Agree	Agree	Agree	Strongly Disagree	Strongly Disagree	Strongly Disagree	Agree	Nurse		Other		178	30 years or more	56 to 65 years old	College 4 years or more (college graduate)	Rural	Yes	White, European American, or European		Woman
Confident	Hesitant	Not Confident	Not Confident	Hesitant	Confident	Confident	Not Confident	Not Confident	Not Confident	Not Confident	Not Confident	Not Confident	Not Confident	Not Confident	Not Confident	Not Confident	Very Confident	Hesitant	Not Confident	Very Confident	Hesitant	Hesitant	Disagree	Disagree	Agree	Disagree	Agree	Disagree	Disagree	Disagree	Disagree	Agree	Physician		OB/GYN		187	30 years or more	56 to 65 years old	Advanced degree (Master's, Doctorate, etc.)	Suburban	Yes	White, European American, or European		Man
Very Confident	Very Confident	Very Confident	Very Confident	Very Confident	Very Confident	Very Confident	Very Confident	Confident	Confident	Very Confident	Hesitant	Hesitant	Hesitant	Hesitant	Hesitant	Confident	Confident	Very Confident	Very Confident	Confident	Confident	Very Confident	Strongly Disagree	Strongly Disagree	Strongly Agree	Agree	Agree	Agree	Disagree	Disagree	Strongly Agree	Agree	Physician		Other	academic medicine	185	30 years or more	56 to 65 years old	Advanced degree (Master's, Doctorate, etc.)	Suburban	Yes	White, European American, or European		Woman
Confident	Confident	Hesitant	Hesitant	Hesitant	Confident	Confident	Confident	Confident	Hesitant	Confident	Hesitant	Hesitant	Hesitant	Hesitant	Hesitant	Hesitant	Confident	Confident	Confident	Confident	Confident	Confident	Strongly Disagree	Disagree	Agree	Disagree	Disagree	Disagree	Agree	Disagree	Disagree	Disagree	Nurse		Other	Home health	178	30 years or more	56 to 65 years old	College 4 years or more (college graduate)	Rural	Yes	White, European American, or European		Woman
Confident	Not Confident	Not Confident	Not Confident	Hesitant	Confident	Confident	Hesitant	Hesitant	Hesitant	Hesitant	Hesitant	Hesitant	Hesitant	Hesitant	Hesitant	Hesitant	Hesitant	Hesitant	Hesitant	Hesitant	Confident	Hesitant	Disagree	Agree	Agree	Agree	Disagree	Disagree	Disagree	Strongly Disagree	Strongly Disagree	Agree	Nurse		Other	VAT	.	30 years or more	56 to 65 years old	1 to 3 years after high school (some college, Associate's degree, or technical school)	Prefer not to answer.	Yes	White, European American, or European		Woman
Confident	Confident	Confident	Hesitant	Confident	Confident	Confident	Hesitant	Hesitant	Hesitant	Not Confident	Hesitant	Hesitant	Hesitant	Hesitant	Hesitant	Hesitant	Not Confident	Very Confident	Hesitant	Confident	Hesitant	Hesitant	Strongly Disagree	Strongly Disagree	Strongly Agree	Agree	Agree	Disagree	Strongly Disagree	Disagree	Strongly Disagree	Strongly Agree	Physician		Other	Neurology	178	10-19 years	56 to 65 years old	Advanced degree (Master's, Doctorate, etc.)	Suburban	Yes	White, European American, or European	You can not choose two, other is Native American	Woman
Hesitant	Hesitant	Hesitant	Not Confident	Not Confident	Confident	Hesitant	Not Confident	Not Confident	Not Confident	Not Confident	Not Confident	Not Confident	Not Confident	Not Confident	Not Confident	Not Confident	Not Confident	Not Confident	Not Confident	Not Confident	Not Confident	Not Confident	Disagree	Agree	Agree	Agree	Disagree	Disagree	Disagree	Strongly Disagree	Strongly Disagree	Agree	Nurse		Other	Outpatient Cardiology	171	10-19 years	26 to 35 years old	College 4 years or more (college graduate)	Rural	Yes	White, European American, or European		Woman
Confident	Confident	Confident	Hesitant	Hesitant	Confident	Confident	Hesitant	Hesitant	Hesitant	Hesitant	Not Confident	Not Confident	Not Confident	Not Confident	Not Confident	Not Confident	Not Confident	Not Confident	Not Confident	Not Confident		Not Confident	Strongly Disagree	Strongly Disagree	Strongly Agree	Agree	Strongly Agree	Agree	Strongly Disagree	Strongly Disagree	Strongly Disagree	Strongly Agree	Nurse		Other		187	30 years or more	56 to 65 years old	1 to 3 years after high school (some college, Associate's degree, or technical school)	Rural	Yes	White, European American, or European		Woman
Confident	Hesitant	Hesitant	Hesitant	Hesitant	Hesitant	Hesitant	Hesitant	Hesitant	Hesitant	Confident	Hesitant	Hesitant	Hesitant	Hesitant	Hesitant	Hesitant	Hesitant	Hesitant	Hesitant	Hesitant	Hesitant	Hesitant	Disagree	Agree	Agree	Agree	Agree	Agree	Disagree	Disagree	Disagree	Agree	Nurse		OB/GYN		178	10-19 years	36 to 45 years old	1 to 3 years after high school (some college, Associate's degree, or technical school)	Rural	Yes	White, European American, or European		Woman
Confident	Confident	Confident	Hesitant	Confident	Confident	Confident	Confident	Confident	Hesitant	Confident	Hesitant	Hesitant	Hesitant	Hesitant	Hesitant	Hesitant	Hesitant	Confident	Hesitant	Confident	Confident	Confident	Disagree	Disagree	Agree	Agree	Agree	Agree	Agree	Strongly Disagree	Disagree	Agree	Nurse		Other	critical care		30 years or more	66 to 75 years old	1 to 3 years after high school (some college, Associate's degree, or technical school)	Rural	Yes	White, European American, or European		Woman
Confident	Confident	Hesitant	Not Confident	Hesitant	Confident	Confident	Hesitant	Hesitant	Not Confident	Hesitant	Not Confident	Not Confident	Not Confident	Not Confident	Not Confident	Not Confident	Not Confident	Confident	Not Confident	Not Confident	Not Confident	Hesitant	Disagree	Disagree	Agree	Agree	Agree	Agree	Disagree	Strongly Disagree	Strongly Disagree	Agree	Nurse		OB/GYN		178	10-19 years	26 to 35 years old	College 4 years or more (college graduate)	Rural	Yes	White, European American, or European		Woman
Confident	Confident	Not Confident	Confident	Confident	Confident	Confident	Not Confident	Not Confident	Not Confident	Not Confident	Confident	Confident	Confident	Confident	Confident	Confident	Not Confident	Confident	Confident	Confident	Confident	Confident	Strongly Disagree	Disagree	Disagree	Strongly Agree	Strongly Agree	Strongly Agree	Strongly Disagree	Strongly Disagree	Strongly Disagree	Agree	Nurse		Other	Care Management	178	20-29 years	46 to 55 years old	1 to 3 years after high school (some college, Associate's degree, or technical school)	Rural	Yes	White, European American, or European		Man
Confident	Confident	Confident	Hesitant	Hesitant	Very Confident	Very Confident	Confident	Hesitant	Hesitant	Confident	Confident	Confident	Confident	Confident	Confident	Hesitant	Hesitant	Hesitant	Hesitant	Confident	Confident	Confident	Strongly Disagree	Strongly Disagree	Disagree	Agree	Agree	Agree	Disagree	Disagree	Disagree	Agree	Nurse		Other	OR	178	Fewer than 10 years	26 to 35 years old	College 4 years or more (college graduate)	Suburban	Yes	White, European American, or European		Woman
Not Confident	Not Confident	Confident	Very Confident	Confident	Very Confident	Very Confident	Not Confident	Not Confident	Not Confident	Not Confident	Not Confident	Not Confident	Not Confident	Not Confident	Not Confident	Not Confident	Not Confident	Not Confident	Not Confident	Not Confident	Not Confident	Not Confident	Disagree	Strongly Disagree	Strongly Agree	Disagree	Agree	Strongly Agree	Disagree	Strongly Disagree	Strongly Disagree	Agree	Physician		Other	Palliative IP	170	30 years or more	66 to 75 years old	Advanced degree (Master's, Doctorate, etc.)	Rural	Yes	White, European American, or European		Woman
Confident	Confident	Hesitant	Hesitant	Hesitant	Confident	Confident	Hesitant	Hesitant	Hesitant	Confident	Hesitant	Hesitant	Hesitant	Hesitant	Hesitant	Hesitant	Hesitant	Hesitant	Hesitant	Hesitant	Hesitant	Hesitant	Strongly Disagree	Strongly Disagree	Agree	Agree	Agree	Agree	Strongly Disagree	Disagree	Strongly Disagree	Strongly Agree	Nurse		OB/GYN		178	Fewer than 10 years	36 to 45 years old	College 4 years or more (college graduate)	Rural	Yes	White, European American, or European		Woman
Very Confident	Very Confident	Confident	Hesitant	Hesitant	Confident	Very Confident	Hesitant	Hesitant	Not Confident	Not Confident	Not Confident	Not Confident	Not Confident	Not Confident	Not Confident	Not Confident	Not Confident	Very Confident	Hesitant	Very Confident	Hesitant	Very Confident	Disagree	Agree	Strongly Agree	Agree	Agree	Disagree	Disagree	Strongly Disagree	Strongly Disagree	Agree	Nurse		Other		170	20-29 years	46 to 55 years old	College 4 years or more (college graduate)	Rural	Yes	White, European American, or European		Woman
Confident	Confident	Very Confident	Confident	Confident	Very Confident	Very Confident	Confident	Confident	Confident	Hesitant	Hesitant	Confident	Hesitant	Hesitant	Confident	Hesitant	Hesitant	Confident	Hesitant	Confident	Confident	Confident	Strongly Disagree	Strongly Disagree	Agree		Strongly Disagree	Strongly Disagree	Agree	Strongly Agree	Strongly Agree	Disagree	Nurse		Emergency		170	30 years or more	46 to 55 years old	College 4 years or more (college graduate)	Suburban	Yes	White, European American, or European		Woman
Very Confident	Very Confident	Hesitant	Hesitant	Confident	Confident	Confident	Confident	Confident	Confident	Confident	Very Confident	Very Confident	Hesitant	Hesitant	Very Confident	Confident	Hesitant	Confident	Hesitant	Hesitant	Confident	Confident	Strongly Disagree	Disagree	Strongly Agree	Agree	Agree	Disagree	Disagree	Disagree	Disagree	Strongly Agree	Nurse		Other	Nurse Family Partnership Home Visitor, Nurse	178	10-19 years	36 to 45 years old	College 4 years or more (college graduate)	Rural	Yes	White, European American, or European		Woman
Hesitant	Hesitant	Hesitant	Hesitant	Hesitant	Hesitant	Hesitant	Hesitant	Hesitant	Hesitant	Hesitant	Hesitant	Hesitant	Hesitant	Hesitant	Hesitant	Hesitant	Hesitant	Hesitant	Hesitant	Hesitant	Hesitant	Confident	Disagree	Disagree	Agree	Disagree	Agree	Agree	Disagree	Disagree	Disagree	Agree	Physician		Other	urology		Fewer than 10 years	26 to 35 years old	Advanced degree (Master's, Doctorate, etc.)	Rural	Yes	White, European American, or European		Woman
Confident	Hesitant	Not Confident	Not Confident		Hesitant	Hesitant	Hesitant	Hesitant	Hesitant	Hesitant	Not Confident	Not Confident	Not Confident	Not Confident	Not Confident	Not Confident	Not Confident	Not Confident	Not Confident	Not Confident	Not Confident	Not Confident	Agree	Disagree	Strongly Agree	Agree	Agree	Agree	Strongly Disagree	Strongly Agree	Strongly Disagree	Agree	Nurse		Emergency		178	20-29 years	46 to 55 years old	1 to 3 years after high school (some college, Associate's degree, or technical school)	Rural	Yes	White, European American, or European		Woman
Very Confident	Confident	Hesitant	Confident	Confident	Confident	Confident	Hesitant	Hesitant	Hesitant	Hesitant	Hesitant	Hesitant	Hesitant	Hesitant	Hesitant	Hesitant	Hesitant	Very Confident	Confident	Confident	Confident	Confident	Strongly Disagree	Disagree	Agree	Agree	Agree	Disagree	Agree	Disagree	Disagree	Agree	Nurse		Other		168	30 years or more	56 to 65 years old	College 4 years or more (college graduate)	Suburban	Yes	White, European American, or European		Woman
Confident	Hesitant	Hesitant	Hesitant	Hesitant	Confident	Confident	Hesitant	Hesitant	Hesitant	Hesitant	Not Confident	Not Confident	Not Confident	Hesitant	Hesitant	Hesitant	Hesitant	Confident	Confident	Confident	Confident	Confident	Disagree	Agree	Agree	Agree	Agree	Agree	Disagree	Strongly Disagree	Strongly Disagree	Agree	Nurse		Other		178	10-19 years	36 to 45 years old	College 4 years or more (college graduate)	Rural	Yes	White, European American, or European		Woman
Hesitant	Hesitant	Hesitant	Hesitant	Hesitant	Confident	Confident	Not Confident	Not Confident	Not Confident	Confident	Not Confident	Not Confident	Not Confident	Not Confident	Not Confident	Not Confident	Not Confident	Hesitant	Not Confident	Hesitant	Not Confident	Hesitant
Hesitant	Not Confident	Not Confident	Not Confident	Not Confident	Hesitant	Hesitant	Hesitant	Hesitant	Hesitant	Confident	Hesitant	Hesitant	Hesitant	Hesitant	Hesitant	Hesitant	Hesitant	Hesitant	Hesitant	Hesitant	Hesitant	Hesitant	Strongly Disagree	Strongly Disagree	Agree	Agree	Agree	Agree	Disagree	Disagree	Strongly Disagree	Strongly Disagree	Nurse		Other	inpatient medical surgical setting	178	20-29 years	36 to 45 years old	Advanced degree (Master's, Doctorate, etc.)	Rural	Yes	White, European American, or European		Woman
Confident	Hesitant	Hesitant	Not Confident	Not Confident	Hesitant	Not Confident	Not Confident	Not Confident	Not Confident	Not Confident	Not Confident	Not Confident	Not Confident	Not Confident	Not Confident	Not Confident	Not Confident	Hesitant	Not Confident	Not Confident	Not Confident	Not Confident	Strongly Disagree	Disagree	Agree	Agree	Strongly Disagree	Strongly Disagree		Strongly Disagree	Strongly Disagree	Agree	Nurse		Other		178	20-29 years	36 to 45 years old	1 to 3 years after high school (some college, Associate's degree, or technical school)	Rural	Yes	White, European American, or European		Woman
Confident	Confident	Confident	Not Confident	Confident	Hesitant	Hesitant	Hesitant	Hesitant	Hesitant	Hesitant	Not Confident	Hesitant	Not Confident	Not Confident	Not Confident	Not Confident	Hesitant	Hesitant	Hesitant	Hesitant	Hesitant	Hesitant	Disagree	Disagree	Agree	Agree	Agree	Agree	Disagree	Disagree	Disagree	Agree	Physician		Emergency		178	10-19 years	36 to 45 years old	Advanced degree (Master's, Doctorate, etc.)	Rural	Yes	White, European American, or European		Woman
Hesitant	Not Confident	Hesitant	Not Confident	Hesitant	Hesitant	Hesitant	Not Confident	Not Confident	Not Confident	Not Confident	Not Confident	Not Confident	Not Confident	Not Confident	Not Confident	Not Confident	Not Confident	Not Confident	Not Confident	Not Confident	Not Confident	Not Confident	Strongly Disagree	Disagree	Strongly Agree	Agree	Agree	Agree	Strongly Disagree	Strongly Disagree	Strongly Disagree	Agree	Nurse		Other		185	30 years or more	56 to 65 years old	1 to 3 years after high school (some college, Associate's degree, or technical school)	Suburban	Yes	White, European American, or European		Woman
Confident	Hesitant	Hesitant	Not Confident	Confident	Very Confident	Very Confident	Hesitant	Hesitant	Hesitant	Hesitant	Not Confident	Not Confident	Not Confident	Not Confident	Not Confident	Not Confident	Not Confident	Hesitant	Not Confident	Not Confident	Not Confident	Hesitant	Disagree	Disagree	Strongly Agree	Strongly Agree	Strongly Agree	Strongly Agree	Strongly Disagree	Strongly Disagree	Strongly Disagree	Agree	Physician	REDACTED	Other	Radiology	178	Fewer than 10 years	36 to 45 years old	Advanced degree (Master's, Doctorate, etc.)	Rural	Yes	White, European American, or European		Man
Hesitant	Hesitant	Not Confident		Very Confident	Confident	Confident	Not Confident	Not Confident	Not Confident	Not Confident	Not Confident	Not Confident	Not Confident	Not Confident	Not Confident	Not Confident	Not Confident	Not Confident	Not Confident	Not Confident	Not Confident	Hesitant	Disagree	Disagree	Strongly Agree	Agree	Strongly Agree	Strongly Agree	Agree	Strongly Disagree	Strongly Disagree	Disagree	Physician		Other	Womens Imaging	187	30 years or more	66 to 75 years old	Advanced degree (Master's, Doctorate, etc.)	Rural	Yes	White, European American, or European		Man
Very Confident	Very Confident	Confident	Confident	Confident	Confident	Confident	Confident	Hesitant	Hesitant	Hesitant	Hesitant	Hesitant	Hesitant	Hesitant	Hesitant	Hesitant	Hesitant	Confident	Confident	Confident	Confident	Hesitant	Disagree	Disagree	Agree	Agree	Strongly Agree	Agree	Disagree	Strongly Disagree	Strongly Disagree	Disagree	Nurse		Other	Surgery	170	30 years or more	56 to 65 years old	College 4 years or more (college graduate)	Rural	Yes	White, European American, or European		Man
Confident	Confident	Hesitant	Not Confident	Hesitant	Confident	Confident	Hesitant	Hesitant	Hesitant	Hesitant	Not Confident	Hesitant	Not Confident	Hesitant	Hesitant	Hesitant	Not Confident	Confident	Hesitant	Hesitant	Confident	Confident	Strongly Disagree	Agree	Agree	Agree	Strongly Agree	Agree	Disagree	Disagree	Strongly Disagree	Agree	Nurse		Other		178	10-19 years	36 to 45 years old	1 to 3 years after high school (some college, Associate's degree, or technical school)	Suburban	Yes	White, European American, or European		Woman
Hesitant
Very Confident	Confident	Hesitant	Not Confident	Hesitant	Hesitant	Confident	Not Confident	Not Confident	Not Confident	Hesitant	Hesitant	Hesitant	Not Confident	Hesitant	Hesitant	Confident	Hesitant	Hesitant	Hesitant	Hesitant	Hesitant	Hesitant	Disagree	Disagree	Agree	Agree	Disagree	Agree	Disagree	Disagree	Disagree	Agree	Nurse		Other	Nursing School	170	20-29 years	56 to 65 years old	Advanced degree (Master's, Doctorate, etc.)	Rural	Yes	White, European American, or European		Woman
Very Confident	Very Confident	Very Confident	Very Confident	Very Confident	Very Confident	Very Confident	Very Confident	Very Confident	Very Confident	Very Confident	Confident	Confident	Confident	Confident	Confident	Confident	Hesitant	Very Confident	Confident	Confident	Confident	Confident	Agree	Agree	Agree	Agree	Agree	Strongly Disagree	Agree	Strongly Disagree	Agree	Agree	Nurse		Other	Intensive Care	178	Fewer than 10 years	18 to 25 years old	College 4 years or more (college graduate)	Rural	Yes	White, European American, or European		Man
Confident	Not Confident	Not Confident	Confident	Confident	Hesitant	Hesitant	Not Confident	Not Confident	Not Confident	Not Confident	Not Confident	Not Confident	Not Confident	Not Confident	Hesitant	Not Confident	Not Confident	Not Confident	Not Confident	Not Confident	Not Confident	Not Confident	Strongly Disagree	Strongly Disagree	Strongly Agree	Agree	Agree	Agree	Strongly Disagree	Strongly Disagree	Agree	Strongly Agree	Nurse		OB/GYN		186	30 years or more	46 to 55 years old	College 4 years or more (college graduate)	Rural	Yes	White, European American, or European		Woman
Very Confident	Confident	Hesitant	Hesitant	Hesitant	Hesitant	Hesitant	Confident	Confident	Confident	Confident	Not Confident	Not Confident	Not Confident	Not Confident	Not Confident	Not Confident	Confident	Confident	Hesitant	Hesitant	Hesitant	Hesitant	Disagree	Disagree	Agree	Agree	Strongly Agree	Strongly Agree	Disagree	Disagree	Strongly Disagree	Agree	Nurse		Other	Trauma	178	30 years or more	56 to 65 years old	College 4 years or more (college graduate)	Rural	Yes	White, European American, or European		Woman
Confident	Hesitant	Confident	Confident	Confident	Confident	Confident	Hesitant	Not Confident	Not Confident	Not Confident	Not Confident	Not Confident	Not Confident	Not Confident	Not Confident	Not Confident	Not Confident	Not Confident	Not Confident	Not Confident	Not Confident	Not Confident	Strongly Disagree	Agree	Strongly Agree	Agree	Agree	Agree	Strongly Disagree	Strongly Disagree	Strongly Disagree	Strongly Agree	Nurse		Other		170	10-19 years	56 to 65 years old	1 to 3 years after high school (some college, Associate's degree, or technical school)	Rural	Yes	White, European American, or European		Woman
Hesitant	Hesitant	Hesitant	Not Confident	Hesitant	Hesitant	Hesitant	Not Confident	Not Confident	Not Confident	Not Confident	Not Confident	Not Confident	Not Confident	Not Confident	Not Confident	Not Confident	Not Confident	Not Confident	Not Confident	Not Confident	Not Confident	Not Confident	Disagree	Disagree	Agree	Agree	Agree	Agree	Strongly Disagree	Strongly Disagree	Strongly Disagree	Agree	Nurse		Pediatrics		178	Fewer than 10 years	26 to 35 years old	1 to 3 years after high school (some college, Associate's degree, or technical school)	Rural	Yes	White, European American, or European		Woman
Confident	Hesitant	Hesitant	Not Confident	Hesitant	Hesitant	Confident	Not Confident	Not Confident	Hesitant	Hesitant	Not Confident	Not Confident	Not Confident	Not Confident	Not Confident	Not Confident	Not Confident	Confident	Not Confident	Hesitant	Hesitant	Hesitant	Disagree	Disagree	Agree	Agree	Agree	Agree	Disagree	Strongly Disagree	Strongly Disagree	Strongly Agree	Nurse		Other	SCU	178	30 years or more	56 to 65 years old	College 4 years or more (college graduate)	Suburban	Yes	White, European American, or European		Man
Very Confident	Very Confident	Not Confident	Confident	Confident	Confident	Confident	Confident	Confident	Confident	Confident	Confident	Confident	Confident	Confident	Confident	Confident	Confident	Confident	Confident	Confident	Confident	Confident	Strongly Disagree	Strongly Disagree	Agree	Strongly Agree	Disagree	Disagree	Disagree	Disagree	Disagree	Disagree	Nurse		Other	nicu		Fewer than 10 years	18 to 25 years old	Advanced degree (Master's, Doctorate, etc.)	Suburban	Yes	White, European American, or European		Woman
Confident	Confident	Confident	Hesitant	Confident	Hesitant	Hesitant	Confident	Hesitant	Hesitant	Hesitant	Hesitant	Hesitant	Hesitant	Hesitant	Hesitant	Confident	Confident	Hesitant	Hesitant	Confident	Hesitant	Hesitant	Agree	Agree	Agree	Disagree	Agree	Disagree	Agree	Agree	Agree	Agree	Nurse		Prefer not to answer.		178	20-29 years	56 to 65 years old	College 4 years or more (college graduate)	Prefer not to answer.	No	Middle Eastern or North African		None of these fully describe me.
Not Confident	Not Confident	Hesitant	Hesitant	Very Confident	Hesitant	Confident	Not Confident	Not Confident	Not Confident	Not Confident	Not Confident	Not Confident	Not Confident	Not Confident	Not Confident	Not Confident	Not Confident	Not Confident	Not Confident	Not Confident	Not Confident	Confident	Disagree	Strongly Disagree	Agree	Strongly Agree	Agree	Agree	Strongly Disagree	Disagree	Strongly Disagree	Agree	Nurse		Other		178	Fewer than 10 years	36 to 45 years old	1 to 3 years after high school (some college, Associate's degree, or technical school)	Rural	Yes	White, European American, or European		Man	Born with a penis, THAT MAKES ME A MAN regardless of how people want to "self-identify"
Very Confident	Very Confident	Not Confident	Not Confident	Not Confident	Not Confident	Hesitant	Not Confident	Not Confident	Not Confident	Not Confident	Not Confident	Not Confident	Not Confident	Not Confident	Not Confident	Not Confident	Not Confident	Not Confident	Not Confident	Not Confident	Not Confident	Not Confident	Strongly Disagree	Strongly Disagree	Strongly Agree	Strongly Agree	Strongly Agree	Strongly Agree	Strongly Disagree	Strongly Disagree	Strongly Disagree	Strongly Agree	Nurse			School of Nursing	170	20-29 years	46 to 55 years old	Advanced degree (Master's, Doctorate, etc.)	Rural	Yes	White, European American, or European		Woman
Very Confident	Confident	Confident	Hesitant	Hesitant	Confident	Confident	Hesitant	Confident	Hesitant	Hesitant	Hesitant	Hesitant	Hesitant	Hesitant	Hesitant	Hesitant	Hesitant	Hesitant	Confident	Hesitant	Hesitant	Confident	Disagree	Strongly Disagree	Agree	Agree	Strongly Agree	Disagree	Strongly Disagree	Strongly Disagree	Strongly Disagree	Strongly Agree	Nurse		Other	Med/Surg and ICU	187	10-19 years	26 to 35 years old	College 4 years or more (college graduate)	Urban	Yes	White, European American, or European		Woman
Hesitant	Not Confident	Hesitant	Not Confident	Not Confident	Hesitant	Hesitant	Hesitant	Not Confident	Hesitant	Hesitant	Not Confident	Not Confident	Not Confident	Not Confident	Not Confident	Not Confident	Not Confident	Not Confident	Not Confident	Not Confident	Not Confident	Hesitant	Strongly Disagree	Strongly Disagree	Strongly Agree	Agree	Agree	Agree	Disagree	Disagree	Disagree	Agree	Nurse		Other	Case Manager	170	30 years or more	56 to 65 years old	1 to 3 years after high school (some college, Associate's degree, or technical school)	Rural	Yes	White, European American, or European		Woman
Confident	Hesitant	Hesitant	Hesitant	Hesitant	Confident	Not Confident	Hesitant	Not Confident	Not Confident	Not Confident	Not Confident	Not Confident	Not Confident	Not Confident	Not Confident	Not Confident	Not Confident	Not Confident	Not Confident	Hesitant	Hesitant	Hesitant
Very Confident	Confident	Not Confident	Not Confident	Confident	Confident	Confident	Not Confident	Hesitant	Confident	Confident	Not Confident	Not Confident	Not Confident	Not Confident	Not Confident	Not Confident	Confident	Confident	Confident	Confident	Confident	Confident	Disagree	Agree	Agree	Agree	Disagree	Disagree	Disagree	Disagree	Disagree	Disagree	Nurse		Other	case management	178	20-29 years	56 to 65 years old	1 to 3 years after high school (some college, Associate's degree, or technical school)	Rural	Yes	White, European American, or European		Woman
Confident	Confident	Hesitant	Hesitant	Hesitant	Confident	Confident	Hesitant	Confident		Confident	Hesitant	Hesitant	Hesitant		Hesitant	Hesitant	Hesitant	Confident	Confident	Confident	Confident	Confident	Disagree	Disagree	Agree	Agree	Disagree	Disagree	Disagree	Disagree	Disagree	Strongly Agree	Nurse		Other	case manager	187	20-29 years	46 to 55 years old	College 4 years or more (college graduate)	Rural	Yes	White, European American, or European		Woman
Confident	Confident	Confident	Hesitant	Confident	Confident	Confident	Confident	Confident	Hesitant	Confident	Hesitant	Hesitant	Hesitant	Hesitant	Hesitant	Hesitant	Hesitant	Confident	Confident	Confident	Confident	Confident	Disagree	Disagree	Disagree	Agree	Agree	Disagree	Disagree	Disagree	Disagree	Agree	Nurse		Other	Endoscopy	178	10-19 years	36 to 45 years old	1 to 3 years after high school (some college, Associate's degree, or technical school)	Rural	Yes	White, European American, or European		Woman
Confident	Hesitant	Not Confident	Not Confident	Not Confident	Hesitant	Hesitant
Confident	Hesitant	Confident	Hesitant	Hesitant	Hesitant	Not Confident	Not Confident	Not Confident	Not Confident	Not Confident	Not Confident	Not Confident	Not Confident	Not Confident	Not Confident	Not Confident	Not Confident	Confident	Not Confident	Not Confident	Not Confident	Hesitant	Strongly Disagree	Strongly Disagree	Agree	Agree	Agree	Disagree	Disagree	Disagree	Strongly Disagree	Strongly Agree	Nurse		Other	oncology		Fewer than 10 years	26 to 35 years old	College 4 years or more (college graduate)	Rural	Yes	White, European American, or European		Woman
Hesitant	Not Confident	Not Confident	Not Confident	Not Confident	Not Confident	Not Confident	Not Confident	Not Confident	Not Confident	Not Confident	Not Confident	Not Confident	Not Confident	Not Confident	Not Confident	Not Confident	Not Confident	Not Confident	Not Confident	Not Confident	Not Confident	Not Confident	Strongly Disagree	Disagree	Agree	Strongly Agree	Strongly Agree	Agree	Strongly Disagree	Strongly Disagree	Strongly Disagree	Strongly Agree	Nurse		Other		187	30 years or more	46 to 55 years old	College 4 years or more (college graduate)	Rural	Yes	White, European American, or European		Woman
Confident	Hesitant	Hesitant	Hesitant	Hesitant	Hesitant	Hesitant	Hesitant	Hesitant	Hesitant	Hesitant	Hesitant	Not Confident	Not Confident	Not Confident	Hesitant	Not Confident	Hesitant	Confident	Confident	Confident	Hesitant	Hesitant	Disagree	Disagree	Agree	Disagree	Agree	Agree	Strongly Disagree	Strongly Disagree	Strongly Disagree	Agree	Nurse		Other		178	30 years or more	56 to 65 years old	College 4 years or more (college graduate)	Rural	Yes	White, European American, or European		Woman
Hesitant	Not Confident	Confident	Confident	Very Confident	Very Confident	Very Confident	Hesitant	Not Confident	Confident	Not Confident	Not Confident	Hesitant	Not Confident	Confident	Confident	Hesitant	Not Confident	Very Confident	Very Confident	Confident	Confident	Confident	Disagree	Strongly Disagree	Disagree	Disagree	Disagree	Disagree	Disagree	Agree	Agree	Agree	Nurse		Emergency		170	Fewer than 10 years	18 to 25 years old	College 4 years or more (college graduate)	Suburban	Yes	White, European American, or European		Woman
Confident	Hesitant	Hesitant	Hesitant	Confident	Hesitant	Hesitant	Hesitant	Hesitant	Not Confident	Hesitant	Not Confident	Not Confident	Not Confident	Not Confident	Not Confident	Not Confident	Hesitant	Hesitant	Not Confident	Hesitant	Hesitant	Hesitant	Disagree	Disagree	Strongly Agree	Strongly Agree	Strongly Agree	Strongly Agree	Strongly Disagree	Strongly Disagree	Strongly Disagree	Agree	Nurse		Other	ICU	178	10-19 years	26 to 35 years old	College 4 years or more (college graduate)	Rural	Yes	White, European American, or European		Woman
Very Confident	Hesitant	Confident	Not Confident	Hesitant	Hesitant	Hesitant	Not Confident	Not Confident	Hesitant	Not Confident	Not Confident	Not Confident	Not Confident	Not Confident	Not Confident	Not Confident	Hesitant	Hesitant	Not Confident	Not Confident	Not Confident	Hesitant	Disagree	Agree	Strongly Agree	Agree	Disagree	Disagree	Disagree	Strongly Disagree	Strongly Disagree	Agree	Physician		Pediatrics		178	Fewer than 10 years	26 to 35 years old	Advanced degree (Master's, Doctorate, etc.)	Rural	Yes	White, European American, or European		Woman
Not Confident	Not Confident	Not Confident	Not Confident	Not Confident	Not Confident	Not Confident	Not Confident	Not Confident	Not Confident	Not Confident	Not Confident	Not Confident	Not Confident	Not Confident	Not Confident	Not Confident	Not Confident	Not Confident	Not Confident	Not Confident	Not Confident	Not Confident	Disagree	Disagree	Agree	Agree	Agree	Agree	Strongly Disagree	Strongly Disagree	Strongly Disagree	Agree	Physician		Other	Dermatology	178	Fewer than 10 years	26 to 35 years old	Advanced degree (Master's, Doctorate, etc.)	Rural	Yes	White, European American, or European		Man
Confident	Hesitant	Hesitant	Hesitant	Hesitant	Confident	Hesitant	Hesitant	Hesitant	Hesitant	Hesitant	Hesitant	Not Confident	Hesitant	Hesitant	Not Confident	Not Confident	Not Confident	Hesitant	Hesitant	Not Confident	Not Confident	Not Confident	Strongly Disagree	Disagree	Agree	Agree	Agree	Agree	Disagree	Strongly Disagree	Strongly Disagree	Strongly Agree	Nurse		Other	Stroke Coordinator GCMC	185	30 years or more	56 to 65 years old	Advanced degree (Master's, Doctorate, etc.)	Suburban	Yes	White, European American, or European		Woman
Confident	Confident	Confident	Hesitant	Confident	Confident	Confident	Hesitant	Hesitant	Hesitant	Hesitant	Not Confident	Not Confident	Not Confident	Not Confident	Not Confident	Not Confident	Hesitant	Very Confident	Hesitant	Hesitant	Hesitant	Hesitant	Disagree	Disagree	Agree	Agree	Agree	Agree	Strongly Disagree	Strongly Disagree	Strongly Disagree	Agree	Nurse		Other	BP 8 hematology, oncology	178	Fewer than 10 years	26 to 35 years old	College 4 years or more (college graduate)	Rural	Yes	White, European American, or European		Woman
Confident	Hesitant	Hesitant	Hesitant	Confident	Confident	Confident	Confident	Hesitant	Hesitant	Hesitant	Hesitant	Hesitant	Hesitant	Hesitant	Hesitant	Confident	Not Confident	Confident	Hesitant	Hesitant	Not Confident	Confident	Disagree	Disagree	Strongly Agree	Strongly Agree	Strongly Agree	Agree	Strongly Disagree	Disagree	Agree	Agree	Nurse		Emergency		178	Fewer than 10 years	18 to 25 years old	College 4 years or more (college graduate)	Rural	Yes	White, European American, or European		Woman
Very Confident	Confident	Hesitant	Hesitant	Confident	Very Confident	Very Confident	Hesitant	Confident	Confident	Confident	Hesitant	Hesitant	Hesitant	Confident	Confident	Confident	Confident	Confident	Confident	Confident	Confident	Confident	Strongly Disagree	Disagree	Strongly Agree	Agree	Agree	Agree	Disagree	Disagree	Disagree	Strongly Agree	Other	Psychologist	Other	Medical education	185	30 years or more	56 to 65 years old	Advanced degree (Master's, Doctorate, etc.)	Rural	Yes	White, European American, or European		Woman
Confident	Hesitant	Confident	Confident	Very Confident	Hesitant	Confident	Hesitant	Hesitant	Confident	Confident	Confident	Confident	Confident	Confident	Confident	Confident	Hesitant	Very Confident	Confident	Confident	Confident	Confident	Disagree	Disagree	Agree	Agree	Strongly Agree	Strongly Agree	Disagree	Strongly Disagree	Strongly Disagree	Agree	Nurse		Other	NICU	187	30 years or more	46 to 55 years old	College 4 years or more (college graduate)	Rural	Yes	White, European American, or European		Woman
Confident	Confident	Hesitant	Hesitant	Confident	Confident	Confident	Hesitant	Hesitant	Confident	Confident	Hesitant	Hesitant	Hesitant	Hesitant	Hesitant	Hesitant	Hesitant	Hesitant	Hesitant	Confident	Confident	Hesitant	Disagree	Disagree	Agree	Agree	Agree	Agree	Disagree	Disagree	Disagree	Agree	Nurse		Other		178		26 to 35 years old	College 4 years or more (college graduate)	Rural	Yes	White, European American, or European		Woman
Not Confident	Not Confident	Not Confident	Not Confident	Not Confident	Not Confident	Not Confident	Not Confident	Not Confident	Not Confident	Not Confident	Not Confident	Not Confident	Not Confident	Not Confident	Not Confident	Not Confident	Not Confident	Not Confident	Not Confident	Not Confident	Not Confident	Not Confident	Disagree	Agree	Agree	Agree	Disagree	Disagree	Disagree	Disagree	Disagree	Agree	Physician		Other	ophthalmology	178	Fewer than 10 years	26 to 35 years old	Advanced degree (Master's, Doctorate, etc.)	Rural	Yes	White, European American, or European		Woman
Confident	Confident	Hesitant	Not Confident	Not Confident	Hesitant	Hesitant	Not Confident	Not Confident	Not Confident	Not Confident	Not Confident	Not Confident	Not Confident	Not Confident	Not Confident	Not Confident	Not Confident	Not Confident	Not Confident	Not Confident	Not Confident	Not Confident	Disagree	Disagree	Strongly Agree	Agree	Strongly Disagree	Strongly Disagree	Disagree	Strongly Disagree	Strongly Disagree	Agree	Physician		Other	Family Medicine	178	Fewer than 10 years	36 to 45 years old	Advanced degree (Master's, Doctorate, etc.)	Rural	Yes	White, European American, or European		Woman
Confident	Confident	Confident	Hesitant	Hesitant	Confident	Confident	Hesitant	Hesitant	Hesitant	Hesitant	Hesitant	Hesitant	Hesitant	Hesitant	Hesitant	Hesitant	Hesitant	Confident	Hesitant	Hesitant	Hesitant	Hesitant	Disagree	Disagree	Agree	Agree	Agree	Disagree	Agree	Disagree	Agree	Agree	Nurse		Other		187	Prefer not to answer.	Prefer not to answer.	1 to 3 years after high school (some college, Associate's degree, or technical school)	Prefer not to answer.	Yes	White, European American, or European		Woman
Confident	Hesitant	Hesitant	Hesitant	Hesitant	Confident	Confident	Hesitant	Hesitant	Hesitant	Hesitant	Hesitant	Hesitant	Hesitant	Hesitant	Hesitant	Hesitant	Hesitant	Hesitant	Hesitant	Hesitant	Hesitant	Hesitant	Disagree	Disagree	Agree	Disagree	Strongly Disagree	Disagree	Strongly Disagree	Strongly Disagree	Strongly Disagree	Agree	Nurse		Other	case management	168	10-19 years	36 to 45 years old	College 4 years or more (college graduate)	Rural	Yes	White, European American, or European		Woman
Confident	Hesitant	Hesitant	Hesitant	Hesitant	Confident	Confident	Not Confident	Hesitant	Hesitant	Confident	Not Confident	Not Confident	Not Confident	Not Confident	Not Confident	Not Confident	Hesitant	Hesitant	Hesitant	Hesitant	Hesitant	Hesitant	Disagree	Disagree	Strongly Agree	Strongly Agree	Strongly Agree	Strongly Agree	Strongly Disagree	Strongly Disagree	Strongly Disagree	Strongly Disagree	Nurse		Other	Float	178	10-19 years	36 to 45 years old	College 4 years or more (college graduate)	Suburban	Yes	White, European American, or European		Woman
Very Confident	Hesitant	Hesitant	Hesitant	Hesitant	Confident	Confident	Hesitant	Hesitant	Hesitant	Hesitant	Hesitant	Hesitant	Not Confident	Not Confident	Not Confident	Not Confident	Not Confident	Confident	Hesitant	Hesitant	Hesitant	Hesitant	Strongly Disagree	Agree	Strongly Agree	Strongly Disagree	Strongly Disagree	Disagree	Strongly Disagree	Strongly Disagree	Strongly Disagree	Strongly Agree	Nurse		Other	eye clinic	178	20-29 years	46 to 55 years old	College 4 years or more (college graduate)	Suburban	Yes	White, European American, or European		Woman
Confident	Confident	Confident	Confident	Confident	Confident	Confident	Hesitant	Hesitant	Not Confident	Not Confident	Not Confident	Not Confident	Not Confident	Not Confident	Not Confident	Not Confident	Not Confident	Not Confident	Not Confident	Not Confident	Not Confident	Confident	Agree	Agree	Agree	Agree	Agree	Agree	Agree	Strongly Disagree	Strongly Disagree	Strongly Agree	Nurse		Other	cardiology	187	30 years or more	46 to 55 years old	College 4 years or more (college graduate)	Suburban	Yes	White, European American, or European		Woman
Confident	Confident	Hesitant	Hesitant	Confident	Confident	Confident	Hesitant	Hesitant	Not Confident	Hesitant	Not Confident	Not Confident	Not Confident	Not Confident	Not Confident	Not Confident	Not Confident	Not Confident	Not Confident	Not Confident	Not Confident	Hesitant	Disagree	Strongly Disagree	Agree	Agree	Agree	Agree	Disagree	Disagree	Strongly Disagree	Agree	Nurse		Other		178	10-19 years	36 to 45 years old	College 4 years or more (college graduate)	Rural	Yes	White, European American, or European		Woman
Very Confident	Very Confident	Confident	Confident	Confident	Very Confident	Very Confident	Confident	Confident	Hesitant	Confident	Not Confident	Not Confident	Not Confident	Not Confident	Not Confident	Not Confident	Hesitant	Confident	Confident	Confident	Confident	Confident	Disagree	Strongly Disagree	Agree	Agree			Disagree	Disagree	Agree	Strongly Agree	Physician		Other		178	20-29 years	56 to 65 years old	Advanced degree (Master's, Doctorate, etc.)	Rural	Yes	White, European American, or European		Woman
Not Confident	Not Confident	Not Confident	Not Confident	Not Confident	Not Confident	Not Confident	Not Confident	Not Confident	Not Confident	Not Confident	Not Confident	Not Confident	Not Confident	Not Confident	Confident	Not Confident	Not Confident	Confident	Confident	Hesitant	Hesitant	Hesitant
Hesitant	Hesitant	Hesitant	Not Confident	Hesitant	Hesitant	Hesitant	Hesitant	Hesitant	Hesitant	Hesitant	Not Confident	Not Confident	Not Confident	Not Confident	Not Confident	Not Confident	Not Confident	Hesitant	Not Confident	Not Confident	Not Confident	Hesitant	Disagree	Disagree	Agree	Agree	Agree	Agree	Disagree	Disagree	Strongly Disagree	Agree	Physician		Other		178	20-29 years	56 to 65 years old	Advanced degree (Master's, Doctorate, etc.)	Rural	Yes	Asian		Woman
Very Confident	Very Confident	Confident	Hesitant	Very Confident	Confident	Confident	Hesitant	Hesitant	Not Confident	Not Confident	Not Confident	Not Confident	Not Confident	Not Confident	Not Confident	Not Confident	Not Confident	Hesitant	Not Confident	Hesitant	Hesitant	Hesitant	Disagree	Strongly Disagree	Agree	Agree	Agree	Agree	Disagree	Strongly Disagree	Strongly Disagree	Strongly Agree	Nurse		Other	REDACTED Ophthalmology	177	30 years or more	56 to 65 years old	1 to 3 years after high school (some college, Associate's degree, or technical school)	Rural	Yes	White, European American, or European		Woman
Confident	Hesitant	Confident	Not Confident	Not Confident	Not Confident	Not Confident	Not Confident	Not Confident	Not Confident	Not Confident	Not Confident	Not Confident	Not Confident	Not Confident	Not Confident	Not Confident	Not Confident	Not Confident	Not Confident	Not Confident	Not Confident	Not Confident	Agree	Agree	Agree	Agree	Agree	Agree	Strongly Disagree	Strongly Disagree	Strongly Disagree	Agree	Nurse		Other		187	20-29 years	46 to 55 years old	College 4 years or more (college graduate)	Suburban	Yes	White, European American, or European		Woman
Hesitant	Hesitant	Not Confident	Hesitant	Hesitant	Hesitant	Confident	Not Confident	Not Confident	Not Confident	Hesitant	Not Confident	Not Confident	Not Confident	Not Confident	Not Confident	Not Confident	Not Confident	Not Confident	Not Confident	Not Confident	Not Confident	Not Confident	Disagree	Agree	Agree	Agree	Agree	Agree	Agree	Strongly Disagree	Strongly Disagree	Strongly Disagree	Physician		Other	hospitalist	178	Fewer than 10 years	36 to 45 years old	Advanced degree (Master's, Doctorate, etc.)	Rural	Yes	White, European American, or European		Woman
Not Confident	Not Confident	Not Confident	Not Confident	Not Confident	Not Confident	Not Confident	Not Confident	Not Confident	Not Confident	Not Confident	Not Confident	Not Confident	Not Confident	Not Confident	Not Confident	Not Confident	Not Confident	Not Confident	Not Confident	Not Confident	Not Confident	Not Confident	Strongly Agree	Strongly Disagree	Strongly Agree	Strongly Agree	Strongly Agree	Strongly Agree	Strongly Disagree	Strongly Disagree	Strongly Disagree	Strongly Agree	Nurse		Other	icu	178	20-29 years	46 to 55 years old	College 4 years or more (college graduate)	Rural	No	Prefer not to answer.		Woman
Confident	Hesitant	Not Confident	Not Confident	Hesitant	Confident	Confident	Hesitant	Not Confident	Not Confident	Not Confident	Not Confident	Not Confident	Not Confident	Not Confident	Not Confident	Not Confident	Not Confident	Not Confident	Not Confident	Not Confident	Not Confident	Hesitant	Disagree	Disagree	Agree	Agree	Disagree	Disagree	Strongly Disagree	Disagree	Strongly Disagree	Agree	Physician		Pediatrics		178	Fewer than 10 years	26 to 35 years old	Advanced degree (Master's, Doctorate, etc.)	Rural	Yes	Prefer not to answer.		Woman
Confident	Confident	Hesitant	Not Confident	Hesitant	Confident	Confident	Not Confident	Not Confident	Not Confident	Not Confident	Not Confident	Not Confident	Not Confident	Not Confident	Not Confident	Not Confident	Not Confident	Hesitant	Not Confident	Not Confident	Not Confident	Not Confident	Strongly Disagree	Disagree	Agree	Agree	Disagree	Agree	Strongly Disagree	Strongly Disagree	Strongly Disagree	Agree	Nurse		Other	cardiac cath lab		20-29 years	56 to 65 years old	College 4 years or more (college graduate)	Suburban	Yes	White, European American, or European		Woman
Very Confident	Hesitant	Hesitant	Hesitant	Not Confident	Hesitant	Hesitant	Hesitant	Hesitant	Hesitant	Hesitant	Not Confident	Not Confident	Not Confident	Not Confident	Not Confident	Not Confident	Not Confident	Not Confident	Not Confident	Not Confident	Not Confident	Not Confident	Disagree	Disagree	Agree	Strongly Agree	Strongly Agree	Strongly Agree	Strongly Disagree	Strongly Disagree	Disagree	Agree	Nurse		Other	Med/Surg	187	Fewer than 10 years	18 to 25 years old	College 4 years or more (college graduate)	Suburban	Yes	White, European American, or European		Woman
Hesitant	Not Confident	Not Confident	Not Confident	Not Confident	Not Confident	Not Confident	Not Confident	Not Confident	Not Confident	Not Confident	Not Confident	Not Confident	Not Confident	Not Confident	Not Confident	Not Confident	Not Confident	Hesitant	Not Confident	Not Confident	Not Confident	Not Confident	Disagree	Disagree	Disagree	Disagree	Agree	Agree	Disagree	Disagree	Disagree	Agree	Nurse		Emergency		170	20-29 years	46 to 55 years old	1 to 3 years after high school (some college, Associate's degree, or technical school)	Rural	Yes	White, European American, or European		Woman
Very Confident	Confident	Confident	Confident	Confident		Confident	Hesitant	Confident	Hesitant	Hesitant	Hesitant	Hesitant	Hesitant	Hesitant	Hesitant	Hesitant	Hesitant	Hesitant	Hesitant	Hesitant	Confident	Confident	Strongly Disagree	Disagree	Strongly Agree	Agree	Agree	Agree	Disagree	Disagree	Disagree	Agree	Nurse		Psychiatry		170	10-19 years	46 to 55 years old	College 4 years or more (college graduate)	Rural	Yes	White, European American, or European		Man
Hesitant	Not Confident	Not Confident	Not Confident	Hesitant	Hesitant	Hesitant	Not Confident	Not Confident	Not Confident	Not Confident	Not Confident	Not Confident	Not Confident	Not Confident	Not Confident	Not Confident	Not Confident	Not Confident	Not Confident	Not Confident	Not Confident	Not Confident	Strongly Disagree	Strongly Disagree	Agree	Disagree	Disagree	Disagree	Strongly Disagree	Strongly Disagree	Strongly Disagree	Agree	Nurse		Other		170	10-19 years	36 to 45 years old	College 4 years or more (college graduate)	Rural	Yes	White, European American, or European		Woman
Very Confident	Confident	Confident	Not Confident	Confident	Not Confident	Confident	Not Confident	Not Confident	Not Confident	Not Confident	Not Confident	Not Confident	Not Confident	Not Confident	Not Confident	Not Confident	Not Confident	Very Confident	Not Confident	Not Confident	Not Confident	Not Confident	Agree	Disagree	Strongly Agree	Agree	Agree	Agree	Strongly Disagree	Strongly Disagree	Strongly Disagree	Strongly Disagree	Physician		Other	Cardiology	187	30 years or more	56 to 65 years old	Advanced degree (Master's, Doctorate, etc.)	Rural	Yes	White, European American, or European		Man
Confident	Confident	Confident	Hesitant	Confident	Very Confident	Very Confident	Confident	Confident	Confident	Confident	Confident	Confident	Hesitant	Confident	Confident	Confident	Hesitant	Very Confident	Confident	Confident	Confident	Confident	Disagree	Disagree	Agree	Disagree	Agree	Agree	Disagree	Disagree	Agree	Agree	Nurse		Other	addictions	184	20-29 years	46 to 55 years old	College 4 years or more (college graduate)	Urban	Yes	White, European American, or European		Woman
Very Confident	Very Confident	Confident	Hesitant	Confident	Confident	Confident	Not Confident	Hesitant	Hesitant	Hesitant	Hesitant	Hesitant	Not Confident	Hesitant	Hesitant	Hesitant	Not Confident	Not Confident	Not Confident	Not Confident	Not Confident	Not Confident	Disagree	Disagree	Agree	Agree	Disagree	Disagree	Agree	Strongly Disagree	Disagree	Disagree	Physician		Other	Family Medicine	187	10-19 years	36 to 45 years old	Advanced degree (Master's, Doctorate, etc.)	Suburban	Yes	White, European American, or European		Woman
Hesitant	Hesitant	Hesitant	Hesitant	Hesitant	Confident	Confident	Hesitant	Hesitant	Hesitant	Hesitant	Hesitant	Hesitant	Hesitant	Hesitant	Hesitant	Hesitant	Hesitant	Hesitant	Hesitant	Hesitant	Hesitant	Hesitant	Disagree	Agree	Agree	Agree	Disagree	Agree	Disagree	Disagree	Disagree	Agree	Nurse		Other			Fewer than 10 years	26 to 35 years old	College 4 years or more (college graduate)	Rural	Yes	White, European American, or European		Woman
Confident	Not Confident	Hesitant	Confident	Confident	Hesitant	Hesitant	Hesitant	Hesitant	Not Confident	Hesitant	Not Confident	Not Confident	Not Confident	Not Confident	Not Confident	Not Confident	Not Confident	Not Confident	Not Confident	Hesitant	Not Confident	Not Confident	Strongly Disagree	Disagree		Disagree	Disagree	Disagree	Disagree	Disagree	Strongly Disagree	Strongly Agree
Confident	Confident	Confident	Hesitant	Confident	Confident	Confident	Confident	Hesitant	Hesitant	Hesitant	Not Confident	Not Confident	Not Confident	Not Confident	Not Confident	Not Confident	Hesitant	Confident	Confident	Confident	Hesitant	Hesitant	Strongly Disagree	Disagree	Agree	Disagree	Agree	Agree	Disagree	Strongly Disagree	Strongly Disagree	Strongly Agree	Nurse		Other	Infusion pharmacy	178	30 years or more	56 to 65 years old	1 to 3 years after high school (some college, Associate's degree, or technical school)	Rural	Yes	White, European American, or European		Woman
Confident	Hesitant	Hesitant	Hesitant	Confident	Confident	Confident	Hesitant	Hesitant	Hesitant	Hesitant	Hesitant	Hesitant	Hesitant	Hesitant	Hesitant	Hesitant	Hesitant	Hesitant	Hesitant	Hesitant	Hesitant	Hesitant	Disagree	Disagree	Agree	Agree	Agree	Agree	Disagree	Strongly Disagree	Strongly Disagree	Agree	Nurse		Other			20-29 years	36 to 45 years old	College 4 years or more (college graduate)	Rural	Yes	White, European American, or European		Woman
Confident	Confident	Very Confident	Confident	Confident	Confident	Confident	Hesitant	Hesitant	Hesitant	Hesitant	Not Confident	Not Confident	Not Confident	Not Confident	Not Confident	Not Confident	Not Confident	Not Confident	Not Confident	Very Confident	Not Confident	Not Confident	Disagree	Strongly Disagree	Strongly Agree	Agree	Agree	Disagree	Disagree	Disagree	Disagree	Agree	Physician		Other		178	10-19 years	46 to 55 years old	Advanced degree (Master's, Doctorate, etc.)	Rural	Yes	White, European American, or European		Woman
Confident	Hesitant	Hesitant	Not Confident	Not Confident	Hesitant	Confident	Not Confident	Not Confident	Not Confident	Not Confident	Not Confident	Not Confident	Not Confident	Not Confident	Not Confident	Not Confident	Not Confident	Confident	Not Confident	Not Confident	Not Confident	Not Confident	Strongly Disagree	Agree	Agree	Disagree	Agree	Agree	Disagree	Strongly Disagree	Strongly Disagree	Agree	Nurse		Prefer not to answer.		170	10-19 years	26 to 35 years old	College 4 years or more (college graduate)	Rural	Yes	White, European American, or European		Woman
Hesitant	Hesitant	Hesitant	Hesitant	Hesitant	Hesitant	Hesitant	Not Confident	Not Confident	Hesitant	Hesitant	Hesitant	Hesitant	Hesitant	Hesitant	Hesitant	Hesitant	Not Confident	Hesitant	Hesitant	Not Confident	Not Confident	Not Confident
Confident	Confident	Confident	Hesitant	Confident	Confident	Confident	Hesitant	Hesitant	Hesitant	Hesitant	Hesitant	Hesitant	Hesitant	Hesitant	Confident	Hesitant	Hesitant	Confident	Hesitant	Hesitant	Hesitant	Hesitant
Confident	Hesitant	Hesitant	Hesitant	Not Confident	Not Confident	Not Confident	Hesitant	Not Confident	Not Confident	Not Confident	Hesitant	Hesitant	Hesitant	Hesitant	Hesitant	Not Confident	Not Confident	Not Confident	Not Confident	Not Confident	Not Confident	Not Confident	Strongly Disagree	Strongly Disagree	Strongly Agree	Agree	Agree	Agree	Strongly Agree	Disagree	Disagree	Strongly Agree	Nurse		Other	cancer	185	20-29 years		1 to 3 years after high school (some college, Associate's degree, or technical school)	Suburban	Yes	White, European American, or European		Woman
Hesitant	Hesitant	Hesitant	Hesitant	Hesitant	Hesitant	Hesitant	Hesitant	Not Confident	Not Confident	Not Confident	Not Confident	Not Confident	Not Confident	Not Confident	Not Confident	Not Confident	Not Confident	Not Confident	Not Confident	Not Confident	Not Confident	Not Confident	Disagree	Disagree	Agree	Agree	Agree	Agree	Disagree	Disagree	Disagree	Strongly Agree	Nurse		Other	Case Management		20-29 years	36 to 45 years old	1 to 3 years after high school (some college, Associate's degree, or technical school)	Suburban	Yes	White, European American, or European		Woman
Confident	Confident	Hesitant	Not Confident	Not Confident	Confident	Confident	Hesitant	Hesitant	Hesitant	Hesitant	Not Confident	Not Confident	Not Confident	Not Confident	Not Confident	Not Confident	Not Confident	Hesitant	Hesitant	Hesitant	Hesitant	Hesitant	Disagree	Disagree	Agree	Agree	Disagree	Agree	Disagree	Strongly Disagree	Strongly Disagree	Strongly Disagree	Nurse		Other	Oncology clinic	179	10-19 years	26 to 35 years old	1 to 3 years after high school (some college, Associate's degree, or technical school)	Rural	Yes	White, European American, or European		Woman
Hesitant	Hesitant	Hesitant	Not Confident	Not Confident	Not Confident	Not Confident	Not Confident	Not Confident	Not Confident	Not Confident	Not Confident	Not Confident	Not Confident	Not Confident	Not Confident	Not Confident	Not Confident	Not Confident	Not Confident	Not Confident	Not Confident	Not Confident	Disagree		Agree	Agree	Agree	Agree	Strongly Disagree	Strongly Disagree	Strongly Disagree	Strongly Agree	Nurse		Other	General Surgery Clinic	178		26 to 35 years old	College 4 years or more (college graduate)	Rural	Yes	White, European American, or European		Woman
Hesitant	Hesitant	Hesitant	Hesitant	Hesitant	Hesitant	Hesitant	Hesitant	Hesitant	Hesitant	Hesitant	Not Confident	Not Confident	Not Confident	Not Confident	Not Confident	Not Confident	Hesitant	Hesitant	Not Confident	Not Confident	Not Confident	Hesitant	Disagree	Agree	Agree	Agree			Disagree	Strongly Disagree	Strongly Disagree	Agree	Nurse			Invasive Cardiology	170	30 years or more	46 to 55 years old	1 to 3 years after high school (some college, Associate's degree, or technical school)	Suburban	Yes	White, European American, or European		Woman
Confident	Confident	Hesitant	Not Confident	Hesitant	Hesitant	Hesitant	Hesitant	Hesitant	Not Confident	Not Confident	Not Confident	Not Confident	Not Confident	Not Confident	Not Confident	Not Confident	Not Confident	Hesitant	Not Confident	Hesitant	Hesitant	Not Confident	Strongly Disagree	Disagree	Agree				Strongly Disagree	Strongly Disagree	Strongly Disagree	Agree	Nurse		Other	Research	.	10-19 years	36 to 45 years old	College 4 years or more (college graduate)	Rural	Yes	White, European American, or European		Woman
Hesitant	Hesitant	Not Confident	Not Confident	Hesitant	Confident	Confident	Hesitant	Not Confident	Hesitant	Hesitant	Hesitant	Hesitant	Hesitant	Hesitant	Hesitant	Hesitant	Hesitant	Hesitant	Hesitant	Confident	Confident	Hesitant	Agree	Agree	Agree	Disagree	Agree	Agree	Disagree	Disagree	Disagree	Agree	Nurse			Case Manager Cardiology	187	10-19 years	46 to 55 years old	1 to 3 years after high school (some college, Associate's degree, or technical school)	Rural	Yes	White, European American, or European		Man
Confident	Confident	Confident	Hesitant	Hesitant	Confident	Confident	Hesitant	Hesitant	Confident	Confident	Confident	Confident	Confident	Confident	Confident	Confident	Hesitant	Confident	Hesitant	Confident	Confident	Confident	Disagree	Disagree	Strongly Agree	Disagree	Disagree	Disagree	Disagree	Strongly Disagree	Disagree	Disagree	Nurse		Other	OR	187	Fewer than 10 years	26 to 35 years old	College 4 years or more (college graduate)	Rural	Yes	White, European American, or European		Woman
Confident	Confident	Confident	Hesitant	Hesitant	Hesitant	Hesitant	Not Confident	Not Confident	Not Confident	Not Confident	Not Confident	Not Confident	Not Confident	Not Confident		Not Confident	Not Confident	Hesitant	Not Confident	Not Confident	Not Confident	Not Confident	Disagree	Disagree	Agree	Disagree	Agree	Agree	Disagree	Strongly Disagree	Strongly Disagree	Agree	Nurse		OB/GYN		.	30 years or more	56 to 65 years old	1 to 3 years after high school (some college, Associate's degree, or technical school)	Rural	Yes	White, European American, or European		Woman
Hesitant	Hesitant	Hesitant	Not Confident	Not Confident	Hesitant	Hesitant	Not Confident	Not Confident	Not Confident	Hesitant	Not Confident	Not Confident	Not Confident	Not Confident	Not Confident	Hesitant	Not Confident	Not Confident	Not Confident	Not Confident	Not Confident	Not Confident	Disagree	Strongly Disagree	Disagree	Agree	Agree	Agree	Strongly Disagree	Strongly Disagree	Strongly Disagree	Agree	Nurse		Other	fam prac	179	Fewer than 10 years	26 to 35 years old	College 4 years or more (college graduate)	Rural	Yes	White, European American, or European		Woman
Confident	Not Confident	Not Confident	Not Confident	Not Confident	Confident	Confident	Not Confident	Not Confident	Not Confident	Not Confident	Not Confident	Not Confident	Not Confident	Not Confident	Not Confident	Hesitant	Hesitant	Confident	Not Confident	Not Confident	Confident	Hesitant	Disagree	Agree	Agree	Agree	Agree	Agree	Disagree	Disagree	Disagree	Strongly Agree	Nurse		Psychiatry		170	20-29 years	46 to 55 years old	College 4 years or more (college graduate)	Suburban	Yes	White, European American, or European		Woman
Confident	Confident	Not Confident	Not Confident	Hesitant	Hesitant	Hesitant	Not Confident	Not Confident	Hesitant	Hesitant	Not Confident	Not Confident	Not Confident	Not Confident	Not Confident	Not Confident	Not Confident	Confident	Confident	Not Confident	Hesitant	Hesitant	Disagree	Strongly Disagree	Strongly Disagree	Strongly Agree	Strongly Agree	Agree	Strongly Disagree	Disagree	Strongly Disagree	Strongly Agree	Nurse			Cardiac	187	Fewer than 10 years	26 to 35 years old	College 4 years or more (college graduate)	Rural	Yes	White, European American, or European		Woman
Hesitant	Not Confident	Not Confident	Not Confident	Not Confident	Not Confident	Not Confident	Not Confident	Not Confident	Not Confident	Not Confident	Not Confident	Not Confident	Not Confident	Not Confident	Not Confident	Not Confident	Not Confident	Not Confident	Not Confident	Not Confident	Not Confident	Not Confident	Disagree	Agree	Agree	Disagree	Disagree	Agree	Disagree	Disagree	Disagree	Disagree	Nurse		Other		170	30 years or more	46 to 55 years old	1 to 3 years after high school (some college, Associate's degree, or technical school)	Suburban	Yes	White, European American, or European		Woman
Hesitant	Hesitant	Hesitant	Hesitant	Hesitant	Hesitant	Hesitant	Not Confident	Not Confident	Not Confident	Not Confident	Hesitant	Hesitant	Not Confident	Not Confident	Hesitant			Confident	Hesitant	Hesitant	Hesitant	Hesitant	Agree	Disagree	Agree	Agree	Strongly Disagree	Strongly Disagree	Strongly Disagree	Strongly Disagree	Strongly Disagree	Disagree	Nurse		Other		187	30 years or more	46 to 55 years old	College 4 years or more (college graduate)	Rural	Yes	Prefer not to answer.		Woman
Hesitant	Not Confident	Not Confident	Not Confident	Not Confident	Hesitant	Hesitant	Not Confident	Not Confident	Not Confident	Not Confident	Confident	Confident	Not Confident	Not Confident	Confident	Confident	Not Confident	Not Confident	Hesitant	Not Confident	Not Confident	Not Confident	Strongly Disagree	Disagree	Agree	Disagree	Agree	Agree	Strongly Disagree	Disagree	Strongly Disagree	Strongly Agree	Nurse		Other	Home Health	178	Fewer than 10 years	36 to 45 years old	1 to 3 years after high school (some college, Associate's degree, or technical school)	Rural	Yes	Prefer not to answer.		Woman
Confident	Hesitant	Hesitant	Hesitant	Hesitant	Confident	Confident	Confident	Hesitant	Hesitant	Confident	Not Confident	Not Confident	Not Confident	Not Confident	Not Confident	Hesitant	Hesitant	Hesitant	Not Confident	Not Confident	Not Confident	Hesitant	Disagree	Disagree	Agree	Disagree	Disagree	Disagree	Agree	Disagree	Disagree	Agree	Physician		OB/GYN			20-29 years	56 to 65 years old	Advanced degree (Master's, Doctorate, etc.)	Rural	Yes
Confident	Confident	Not Confident	Not Confident	Confident	Confident	Confident	Not Confident	Hesitant	Hesitant	Hesitant	Hesitant	Not Confident	Not Confident	Not Confident	Not Confident	Not Confident	Not Confident	Not Confident	Not Confident	Not Confident	Not Confident	Not Confident	Strongly Disagree	Disagree	Disagree	Agree	Agree	Agree	Disagree	Strongly Disagree	Strongly Disagree	Strongly Agree	Nurse	Case Manager	Other	Care Management	178	30 years or more	56 to 65 years old	1 to 3 years after high school (some college, Associate's degree, or technical school)	Rural	Yes	White, European American, or European		Woman
Confident	Confident	Hesitant	Hesitant	Hesitant	Confident	Confident	Hesitant	Hesitant	Confident	Confident	Not Confident	Hesitant	Hesitant	Not Confident	Not Confident	Not Confident	Not Confident	Confident	Hesitant	Not Confident	Not Confident	Hesitant
Confident	Hesitant	Hesitant	Hesitant	Hesitant	Very Confident	Very Confident	Confident	Confident	Hesitant	Hesitant	Hesitant	Hesitant	Hesitant	Hesitant	Not Confident	Not Confident	Hesitant	Hesitant	Hesitant	Confident	Confident	Confident	Disagree	Agree	Agree	Agree	Agree	Agree	Agree	Agree	Agree	Agree	Nurse		Other	PACU	178	Fewer than 10 years	18 to 25 years old	College 4 years or more (college graduate)	Rural	Yes	White, European American, or European		Woman
Not Confident	Not Confident	Hesitant	Hesitant	Hesitant	Not Confident	Hesitant	Not Confident	Not Confident	Not Confident	Not Confident	Not Confident	Not Confident	Not Confident	Not Confident	Not Confident	Hesitant	Not Confident	Hesitant	Not Confident	Hesitant	Hesitant	Hesitant	Disagree	Disagree	Strongly Agree	Agree	Agree	Disagree	Strongly Disagree	Strongly Disagree	Strongly Disagree	Agree	Nurse		Prefer not to answer.		178	10-19 years	26 to 35 years old	Advanced degree (Master's, Doctorate, etc.)	Rural	Yes	White, European American, or European		Woman
Confident	Hesitant	Not Confident	Hesitant	Not Confident	Not Confident	Not Confident	Not Confident	Not Confident	Not Confident	Not Confident	Not Confident	Not Confident	Not Confident	Not Confident	Not Confident	Not Confident	Not Confident	Hesitant	Not Confident	Not Confident	Not Confident	Not Confident	Disagree	Agree	Agree	Agree	Agree	Agree	Strongly Disagree	Strongly Disagree	Strongly Disagree	Agree	Nurse		Other	ortho/med-surg	185	30 years or more	56 to 65 years old	1 to 3 years after high school (some college, Associate's degree, or technical school)	Suburban	Yes	White, European American, or European		Woman
Confident	Confident	Hesitant	Not Confident	Hesitant	Confident	Confident	Confident	Hesitant	Confident	Confident	Hesitant	Hesitant	Not Confident	Hesitant	Hesitant	Hesitant	Hesitant	Confident	Confident	Confident	Hesitant	Confident	Disagree	Agree	Agree	Agree	Disagree	Strongly Agree	Disagree	Strongly Disagree	Disagree	Agree	Nurse		Other	Medical/Surgical	170	Fewer than 10 years	18 to 25 years old	College 4 years or more (college graduate)	Rural	Yes	White, European American, or European		Man
Confident	Hesitant	Hesitant	Hesitant	Confident	Confident	Confident	Hesitant	Confident	Hesitant	Confident	Not Confident	Not Confident	Not Confident	Not Confident	Not Confident	Not Confident	Not Confident	Hesitant	Hesitant	Hesitant	Hesitant	Hesitant	Disagree	Disagree	Agree	Disagree	Disagree	Disagree	Strongly Disagree	Strongly Disagree	Strongly Disagree	Strongly Agree	Nurse		Other		.	10-19 years	36 to 45 years old	Advanced degree (Master's, Doctorate, etc.)	Rural	Yes	White, European American, or European		Woman
Confident	Hesitant	Hesitant	Not Confident	Hesitant	Very Confident	Very Confident	Confident	Confident	Very Confident	Confident	Hesitant	Hesitant	Hesitant	Hesitant	Hesitant	Hesitant	Confident	Confident	Confident	Confident	Confident	Confident
Not Confident	Not Confident	Not Confident	Not Confident	Not Confident	Confident	Confident	Not Confident	Not Confident	Not Confident	Not Confident	Not Confident	Not Confident	Not Confident	Not Confident	Not Confident	Not Confident	Not Confident	Not Confident	Not Confident	Not Confident	Not Confident	Not Confident	Strongly Disagree	Disagree	Agree	Agree	Agree	Agree	Strongly Disagree	Strongly Disagree	Strongly Disagree	Agree	Nurse		OB/GYN		178	10-19 years	26 to 35 years old	College 4 years or more (college graduate)	Rural	Yes	White, European American, or European		Woman
Confident	Confident	Confident	Hesitant	Confident	Hesitant	Hesitant	Hesitant	Hesitant	Hesitant	Hesitant	Hesitant	Hesitant	Not Confident	Hesitant	Hesitant	Not Confident	Not Confident	Not Confident	Not Confident	Not Confident	Not Confident	Not Confident	Strongly Disagree	Strongly Disagree	Strongly Disagree	Agree	Agree	Agree	Strongly Disagree	Strongly Disagree	Strongly Disagree	Strongly Agree	Nurse		Psychiatry		178	20-29 years	46 to 55 years old	College 4 years or more (college graduate)	Rural	Yes	White, European American, or European		Man
Not Confident	Not Confident	Not Confident	Not Confident	Hesitant	Hesitant	Hesitant	Not Confident	Not Confident	Not Confident	Not Confident	Not Confident	Not Confident	Not Confident	Not Confident	Not Confident	Not Confident	Not Confident	Hesitant	Not Confident	Not Confident	Not Confident	Not Confident	Disagree	Disagree	Strongly Agree	Strongly Agree	Agree	Disagree	Strongly Disagree	Strongly Disagree	Strongly Disagree	Disagree	Nurse		Pediatrics		178	30 years or more	56 to 65 years old	1 to 3 years after high school (some college, Associate's degree, or technical school)	Prefer not to answer.	Yes	White, European American, or European		Woman
Very Confident	Very Confident	Not Confident	Not Confident	Very Confident	Very Confident	Very Confident	Confident	Hesitant	Hesitant	Hesitant	Not Confident	Not Confident	Not Confident	Not Confident	Not Confident	Not Confident	Not Confident	Confident	Confident	Hesitant	Hesitant	Confident
Not Confident	Not Confident	Not Confident	Not Confident	Not Confident	Not Confident	Not Confident	Not Confident	Not Confident	Not Confident	Not Confident	Not Confident	Not Confident	Not Confident	Not Confident	Not Confident	Not Confident	Not Confident	Not Confident	Not Confident	Not Confident	Not Confident		Disagree	Disagree	Agree	Agree	Agree	Agree	Strongly Disagree	Strongly Disagree	Strongly Disagree	Strongly Disagree	Physician		Other	Community Medicine	186	10-19 years	36 to 45 years old	Advanced degree (Master's, Doctorate, etc.)	Rural	Yes	White, European American, or European		Man
Confident	Confident	Confident	Hesitant	Hesitant	Confident	Confident	Hesitant	Hesitant	Hesitant	Hesitant	Hesitant	Hesitant	Hesitant	Hesitant	Confident	Hesitant	Confident	Confident	Confident	Hesitant	Confident	Confident	Disagree	Disagree	Agree	Agree	Agree	Agree	Disagree	Disagree	Disagree	Agree	Nurse		Other		178	Fewer than 10 years	36 to 45 years old	College 4 years or more (college graduate)	Suburban	Yes	White, European American, or European		Woman
Confident	Confident	Confident	Very Confident	Very Confident	Very Confident	Very Confident	Very Confident	Hesitant	Hesitant	Hesitant	Hesitant	Hesitant	Hesitant	Hesitant	Hesitant	Not Confident	Not Confident	Very Confident	Confident	Not Confident	Not Confident	Confident	Disagree	Strongly Disagree	Agree	Agree	Agree	Agree	Strongly Disagree	Disagree	Strongly Disagree	Agree	Nurse		Other	NICU	178	Fewer than 10 years	18 to 25 years old	College 4 years or more (college graduate)	Rural	Yes	White, European American, or European		Woman
Confident	Hesitant	Not Confident	Hesitant	Hesitant	Confident	Confident	Not Confident	Not Confident	Not Confident	Not Confident	Not Confident	Not Confident	Not Confident	Not Confident	Not Confident	Not Confident	Not Confident	Hesitant	Not Confident	Not Confident	Not Confident	Hesitant	Disagree	Disagree	Agree	Agree	Agree	Agree	Disagree	Strongly Disagree	Strongly Disagree	Agree	Nurse		Pediatrics		178	Fewer than 10 years	18 to 25 years old	College 4 years or more (college graduate)	Rural	Yes	White, European American, or European		Woman
Confident	Hesitant	Confident	Not Confident	Hesitant	Confident	Confident	Not Confident	Not Confident	Hesitant	Confident	Not Confident	Not Confident	Not Confident	Not Confident	Not Confident	Not Confident	Not Confident	Hesitant	Not Confident	Hesitant	Hesitant	Hesitant	Disagree	Disagree	Agree	Agree	Agree	Agree	Disagree	Strongly Disagree	Strongly Disagree	Agree	Nurse		Other	progressive care unit	185	Fewer than 10 years	18 to 25 years old	College 4 years or more (college graduate)	Suburban	Yes	White, European American, or European		Woman
Hesitant	Not Confident	Not Confident	Not Confident	Not Confident	Not Confident	Not Confident	Not Confident	Not Confident	Not Confident	Not Confident	Not Confident	Not Confident	Not Confident	Not Confident	Not Confident	Not Confident	Not Confident	Not Confident	Not Confident	Not Confident	Not Confident	Not Confident
Confident	Confident	Hesitant	Not Confident	Not Confident	Hesitant	Confident	Confident	Hesitant	Hesitant	Hesitant	Not Confident	Hesitant	Not Confident	Not Confident	Hesitant	Hesitant	Hesitant	Confident	Hesitant	Hesitant	Hesitant	Hesitant	Strongly Disagree	Disagree	Strongly Agree	Agree	Agree	Agree	Agree	Strongly Disagree	Strongly Disagree	Agree	Nurse		Other	ortho	185	Fewer than 10 years	26 to 35 years old	College 4 years or more (college graduate)	Rural	Yes	White, European American, or European		Woman
Hesitant	Hesitant	Not Confident	Not Confident	Not Confident	Hesitant	Hesitant	Not Confident	Not Confident	Not Confident	Not Confident	Very Confident	Confident	Not Confident	Not Confident	Very Confident	Confident	Not Confident	Not Confident	Not Confident	Not Confident	Not Confident	Not Confident	Strongly Disagree	Disagree	Strongly Agree	Strongly Agree	Agree	Agree	Strongly Disagree	Strongly Disagree	Strongly Disagree	Agree	Physician			Family Medicine (there are WAY more of us than the above listed options	168	10-19 years	36 to 45 years old	Advanced degree (Master's, Doctorate, etc.)	Rural	Yes	White, European American, or European		Man
Confident	Hesitant	Confident	Not Confident	Confident	Hesitant	Very Confident	Hesitant	Hesitant	Not Confident	Not Confident	Not Confident	Not Confident	Not Confident	Not Confident	Not Confident	Not Confident	Not Confident	Not Confident	Not Confident	Not Confident	Not Confident	Not Confident	Agree	Agree	Agree	Agree	Agree	Agree	Disagree	Disagree	Disagree	Agree	Nurse		Other	medical-surgical	187	Fewer than 10 years	26 to 35 years old	College 4 years or more (college graduate)	Suburban	Yes	White, European American, or European		Woman
Confident	Confident	Not Confident	Confident	Confident	Confident	Confident	Not Confident	Not Confident	Confident	Confident	Not Confident	Not Confident	Not Confident	Not Confident	Not Confident	Not Confident	Not Confident	Hesitant	Confident	Confident	Hesitant	Confident	Strongly Disagree	Disagree	Agree	Agree	Agree	Agree	Disagree	Disagree	Disagree	Agree	Nurse		Pediatrics		185	Fewer than 10 years	18 to 25 years old	College 4 years or more (college graduate)	Rural	Yes	White, European American, or European		Woman
Confident	Confident	Not Confident	Not Confident	Not Confident	Not Confident	Hesitant	Not Confident	Not Confident	Not Confident	Not Confident	Not Confident	Not Confident	Not Confident	Not Confident	Not Confident	Not Confident	Not Confident	Confident	Not Confident	Not Confident	Hesitant	Not Confident	Disagree	Disagree	Agree	Disagree	Agree	Agree	Strongly Disagree	Strongly Disagree	Strongly Disagree	Agree	Nurse		Other	same day surgery	178	30 years or more	56 to 65 years old	College 4 years or more (college graduate)	Rural	Yes	White, European American, or European		Woman
Hesitant	Not Confident	Not Confident	Not Confident	Not Confident	Not Confident	Hesitant	Not Confident	Not Confident	Not Confident	Not Confident	Not Confident	Not Confident	Not Confident	Not Confident	Not Confident	Not Confident	Not Confident	Not Confident	Not Confident	Not Confident	Not Confident	Not Confident	Disagree	Agree	Agree	Agree	Disagree	Disagree	Strongly Disagree	Strongly Disagree	Strongly Disagree	Strongly Agree	Nurse			pacu	178	10-19 years	46 to 55 years old	1 to 3 years after high school (some college, Associate's degree, or technical school)	Suburban	Yes	White, European American, or European		Woman
Confident	Confident	Hesitant	Confident	Confident	Confident	Confident	Hesitant	Hesitant	Confident	Hesitant	Hesitant	Hesitant	Hesitant	Hesitant	Confident	Hesitant	Hesitant	Confident	Hesitant	Hesitant	Confident	Hesitant	Disagree	Disagree	Disagree	Agree	Agree	Disagree	Agree	Disagree	Disagree	Agree	Nurse		Emergency		187	30 years or more	56 to 65 years old	1 to 3 years after high school (some college, Associate's degree, or technical school)	Urban	Yes	White, European American, or European		Woman
Very Confident	Very Confident	Confident	Not Confident	Hesitant	Confident		Confident	Confident	Hesitant	Confident	Not Confident	Not Confident	Not Confident	Not Confident	Not Confident	Not Confident	Not Confident	Very Confident	Very Confident	Very Confident	Very Confident	Very Confident	Disagree	Disagree	Agree	Agree	Agree	Agree	Strongly Disagree	Strongly Disagree	Agree	Agree	Nurse		Other	Med-Surg		Fewer than 10 years	18 to 25 years old	College 4 years or more (college graduate)	Rural	Yes	Hispanic, Latino, or Spanish		Woman
Very Confident	Confident	Hesitant	Confident	Hesitant	Hesitant	Hesitant	Hesitant	Confident	Hesitant	Confident	Hesitant	Hesitant	Hesitant	Hesitant	Hesitant	Hesitant	Hesitant	Hesitant	Hesitant	Hesitant	Hesitant	Hesitant	Disagree	Agree	Agree	Disagree	Disagree	Disagree	Strongly Disagree	Disagree	Strongly Disagree	Strongly Disagree	Nurse		Emergency		170	Fewer than 10 years	26 to 35 years old	College 4 years or more (college graduate)	Rural	Yes	White, European American, or European		Woman
Hesitant	Not Confident	Not Confident	Not Confident	Not Confident	Not Confident	Not Confident	Not Confident	Hesitant	Not Confident	Not Confident	Not Confident	Not Confident	Not Confident	Not Confident	Not Confident	Not Confident	Hesitant	Hesitant	Not Confident	Not Confident	Not Confident	Not Confident	Disagree	Disagree	Strongly Agree	Agree			Disagree	Strongly Disagree	Disagree	Strongly Agree	Nurse		Other	patient education in clinic setting	187	30 years or more	56 to 65 years old	College 4 years or more (college graduate)	Suburban	Yes	White, European American, or European		Woman
Confident	Hesitant	Hesitant	Hesitant	Hesitant	Confident	Confident	Hesitant	Hesitant	Not Confident	Confident	Hesitant	Confident	Hesitant	Hesitant	Hesitant	Hesitant	Hesitant	Confident	Not Confident	Confident	Confident	Confident	Disagree	Disagree	Disagree	Agree	Agree	Agree	Strongly Disagree	Strongly Disagree	Strongly Disagree	Agree	Nurse		Other		178	Fewer than 10 years	18 to 25 years old	1 to 3 years after high school (some college, Associate's degree, or technical school)	Rural	Yes	White, European American, or European		Woman
Confident	Not Confident	Hesitant	Hesitant	Very Confident	Confident	Confident	Hesitant	Hesitant	Hesitant	Hesitant	Not Confident	Not Confident	Not Confident	Not Confident	Not Confident	Not Confident	Not Confident	Not Confident	Not Confident	Hesitant	Hesitant	Confident	Disagree	Disagree	Strongly Agree	Agree	Agree	Agree	Disagree	Strongly Disagree	Strongly Disagree	Agree	Nurse		Other	IMCU/ Telemetry	170	Fewer than 10 years	26 to 35 years old	College 4 years or more (college graduate)	Rural	Yes	White, European American, or European		Woman
Very Confident	Confident	Confident	Confident	Confident	Confident	Confident	Confident	Confident	Hesitant	Hesitant	Hesitant	Hesitant	Hesitant	Hesitant	Hesitant	Hesitant	Hesitant	Confident	Confident	Hesitant	Hesitant	Confident	Strongly Disagree	Strongly Disagree	Agree	Strongly Agree	Agree	Agree	Disagree	Agree	Disagree	Strongly Agree	Nurse		Other	Telemetry	170	10-19 years	26 to 35 years old	College 4 years or more (college graduate)	Suburban	Yes	Hispanic, Latino, or Spanish		Woman
Confident	Confident	Hesitant	Hesitant	Hesitant	Confident	Confident	Hesitant	Hesitant	Hesitant	Confident	Hesitant	Hesitant	Hesitant	Hesitant	Hesitant	Hesitant	Hesitant	Confident	Hesitant	Hesitant	Hesitant	Hesitant	Disagree	Disagree	Agree	Agree	Agree	Agree	Strongly Disagree	Disagree	Disagree	Agree	Nurse		Other	SCU	178	20-29 years	56 to 65 years old	College 4 years or more (college graduate)	Rural	Yes	White, European American, or European		Woman
Not Confident	Not Confident	Not Confident	Not Confident	Hesitant	Confident	Confident	Not Confident	Not Confident	Not Confident	Not Confident	Not Confident	Not Confident	Not Confident	Not Confident	Not Confident	Not Confident	Not Confident	Confident	Not Confident	Hesitant	Hesitant	Not Confident	Strongly Disagree	Agree	Agree	Agree	Agree	Agree	Strongly Disagree	Strongly Disagree	Strongly Disagree	Strongly Agree	Nurse		Other	Med surg	187	Fewer than 10 years	26 to 35 years old	College 4 years or more (college graduate)	Urban	Yes	Asian		Woman
Hesitant	Hesitant	Not Confident	Not Confident	Hesitant	Hesitant	Confident	Not Confident	Not Confident	Not Confident	Not Confident	Not Confident	Not Confident	Not Confident	Not Confident	Not Confident	Not Confident	Not Confident	Hesitant	Hesitant	Not Confident	Hesitant	Hesitant	Disagree	Agree	Agree	Agree	Agree	Agree	Strongly Disagree	Strongly Disagree	Strongly Disagree	Agree	Nurse		Other	surgical	170	Fewer than 10 years	26 to 35 years old	College 4 years or more (college graduate)	Rural	No	White, European American, or European		Woman
Hesitant	Not Confident	Hesitant	Not Confident	Not Confident	Not Confident	Not Confident	Not Confident	Not Confident	Not Confident	Hesitant	Not Confident	Not Confident	Not Confident	Not Confident	Not Confident	Not Confident	Not Confident	Confident	Not Confident	Not Confident	Not Confident	Hesitant	Disagree	Disagree	Disagree	Agree	Agree	Agree	Disagree	Strongly Disagree	Strongly Disagree	Strongly Agree	Nurse		Emergency		178	30 years or more	56 to 65 years old	1 to 3 years after high school (some college, Associate's degree, or technical school)	Rural	Yes	White, European American, or European		Woman
Confident	Hesitant	Hesitant	Not Confident	Hesitant	Hesitant	Hesitant	Not Confident	Not Confident	Not Confident	Not Confident	Not Confident	Not Confident	Not Confident	Not Confident	Not Confident	Not Confident	Not Confident	Not Confident	Not Confident	Not Confident	Not Confident	Not Confident	Disagree	Disagree	Agree	Agree	Agree	Agree	Strongly Disagree	Strongly Disagree	Strongly Disagree	Strongly Disagree	Physician		Other	Dermatology	168	Fewer than 10 years	36 to 45 years old	Advanced degree (Master's, Doctorate, etc.)	Rural	Yes	White, European American, or European		Woman
Very Confident	Hesitant	Confident	Hesitant	Hesitant	Very Confident	Very Confident	Hesitant	Not Confident	Not Confident	Not Confident	Not Confident	Not Confident	Not Confident	Not Confident	Not Confident	Not Confident	Not Confident	Not Confident	Not Confident	Not Confident	Not Confident	Very Confident	Strongly Disagree	Strongly Disagree	Agree	Strongly Agree	Strongly Agree	Strongly Agree	Strongly Disagree	Strongly Disagree	Strongly Disagree	Strongly Agree	Nurse		Other	Progressive Care Unit	187	Fewer than 10 years	18 to 25 years old	1 to 3 years after high school (some college, Associate's degree, or technical school)	Urban	Yes	White, European American, or European		Woman
Confident	Confident	Not Confident	Not Confident	Not Confident	Not Confident	Not Confident	Not Confident	Not Confident	Not Confident	Not Confident	Not Confident	Not Confident	Not Confident	Not Confident	Not Confident	Not Confident	Not Confident	Not Confident	Not Confident	Not Confident	Not Confident	Not Confident	Disagree	Disagree	Agree	Disagree	Agree	Disagree	Disagree	Strongly Disagree	Strongly Disagree	Strongly Agree	Nurse			home health	178	30 years or more	56 to 65 years old	College 4 years or more (college graduate)	Rural	Yes	White, European American, or European		Woman
Hesitant	Not Confident	Not Confident	Not Confident	Not Confident	Hesitant	Hesitant	Not Confident	Not Confident	Not Confident	Hesitant	Not Confident	Not Confident	Not Confident	Not Confident	Not Confident	Not Confident	Not Confident	Hesitant	Not Confident	Not Confident	Hesitant	Not Confident	Strongly Disagree	Strongly Disagree	Strongly Agree	Agree	Disagree	Disagree	Strongly Disagree	Strongly Disagree	Strongly Disagree	Strongly Agree	Nurse		OB/GYN		187	Fewer than 10 years	36 to 45 years old	College 4 years or more (college graduate)	Rural	Yes	White, European American, or European		Woman
Confident	Hesitant	Confident	Not Confident	Hesitant	Confident	Confident	Not Confident	Hesitant	Hesitant	Confident	Not Confident	Not Confident	Not Confident	Not Confident	Not Confident	Not Confident	Not Confident	Not Confident	Not Confident	Hesitant	Hesitant	Confident	Strongly Disagree	Strongly Disagree	Strongly Agree	Disagree	Agree	Agree	Strongly Disagree	Strongly Disagree	Strongly Disagree	Strongly Agree	Nurse		Pediatrics		178	Fewer than 10 years	18 to 25 years old	College 4 years or more (college graduate)	Rural	Yes	White, European American, or European		Woman
Confident	Hesitant	Confident	Confident	Hesitant	Confident	Confident	Hesitant	Hesitant	Confident	Confident	Hesitant	Hesitant	Hesitant	Hesitant	Hesitant	Hesitant	Confident	Confident	Confident	Hesitant	Hesitant	Hesitant	Disagree	Disagree	Agree	Agree	Agree	Agree	Strongly Disagree	Disagree	Disagree	Agree	Nurse		Pediatrics		178	30 years or more	56 to 65 years old	1 to 3 years after high school (some college, Associate's degree, or technical school)	Rural	Yes	None of these fully describe me.		Woman
Very Confident	Very Confident	Not Confident	Not Confident	Confident	Confident	Very Confident	Very Confident	Very Confident	Very Confident	Very Confident	Hesitant	Hesitant	Hesitant	Hesitant	Hesitant	Hesitant	Hesitant	Very Confident	Very Confident	Very Confident	Very Confident	Very Confident	Disagree	Agree	Strongly Agree	Strongly Agree	Strongly Agree	Disagree	Disagree	Disagree	Agree	Agree	Nurse		Psychiatry		.	20-29 years	36 to 45 years old	College 4 years or more (college graduate)	Suburban	Yes	White, European American, or European		Woman
Hesitant	Hesitant	Hesitant	Hesitant	Hesitant	Hesitant	Hesitant	Hesitant	Hesitant	Hesitant	Hesitant	Hesitant	Hesitant	Hesitant	Hesitant	Hesitant	Hesitant	Hesitant	Hesitant	Hesitant	Hesitant	Hesitant	Hesitant	Agree	Agree	Agree	Agree	Agree	Agree	Disagree	Disagree	Disagree	Strongly Agree	Nurse		Emergency		185	20-29 years	46 to 55 years old	College 4 years or more (college graduate)	Urban	Yes	White, European American, or European		Man
Confident	Hesitant	Hesitant	Hesitant	Confident	Confident	Confident	Hesitant	Hesitant	Not Confident	Hesitant	Not Confident	Not Confident	Not Confident	Not Confident	Hesitant	Not Confident	Hesitant	Confident	Not Confident	Hesitant	Confident	Confident	Disagree	Disagree	Agree	Agree	Strongly Agree	Strongly Agree	Disagree	Strongly Disagree	Strongly Disagree	Agree	Nurse		Other	ICU	170	10-19 years	36 to 45 years old	1 to 3 years after high school (some college, Associate's degree, or technical school)	Rural	Yes	White, European American, or European		Woman
Confident	Hesitant	Hesitant	Hesitant	Hesitant	Hesitant	Hesitant	Hesitant	Hesitant	Hesitant	Hesitant	Hesitant	Hesitant	Hesitant	Hesitant	Hesitant	Hesitant	Hesitant	Confident	Hesitant	Hesitant	Hesitant	Hesitant	Disagree	Disagree	Agree	Disagree	Agree	Agree	Disagree	Disagree	Disagree	Agree	Nurse		Other	icu	170	Fewer than 10 years	18 to 25 years old	College 4 years or more (college graduate)	Rural	Yes	White, European American, or European		Woman
Hesitant	Hesitant	Confident	Not Confident	Not Confident	Not Confident	Confident	Not Confident	Not Confident	Not Confident	Not Confident	Not Confident	Not Confident	Not Confident	Not Confident	Not Confident	Not Confident	Not Confident	Not Confident	Not Confident	Not Confident	Not Confident	Not Confident	Agree	Strongly Disagree	Strongly Agree	Disagree	Agree	Agree	Disagree	Strongly Disagree	Strongly Disagree	Agree	Nurse		Other	NICU	187	Fewer than 10 years	26 to 35 years old	1 to 3 years after high school (some college, Associate's degree, or technical school)	Suburban	Yes	White, European American, or European		Woman
Confident	Hesitant	Confident	Confident	Confident	Confident	Confident	Hesitant	Hesitant	Confident	Confident	Confident	Hesitant	Hesitant	Hesitant	Confident	Confident	Hesitant	Confident	Hesitant	Hesitant	Hesitant	Hesitant	Disagree	Disagree	Agree	Disagree	Disagree	Disagree	Disagree	Disagree	Disagree	Agree	Nurse		Other		178	10-19 years	36 to 45 years old	College 4 years or more (college graduate)	Rural	Yes	White, European American, or European		Woman
Confident	Hesitant	Hesitant	Not Confident	Hesitant	Confident	Hesitant	Not Confident	Not Confident	Hesitant	Hesitant	Not Confident	Not Confident	Not Confident	Not Confident	Not Confident	Not Confident	Not Confident	Not Confident	Not Confident	Not Confident	Not Confident	Hesitant	Disagree	Disagree	Agree	Agree	Disagree	Disagree	Strongly Disagree	Strongly Disagree	Strongly Disagree	Agree	Nurse		Other	Telemetry	170	Fewer than 10 years	18 to 25 years old	College 4 years or more (college graduate)	Rural	Yes	White, European American, or European		Woman
Very Confident	Confident	Confident	Hesitant	Confident	Confident	Confident	Hesitant	Hesitant	Confident	Hesitant	Hesitant	Confident	Hesitant	Confident	Confident	Hesitant	Confident	Very Confident	Confident	Confident	Confident	Confident	Strongly Disagree	Disagree	Strongly Agree	Disagree	Agree	Agree	Disagree	Strongly Disagree	Disagree	Agree	Nurse		Psychiatry		170	Fewer than 10 years	18 to 25 years old	College 4 years or more (college graduate)	Rural	Yes	White, European American, or European		Woman
Very Confident	Very Confident	Very Confident	Confident	Confident	Very Confident	Very Confident	Hesitant	Hesitant	Hesitant	Confident	Not Confident	Not Confident	Not Confident	Not Confident	Not Confident	Not Confident	Not Confident	Confident	Confident	Confident	Confident	Hesitant	Strongly Disagree	Strongly Disagree	Agree	Agree	Disagree	Disagree	Strongly Disagree	Strongly Disagree	Strongly Disagree	Strongly Agree	Nurse		Other	Med Surg	187	Fewer than 10 years	18 to 25 years old	College 4 years or more (college graduate)	Suburban	Yes	White, European American, or European		Woman
Confident	Hesitant	Hesitant	Hesitant	Confident	Hesitant	Confident	Hesitant	Hesitant	Hesitant	Hesitant	Hesitant	Hesitant	Hesitant	Hesitant	Hesitant	Hesitant	Hesitant	Hesitant	Hesitant	Hesitant	Hesitant	Hesitant	Disagree	Disagree	Agree	Agree	Disagree	Disagree	Disagree	Disagree	Disagree	Disagree	Nurse		Other			Fewer than 10 years	26 to 35 years old	College 4 years or more (college graduate)	Rural	Yes	White, European American, or European		Woman
Very Confident	Very Confident	Hesitant	Not Confident	Confident	Very Confident	Very Confident	Hesitant	Hesitant	Hesitant	Confident	Not Confident	Not Confident	Not Confident	Not Confident	Not Confident	Not Confident	Hesitant	Confident	Hesitant	Not Confident	Hesitant	Very Confident	Strongly Disagree	Strongly Disagree	Strongly Agree	Strongly Agree	Disagree	Disagree	Strongly Disagree	Strongly Disagree	Strongly Disagree	Strongly Agree	Nurse		Other	Long term care	185	Fewer than 10 years	26 to 35 years old	College 4 years or more (college graduate)	Urban	No	Black, African American, or African		Woman
Confident	Hesitant	Hesitant	Not Confident	Not Confident	Hesitant	Hesitant	Not Confident	Not Confident	Not Confident	Not Confident	Not Confident	Not Confident	Not Confident	Not Confident	Not Confident	Not Confident	Not Confident	Hesitant	Not Confident	Hesitant	Hesitant	Not Confident	Disagree	Agree	Agree	Agree	Agree	Disagree	Strongly Disagree	Strongly Disagree	Strongly Disagree	Agree	Nurse		Psychiatry		178	Fewer than 10 years	46 to 55 years old	College 4 years or more (college graduate)	Rural	Yes	White, European American, or European		Woman
Not Confident	Not Confident	Not Confident	Not Confident	Not Confident	Not Confident	Not Confident	Not Confident	Not Confident	Not Confident	Not Confident	Not Confident	Not Confident	Not Confident	Not Confident	Not Confident	Not Confident	Not Confident	Not Confident	Not Confident	Not Confident	Not Confident	Not Confident	Disagree	Disagree	Agree	Disagree	Disagree	Disagree	Strongly Disagree	Strongly Disagree	Strongly Disagree	Agree	Nurse		Other		178	30 years or more	Prefer not to answer.	College 4 years or more (college graduate)	Rural	Yes	White, European American, or European		Woman
Confident	Hesitant	Hesitant	Not Confident	Hesitant	Confident	Confident	Hesitant	Not Confident	Not Confident	Not Confident	Not Confident	Not Confident	Not Confident	Not Confident	Not Confident	Not Confident	Not Confident	Not Confident	Not Confident	Not Confident	Not Confident	Hesitant	Strongly Disagree	Disagree	Agree	Agree	Agree	Agree	Disagree	Disagree	Disagree	Agree	Nurse		Emergency		185	Fewer than 10 years	18 to 25 years old	College 4 years or more (college graduate)	Suburban	Yes	White, European American, or European		Woman
Confident	Confident	Hesitant	Hesitant	Confident	Confident	Confident	Hesitant	Hesitant	Hesitant	Hesitant	Hesitant	Hesitant	Hesitant	Hesitant	Confident	Hesitant	Hesitant	Confident	Confident	Hesitant	Hesitant	Confident	Disagree	Agree	Agree	Agree	Agree	Agree	Disagree	Agree	Agree	Disagree	Nurse		Other		178	10-19 years	36 to 45 years old	College 4 years or more (college graduate)	Rural	Yes	White, European American, or European		Woman
Confident	Hesitant	Hesitant	Not Confident	Not Confident	Confident	Confident	Hesitant	Not Confident	Hesitant	Confident	Not Confident	Hesitant	Not Confident	Not Confident	Not Confident	Not Confident	Not Confident	Very Confident	Not Confident	Not Confident	Very Confident	Hesitant	Strongly Disagree	Agree	Agree	Agree	Agree	Agree	Strongly Disagree	Strongly Disagree	Strongly Disagree	Strongly Agree	Nurse			ICU	184	Fewer than 10 years	18 to 25 years old	College 4 years or more (college graduate)	Suburban	Yes	White, European American, or European		Woman
Very Confident	Confident	Confident	Very Confident	Confident	Confident	Confident	Hesitant	Hesitant	Not Confident	Very Confident	Not Confident	Not Confident	Not Confident	Not Confident	Not Confident	Not Confident	Not Confident	Not Confident	Hesitant	Hesitant	Confident	Confident	Disagree	Strongly Disagree	Agree	Disagree	Disagree	Disagree	Strongly Disagree	Strongly Disagree	Strongly Agree	Strongly Agree	Nurse		Emergency		.	20-29 years	46 to 55 years old	College 4 years or more (college graduate)	Rural	Yes	White, European American, or European		Woman
Hesitant	Not Confident	Not Confident	Not Confident	Not Confident	Not Confident	Not Confident	Not Confident	Not Confident	Not Confident	Not Confident	Not Confident	Not Confident	Not Confident	Not Confident	Not Confident	Not Confident	Not Confident	Not Confident	Not Confident	Not Confident	Not Confident	Not Confident	Disagree	Agree	Strongly Agree	Agree	Agree	Agree	Strongly Disagree	Strongly Disagree	Strongly Disagree	Agree	Nurse		Other	Kealth Services	186	30 years or more	56 to 65 years old	1 to 3 years after high school (some college, Associate's degree, or technical school)	Rural	Yes	White, European American, or European		Woman
Confident	Hesitant	Hesitant	Not Confident	Not Confident	Hesitant	Confident	Not Confident	Not Confident	Not Confident	Not Confident	Not Confident	Not Confident	Not Confident	Not Confident	Not Confident	Not Confident	Not Confident	Not Confident	Not Confident	Not Confident	Not Confident	Not Confident	Strongly Disagree	Disagree	Agree	Agree	Disagree	Disagree	Disagree	Strongly Disagree	Strongly Disagree	Agree	Nurse		Other		178	20-29 years	46 to 55 years old	College 4 years or more (college graduate)	Rural	Yes	White, European American, or European		Woman
Confident		Hesitant		Not Confident	Confident	Confident	Not Confident	Not Confident	Not Confident	Not Confident	Not Confident	Not Confident	Not Confident	Not Confident	Not Confident	Not Confident	Not Confident	Confident	Not Confident	Not Confident	Not Confident	Not Confident	Strongly Disagree	Disagree	Agree	Agree	Agree	Agree	Strongly Disagree	Strongly Disagree	Strongly Disagree	Strongly Agree	Other	RN Case Manager	Other	REDACTED	178	30 years or more	46 to 55 years old	College 4 years or more (college graduate)	Rural	Yes	White, European American, or European		Woman
Very Confident	Confident	Confident	Hesitant	Confident	Very Confident	Very Confident	Hesitant	Hesitant	Confident	Confident	Hesitant	Hesitant	Hesitant	Hesitant	Hesitant	Hesitant	Confident	Very Confident	Hesitant	Confident	Confident	Hesitant	Disagree	Agree	Agree	Agree	Agree	Agree	Disagree	Disagree	Disagree	Disagree	Nurse		Other		187	20-29 years	56 to 65 years old	College 4 years or more (college graduate)	Suburban	Yes	White, European American, or European		Man
Not Confident	Not Confident	Not Confident	Not Confident	Not Confident	Not Confident	Not Confident	Not Confident	Not Confident	Not Confident	Not Confident	Not Confident	Not Confident	Not Confident	Not Confident	Not Confident	Not Confident	Not Confident	Not Confident	Not Confident	Not Confident	Not Confident	Not Confident	Disagree	Disagree	Disagree	Disagree	Disagree	Disagree	Disagree	Disagree	Disagree	Agree	Nurse		Emergency		185	Fewer than 10 years	18 to 25 years old	College 4 years or more (college graduate)	Urban	Yes	White, European American, or European		Woman
Very Confident	Confident	Not Confident	Confident	Confident	Confident	Hesitant		Not Confident	Not Confident	Not Confident	Not Confident	Not Confident	Not Confident	Not Confident	Not Confident	Not Confident	Not Confident	Confident	Not Confident	Hesitant	Not Confident	Hesitant	Strongly Disagree	Strongly Disagree	Agree	Strongly Disagree	Agree	Agree	Strongly Disagree	Strongly Disagree	Strongly Disagree	Strongly Agree	Nurse		Other	Urology	178	Fewer than 10 years	36 to 45 years old	College 4 years or more (college graduate)	Suburban	Yes	White, European American, or European		Woman
Hesitant	Hesitant	Hesitant	Not Confident	Confident	Confident	Confident	Hesitant	Hesitant	Hesitant	Hesitant	Not Confident	Not Confident	Not Confident	Not Confident	Not Confident	Not Confident	Hesitant	Confident	Hesitant	Hesitant	Hesitant	Confident	Disagree	Disagree	Agree	Agree	Disagree	Disagree	Disagree	Disagree	Disagree	Agree	Nurse		Other	critical care	178	Fewer than 10 years	26 to 35 years old	Advanced degree (Master's, Doctorate, etc.)	Rural	Yes	White, European American, or European		Woman
Confident	Confident	Not Confident	Hesitant	Confident	Confident	Confident	Hesitant	Hesitant	Hesitant	Hesitant	Not Confident	Not Confident	Not Confident	Not Confident	Not Confident	Not Confident	Not Confident	Hesitant	Not Confident	Not Confident	Hesitant	Hesitant	Strongly Disagree	Agree	Agree	Agree	Agree	Agree	Disagree	Strongly Disagree	Agree	Agree	Nurse		Pediatrics		.	10-19 years	36 to 45 years old	College 4 years or more (college graduate)	Rural	Yes	White, European American, or European		Man
Confident	Hesitant	Not Confident	Not Confident	Hesitant	Confident	Confident	Not Confident	Not Confident	Hesitant	Confident	Not Confident	Not Confident	Not Confident	Not Confident	Not Confident	Not Confident	Confident	Confident	Confident	Confident	Not Confident	Not Confident	Disagree	Agree	Agree	Agree	Disagree	Disagree	Strongly Disagree	Strongly Disagree	Strongly Disagree	Strongly Disagree	Nurse		Other	Med/Surg	178	Fewer than 10 years	46 to 55 years old	College 4 years or more (college graduate)	Suburban	Yes	White, European American, or European		Woman
Confident	Confident	Not Confident	Hesitant	Hesitant	Hesitant	Confident	Hesitant	Hesitant	Hesitant	Hesitant	Hesitant	Hesitant	Hesitant	Not Confident	Confident	Hesitant	Hesitant	Confident	Confident	Not Confident	Hesitant	Hesitant
Confident	Confident	Hesitant	Hesitant	Confident	Confident	Confident	Hesitant	Hesitant	Hesitant	Hesitant	Not Confident	Not Confident	Not Confident	Not Confident	Not Confident	Not Confident	Hesitant	Confident	Hesitant	Confident	Confident	Confident	Disagree	Agree	Agree	Agree	Agree	Agree	Disagree	Disagree	Disagree	Agree	Nurse		Other	OR	170	10-19 years	26 to 35 years old	1 to 3 years after high school (some college, Associate's degree, or technical school)	Rural	Yes	White, European American, or European		Man
Confident	Confident	Confident	Confident	Confident	Confident	Confident	Hesitant	Hesitant	Confident	Confident	Hesitant	Hesitant	Hesitant	Hesitant	Confident	Confident	Hesitant	Confident	Confident	Confident	Confident	Confident											Nurse		Other		185	20-29 years	46 to 55 years old	College 4 years or more (college graduate)	Rural	Yes	White, European American, or European		Woman
Very Confident	Confident	Confident	Confident	Confident	Confident	Confident	Confident	Hesitant	Not Confident	Not Confident	Not Confident	Not Confident	Not Confident	Not Confident	Not Confident	Not Confident	Not Confident	Not Confident	Not Confident	Not Confident	Not Confident	Not Confident	Strongly Disagree	Strongly Disagree	Strongly Agree	Strongly Agree	Agree	Agree	Strongly Disagree	Strongly Disagree	Disagree	Agree	Nurse		Other	NICU	170	30 years or more	56 to 65 years old	Advanced degree (Master's, Doctorate, etc.)	Suburban	No	White, European American, or European		Woman
Hesitant	Hesitant	Not Confident	Not Confident	Not Confident	Not Confident	Not Confident	Not Confident	Not Confident	Not Confident	Not Confident	Hesitant	Hesitant	Not Confident	Hesitant	Hesitant	Hesitant	Not Confident	Very Confident	Hesitant	Hesitant	Hesitant	Hesitant	Strongly Disagree	Agree	Agree	Agree	Disagree	Disagree	Strongly Disagree	Strongly Disagree	Strongly Disagree	Agree	Nurse		Other		170	30 years or more	46 to 55 years old	College 4 years or more (college graduate)	Rural	Yes	White, European American, or European		Woman
Confident	Hesitant	Not Confident	Not Confident	Not Confident	Not Confident	Not Confident	Not Confident	Not Confident	Not Confident	Not Confident	Not Confident	Not Confident	Not Confident	Not Confident	Not Confident	Not Confident	Not Confident	Hesitant	Not Confident	Not Confident	Not Confident	Not Confident	Disagree	Disagree	Agree	Agree	Agree	Agree	Strongly Disagree	Disagree	Strongly Disagree	Agree	Nurse		Other	PACU/ same day surgery	178	20-29 years	46 to 55 years old	College 4 years or more (college graduate)	Rural	Yes	White, European American, or European		Woman
Confident	Hesitant	Hesitant	Not Confident	Confident	Confident	Confident	Not Confident	Not Confident	Not Confident	Not Confident	Not Confident	Not Confident	Not Confident	Not Confident	Not Confident	Not Confident	Not Confident	Very Confident	Hesitant	Not Confident	Not Confident	Not Confident	Disagree	Disagree	Agree	Agree	Agree	Agree	Strongly Disagree	Disagree	Disagree	Agree	Nurse		Other	telemetry	185	Fewer than 10 years	18 to 25 years old	College 4 years or more (college graduate)	Suburban	Yes	White, European American, or European		Woman
Hesitant	Hesitant	Not Confident	Not Confident	Not Confident	Not Confident	Hesitant	Not Confident	Not Confident	Not Confident	Not Confident	Not Confident	Not Confident	Not Confident	Not Confident	Not Confident	Not Confident	Not Confident	Not Confident	Not Confident	Not Confident	Not Confident	Not Confident	Disagree	Agree	Agree	Disagree	Disagree	Disagree	Disagree	Strongly Disagree	Strongly Disagree	Agree	Physician		Other		178	20-29 years	46 to 55 years old	Advanced degree (Master's, Doctorate, etc.)	Rural	Yes	White, European American, or European		Man
Confident	Confident	Confident	Hesitant	Confident	Confident	Confident	Hesitant	Hesitant	Hesitant	Hesitant	Hesitant	Hesitant	Hesitant	Hesitant	Hesitant	Hesitant	Hesitant	Hesitant	Hesitant	Hesitant	Hesitant	Hesitant	Disagree	Disagree	Agree		Agree		Disagree	Disagree	Disagree	Agree	Nurse		Other	pain clinic	178	30 years or more	56 to 65 years old	College 4 years or more (college graduate)	Rural	Yes	White, European American, or European		Woman
Very Confident	Confident	Hesitant	Hesitant	Very Confident	Confident	Confident				Hesitant	Hesitant	Hesitant	Hesitant	Hesitant	Hesitant	Hesitant	Hesitant	Hesitant	Hesitant	Hesitant	Hesitant	Confident	Agree	Agree	Agree	Agree	Disagree	Disagree	Disagree	Strongly Disagree	Strongly Disagree	Agree
Hesitant	Hesitant	Hesitant	Not Confident	Hesitant	Confident	Confident	Hesitant	Hesitant	Hesitant	Not Confident	Not Confident	Not Confident	Not Confident	Not Confident	Not Confident	Not Confident	Not Confident	Not Confident	Not Confident	Hesitant	Hesitant	Hesitant
Confident	Confident	Hesitant	Hesitant	Hesitant	Hesitant	Confident	Hesitant	Not Confident		Confident	Not Confident	Not Confident	Hesitant	Not Confident	Not Confident	Not Confident	Hesitant	Very Confident	Hesitant	Hesitant	Hesitant	Hesitant	Strongly Disagree	Strongly Disagree	Strongly Agree	Disagree	Disagree	Disagree	Strongly Disagree	Strongly Disagree	Strongly Disagree	Strongly Agree	Nurse		Other	Med/Surg	187	10-19 years	26 to 35 years old	College 4 years or more (college graduate)	Suburban	Yes	Prefer not to answer.		Woman
Confident	Confident	Confident	Not Confident	Confident	Hesitant	Hesitant	Hesitant	Not Confident	Not Confident	Not Confident	Not Confident	Not Confident	Not Confident	Not Confident	Not Confident	Not Confident	Hesitant	Confident	Hesitant	Not Confident	Not Confident	Hesitant
Confident	Confident	Confident	Hesitant	Confident	Hesitant	Hesitant	Hesitant	Not Confident	Not Confident	Not Confident	Not Confident	Not Confident	Not Confident	Not Confident	Not Confident	Not Confident	Confident	Confident	Hesitant	Hesitant	Hesitant	Hesitant	Strongly Disagree	Disagree	Strongly Agree	Agree	Agree	Agree	Disagree	Strongly Disagree	Strongly Disagree	Strongly Agree	Physician		Other	Oral and Maxillofacial Surgery	178	10-19 years	26 to 35 years old	Advanced degree (Master's, Doctorate, etc.)	Rural	Yes	Asian		Man
Hesitant	Hesitant	Hesitant	Hesitant	Confident	Confident	Confident	Not Confident	Not Confident	Hesitant	Hesitant	Not Confident	Not Confident	Not Confident	Not Confident	Not Confident	Not Confident	Not Confident	Not Confident	Not Confident	Not Confident	Not Confident	Not Confident	Disagree	Disagree	Disagree	Agree	Agree	Agree	Disagree	Disagree	Disagree	Disagree	Nurse		Prefer not to answer.		186	10-19 years	46 to 55 years old	1 to 3 years after high school (some college, Associate's degree, or technical school)	Rural	Yes	White, European American, or European		Woman
Confident	Confident	Not Confident	Not Confident	Not Confident	Confident	Confident	Hesitant	Hesitant	Confident	Confident	Not Confident	Not Confident	Not Confident	Not Confident	Not Confident	Confident	Hesitant	Confident	Confident	Hesitant	Hesitant	Hesitant	Disagree	Disagree	Agree	Agree	Agree	Agree	Strongly Disagree	Disagree	Agree	Strongly Agree	Nurse		Emergency		178	10-19 years	46 to 55 years old	College 4 years or more (college graduate)	Rural	Yes	White, European American, or European		Woman
Hesitant	Confident	Not Confident	Not Confident	Hesitant	Confident	Confident	Hesitant	Hesitant	Hesitant	Confident	Confident	Not Confident	Not Confident	Not Confident	Not Confident	Confident	Not Confident	Not Confident	Not Confident	Not Confident	Not Confident	Hesitant	Disagree	Agree	Strongly Agree	Agree	Agree	Agree	Disagree	Strongly Disagree	Strongly Disagree	Agree	Physician		Pediatrics		168	Fewer than 10 years	26 to 35 years old	Advanced degree (Master's, Doctorate, etc.)	Suburban	Yes	Asian		Woman
Hesitant	Hesitant	Hesitant	Not Confident	Not Confident	Hesitant	Hesitant	Not Confident	Not Confident	Not Confident	Not Confident	Not Confident	Not Confident	Not Confident	Not Confident	Not Confident	Not Confident	Not Confident	Not Confident	Not Confident	Not Confident	Not Confident	Not Confident	Strongly Disagree	Strongly Disagree	Agree	Agree	Disagree	Agree	Strongly Disagree	Disagree	Strongly Disagree	Strongly Agree	Nurse		Other	Trauma	185	30 years or more	46 to 55 years old	1 to 3 years after high school (some college, Associate's degree, or technical school)	Suburban	Yes	White, European American, or European		Woman
Confident	Confident	Confident	Confident	Confident	Confident	Confident	Confident	Hesitant	Hesitant	Hesitant	Hesitant	Hesitant	Hesitant	Hesitant	Hesitant	Hesitant	Confident	Confident	Hesitant	Hesitant	Hesitant	Confident	Disagree	Disagree	Agree	Agree	Agree	Agree	Disagree	Strongly Disagree	Strongly Disagree	Agree	Nurse		Prefer not to answer.		178	Prefer not to answer.	Prefer not to answer.	Prefer not to answer.	Rural	Yes	Prefer not to answer.		Prefer not to answer.
Hesitant	Not Confident	Not Confident	Not Confident	Not Confident	Not Confident	Not Confident	Not Confident	Not Confident	Not Confident	Not Confident	Not Confident	Not Confident	Not Confident	Not Confident	Not Confident	Not Confident	Not Confident	Not Confident	Not Confident	Not Confident	Not Confident	Not Confident	Disagree	Disagree	Agree	Disagree	Disagree	Disagree	Disagree	Disagree	Disagree	Agree	Nurse		Other			10-19 years	46 to 55 years old	College 4 years or more (college graduate)	Suburban	Yes	White, European American, or European		Woman
Confident	Confident	Confident	Hesitant	Confident	Hesitant	Hesitant	Hesitant	Hesitant	Hesitant	Hesitant	Not Confident	Not Confident	Not Confident	Not Confident	Not Confident	Not Confident	Not Confident	Hesitant	Hesitant	Hesitant	Hesitant	Hesitant	Disagree	Disagree	Agree	Agree	Agree	Agree	Disagree	Disagree	Disagree	Agree	Nurse		Other	OR	170	30 years or more	56 to 65 years old	1 to 3 years after high school (some college, Associate's degree, or technical school)	Suburban	Yes	White, European American, or European		Woman
Not Confident	Not Confident	Not Confident	Not Confident	Not Confident	Hesitant	Hesitant	Not Confident	Not Confident	Not Confident	Not Confident	Not Confident	Not Confident	Not Confident	Not Confident	Not Confident	Not Confident	Not Confident	Not Confident	Hesitant	Not Confident	Not Confident	Not Confident	Disagree	Disagree	Agree	Agree	Disagree	Disagree	Strongly Disagree	Strongly Disagree	Disagree	Agree	Nurse		Other	Icu	178	Fewer than 10 years	26 to 35 years old	College 4 years or more (college graduate)	Suburban	Yes	White, European American, or European		Woman
Confident	Confident	Hesitant	Hesitant	Confident	Confident	Confident	Not Confident	Not Confident	Not Confident	Hesitant	Not Confident	Not Confident	Not Confident	Not Confident	Not Confident	Not Confident	Not Confident	Confident	Not Confident	Not Confident	Not Confident	Hesitant	Strongly Disagree	Strongly Disagree	Agree				Strongly Disagree	Disagree	Strongly Disagree	Strongly Agree	Nurse		Other	OR	178	Fewer than 10 years	46 to 55 years old		Rural	Yes	White, European American, or European		Woman
Hesitant	Not Confident	Not Confident	Not Confident	Not Confident	Confident	Hesitant	Not Confident	Not Confident	Not Confident	Not Confident	Not Confident	Not Confident	Not Confident	Not Confident	Not Confident	Not Confident	Not Confident	Hesitant	Not Confident	Not Confident	Not Confident	Not Confident	Disagree	Strongly Agree	Strongly Agree	Agree	Disagree	Agree	Strongly Disagree	Strongly Disagree	Strongly Disagree	Agree	Physician		OB/GYN		177	30 years or more	56 to 65 years old	Advanced degree (Master's, Doctorate, etc.)	Rural	No	White, European American, or European		Man
Confident	Confident	Confident	Hesitant	Confident	Confident	Confident	Confident	Hesitant	Hesitant	Confident	Hesitant	Hesitant	Hesitant	Hesitant	Confident	Hesitant	Hesitant	Confident	Hesitant	Hesitant	Hesitant	Confident	Disagree	Disagree	Agree	Strongly Disagree	Agree	Disagree	Disagree	Disagree	Disagree	Agree	Nurse		Psychiatry		178	30 years or more	56 to 65 years old	Advanced degree (Master's, Doctorate, etc.)	Rural	Yes	White, European American, or European		Woman
Hesitant	Hesitant	Hesitant	Confident	Hesitant	Confident	Confident	Hesitant	Hesitant	Hesitant	Hesitant	Hesitant	Hesitant	Hesitant	Hesitant	Hesitant	Hesitant	Hesitant	Hesitant	Hesitant	Hesitant	Hesitant	Hesitant	Disagree	Disagree	Agree	Agree	Agree	Agree	Strongly Disagree	Strongly Disagree	Strongly Disagree	Agree
Confident	Not Confident	Not Confident	Not Confident	Hesitant	Hesitant	Hesitant	Hesitant	Not Confident	Not Confident	Not Confident	Not Confident	Not Confident	Not Confident	Not Confident	Not Confident	Not Confident	Not Confident	Not Confident	Not Confident	Not Confident	Not Confident	Hesitant	Disagree	Disagree	Agree	Agree	Agree	Agree	Strongly Disagree	Strongly Disagree	Agree		Nurse		Other	gastroenterology	170	10-19 years	36 to 45 years old	College 4 years or more (college graduate)	Rural	Yes	White, European American, or European		Woman
Confident	Confident	Confident	Hesitant	Hesitant	Confident	Confident	Confident	Not Confident	Not Confident	Not Confident	Not Confident	Not Confident	Not Confident	Not Confident	Not Confident	Not Confident	Hesitant	Confident	Hesitant	Hesitant	Confident	Hesitant	Disagree	Strongly Disagree	Strongly Agree	Agree	Agree	Agree	Disagree	Strongly Disagree	Disagree	Strongly Agree
Very Confident	Very Confident	Confident	Confident	Very Confident	Confident	Confident	Hesitant	Hesitant	Hesitant	Hesitant	Hesitant	Hesitant	Hesitant	Hesitant	Hesitant	Hesitant	Hesitant	Hesitant	Hesitant	Very Confident	Confident	Hesitant
Hesitant	Hesitant	Hesitant	Hesitant	Hesitant	Hesitant	Hesitant	Hesitant	Hesitant	Hesitant	Hesitant	Hesitant	Hesitant	Hesitant	Hesitant	Hesitant	Hesitant	Hesitant	Hesitant	Hesitant	Confident	Hesitant	Hesitant	Disagree	Disagree	Disagree	Disagree	Disagree	Disagree	Disagree	Disagree	Disagree	Disagree	Nurse		Emergency		178	Fewer than 10 years	26 to 35 years old	College 4 years or more (college graduate)	Suburban	Yes	White, European American, or European		Man
Confident	Confident	Hesitant	Hesitant	Confident	Hesitant	Hesitant	Hesitant	Hesitant	Not Confident	Hesitant	Not Confident	Not Confident	Not Confident	Not Confident	Not Confident	Not Confident	Not Confident	Hesitant	Not Confident	Not Confident	Not Confident	Hesitant	Disagree	Disagree	Agree	Agree	Agree	Disagree	Disagree	Disagree	Agree	Agree	Physician		Pediatrics		178	10-19 years	56 to 65 years old	Advanced degree (Master's, Doctorate, etc.)	Rural	Yes	White, European American, or European		Man
Confident	Confident	Hesitant	Hesitant	Hesitant	Hesitant	Hesitant	Hesitant	Hesitant	Hesitant	Hesitant	Not Confident	Not Confident	Not Confident	Not Confident	Not Confident	Not Confident	Not Confident	Not Confident	Not Confident	Not Confident	Not Confident	Not Confident	Strongly Disagree	Strongly Disagree	Disagree	Agree	Agree	Agree	Strongly Disagree	Strongly Disagree	Strongly Disagree	Strongly Agree	Nurse		OB/GYN		178	Fewer than 10 years	26 to 35 years old	1 to 3 years after high school (some college, Associate's degree, or technical school)	Rural	Yes	White, European American, or European		Woman
Confident	Hesitant	Confident	Very Confident	Very Confident	Very Confident	Very Confident	Hesitant	Hesitant	Hesitant	Hesitant	Not Confident	Not Confident	Not Confident	Not Confident	Not Confident	Not Confident	Hesitant	Very Confident	Confident	Not Confident	Not Confident	Hesitant	Disagree	Strongly Disagree	Disagree	Agree	Agree	Agree	Disagree	Strongly Disagree	Disagree	Agree	Nurse		Other		179	10-19 years	26 to 35 years old	College 4 years or more (college graduate)	Rural	Yes	Prefer not to answer.		Woman
Confident	Confident	Confident	Hesitant	Hesitant	Hesitant	Confident	Hesitant	Hesitant	Hesitant	Hesitant	Confident	Confident	Hesitant	Hesitant	Hesitant	Confident	Hesitant	Confident	Hesitant	Confident	Confident	Hesitant	Disagree	Disagree	Agree	Disagree	Agree	Disagree	Disagree	Disagree	Agree	Strongly Agree	Nurse		Emergency		177	30 years or more	56 to 65 years old	College 4 years or more (college graduate)	Rural	Yes	White, European American, or European		Man
Hesitant	Not Confident	Not Confident	Not Confident	Not Confident	Not Confident	Not Confident	Not Confident	Not Confident	Not Confident	Not Confident	Not Confident	Not Confident	Not Confident	Not Confident	Not Confident	Not Confident	Not Confident	Not Confident	Not Confident	Not Confident	Not Confident	Not Confident	Agree	Agree	Agree	Agree	Agree	Agree	Strongly Disagree	Strongly Disagree	Strongly Disagree	Strongly Agree	Nurse		Emergency		178	20-29 years	36 to 45 years old	College 4 years or more (college graduate)	Rural	Yes	White, European American, or European		Man
Confident	Confident	Confident	Hesitant	Confident	Confident	Confident	Hesitant	Hesitant	Hesitant	Confident	Confident	Hesitant	Hesitant	Hesitant	Hesitant	Hesitant	Confident	Confident	Hesitant	Hesitant	Hesitant	Hesitant
Very Confident	Very Confident	Confident	Hesitant	Confident	Very Confident	Very Confident	Hesitant	Hesitant	Hesitant	Confident	Confident	Hesitant	Hesitant	Hesitant	Not Confident	Hesitant	Confident	Confident	Hesitant	Confident	Hesitant	Confident	Disagree	Disagree	Agree	Disagree	Agree	Agree	Disagree	Agree	Agree	Strongly Agree	Nurse		Emergency		170	20-29 years	36 to 45 years old	College 4 years or more (college graduate)	Suburban	Yes	White, European American, or European		Woman
Hesitant	Hesitant	Hesitant	Hesitant	Hesitant	Hesitant	Confident	Hesitant	Confident	Hesitant	Confident	Hesitant	Hesitant	Hesitant	Hesitant	Hesitant	Confident	Hesitant	Hesitant	Hesitant	Confident	Confident	Hesitant	Strongly Disagree	Agree	Strongly Agree	Agree	Agree	Agree	Disagree	Strongly Disagree	Disagree	Agree	Nurse		Other		178	Fewer than 10 years	46 to 55 years old	Advanced degree (Master's, Doctorate, etc.)	Urban	Yes	White, European American, or European		Woman
Very Confident	Very Confident	Confident	Confident	Very Confident	Confident	Confident	Hesitant	Hesitant	Hesitant	Confident	Hesitant	Hesitant	Hesitant	Hesitant	Hesitant	Hesitant	Hesitant	Confident	Hesitant	Hesitant	Hesitant	Hesitant	Disagree	Disagree	Agree	Agree	Disagree	Agree	Disagree	Disagree	Disagree	Agree	Nurse		Other	ICCU	170	Fewer than 10 years	36 to 45 years old	College 4 years or more (college graduate)	Rural	Yes	White, European American, or European		Man
Confident	Confident	Hesitant	Hesitant	Hesitant	Confident	Confident	Hesitant	Hesitant	Hesitant	Hesitant	Hesitant	Hesitant	Hesitant	Hesitant	Hesitant	Hesitant	Not Confident	Not Confident	Not Confident	Hesitant	Hesitant	Hesitant	Disagree	Disagree	Disagree	Disagree	Disagree	Disagree	Disagree	Disagree	Disagree	Agree	Nurse		Other			10-19 years	56 to 65 years old	College 4 years or more (college graduate)	Rural	Yes	White, European American, or European		Man
Very Confident	Confident	Confident	Hesitant	Confident	Very Confident	Very Confident	Hesitant	Hesitant	Hesitant	Confident	Not Confident	Not Confident	Not Confident	Not Confident	Not Confident	Not Confident	Not Confident	Very Confident	Not Confident	Not Confident	Hesitant	Hesitant	Strongly Disagree	Strongly Disagree	Strongly Agree	Strongly Agree	Agree	Agree	Strongly Disagree	Strongly Disagree	Strongly Disagree	Agree	Nurse		Other	critical care	187	30 years or more	66 to 75 years old	1 to 3 years after high school (some college, Associate's degree, or technical school)	Suburban	Yes	White, European American, or European		Woman
Confident	Hesitant	Hesitant	Not Confident	Hesitant	Confident	Confident	Not Confident	Not Confident	Not Confident	Not Confident	Not Confident	Not Confident	Not Confident	Not Confident	Not Confident	Not Confident	Not Confident	Not Confident	Not Confident	Not Confident	Not Confident	Not Confident	Strongly Disagree	Disagree	Agree	Agree	Disagree	Disagree	Strongly Disagree	Strongly Disagree	Strongly Disagree	Strongly Agree	Nurse		Other		170	30 years or more	26 to 35 years old	1 to 3 years after high school (some college, Associate's degree, or technical school)	Suburban	Yes	White, European American, or European		Woman
Very Confident	Hesitant	Hesitant	Hesitant	Hesitant	Confident	Confident	Hesitant	Hesitant	Hesitant	Hesitant	Not Confident	Not Confident	Not Confident	Not Confident	Not Confident	Not Confident	Hesitant	Hesitant	Hesitant	Hesitant	Hesitant	Hesitant	Disagree	Disagree	Agree	Disagree	Disagree	Disagree	Disagree	Strongly Disagree	Strongly Disagree	Agree	Nurse		Other		184	Fewer than 10 years	Prefer not to answer.	Prefer not to answer.	Suburban	Yes	White, European American, or European		Woman
Confident	Hesitant	Not Confident	Not Confident	Not Confident	Hesitant	Confident	Not Confident	Not Confident	Not Confident	Hesitant	Not Confident	Not Confident	Not Confident	Not Confident	Not Confident	Not Confident	Not Confident	Hesitant	Not Confident	Not Confident	Not Confident	Not Confident	Disagree	Disagree	Strongly Agree	Agree	Agree	Agree	Strongly Disagree	Strongly Disagree	Strongly Disagree	Agree	Nurse		Other	CTICU	178	20-29 years	46 to 55 years old	College 4 years or more (college graduate)	Rural	Yes	White, European American, or European		Woman
Confident	Confident	Hesitant	Confident	Confident	Confident	Confident	Hesitant	Hesitant	Hesitant	Hesitant	Hesitant	Hesitant	Hesitant	Hesitant	Hesitant	Hesitant	Hesitant	Confident	Hesitant	Confident	Confident	Hesitant	Disagree	Disagree	Agree	Agree	Disagree	Disagree	Disagree	Disagree	Disagree	Agree	Nurse		Other			Fewer than 10 years	26 to 35 years old	College 4 years or more (college graduate)	Suburban	Yes	White, European American, or European		Woman
Not Confident	Not Confident	Not Confident	Not Confident	Hesitant	Hesitant	Hesitant	Not Confident	Not Confident	Not Confident	Not Confident	Not Confident	Not Confident	Not Confident	Not Confident	Not Confident	Not Confident	Not Confident	Not Confident	Not Confident	Not Confident	Not Confident	Not Confident	Strongly Disagree	Strongly Disagree	Strongly Agree	Disagree	Disagree	Disagree	Strongly Disagree	Strongly Disagree	Strongly Disagree	Agree	Nurse		Other	neuro trauma	185	Fewer than 10 years	26 to 35 years old	1 to 3 years after high school (some college, Associate's degree, or technical school)	Rural	Yes	White, European American, or European		Woman
Confident	Hesitant	Confident	Hesitant	Hesitant	Hesitant	Hesitant	Not Confident	Confident	Not Confident	Hesitant	Hesitant	Hesitant	Hesitant	Hesitant	Hesitant	Hesitant	Not Confident	Not Confident	Not Confident	Hesitant	Confident	Not Confident	Agree	Agree	Disagree	Agree	Strongly Agree	Strongly Agree	Disagree	Strongly Disagree	Disagree	Agree	Nurse		OB/GYN		178	Fewer than 10 years	26 to 35 years old	College 4 years or more (college graduate)	Suburban	Yes	White, European American, or European		Woman
Very Confident	Very Confident	Very Confident	Confident	Very Confident	Very Confident	Very Confident	Very Confident	Very Confident	Very Confident	Very Confident	Not Confident	Not Confident	Not Confident	Not Confident	Not Confident	Not Confident	Not Confident	Very Confident	Confident	Very Confident	Very Confident	Very Confident	Strongly Disagree	Disagree	Agree	Strongly Agree	Disagree	Agree	Strongly Disagree	Strongly Disagree	Strongly Disagree	Strongly Agree	Nurse		Other		178	10-19 years	46 to 55 years old	College 4 years or more (college graduate)	Rural	Yes	Prefer not to answer.		Woman
Confident	Confident	Not Confident	Not Confident	Hesitant	Very Confident	Very Confident	Confident	Hesitant	Hesitant	Confident	Hesitant	Hesitant	Hesitant	Hesitant	Hesitant	Hesitant	Hesitant	Hesitant	Hesitant	Hesitant	Hesitant	Hesitant	Strongly Disagree	Strongly Disagree	Strongly Agree	Strongly Agree	Strongly Agree	Strongly Agree	Agree	Strongly Disagree	Strongly Disagree	Strongly Agree	Nurse		Pediatrics		178	Fewer than 10 years	26 to 35 years old	College 4 years or more (college graduate)	Rural	Yes	White, European American, or European		Woman
Confident	Confident	Hesitant	Not Confident	Hesitant	Hesitant	Hesitant	Not Confident	Not Confident	Not Confident	Hesitant	Not Confident	Not Confident	Not Confident	Not Confident	Hesitant	Not Confident	Not Confident	Hesitant	Not Confident	Not Confident	Not Confident	Not Confident	Strongly Disagree	Disagree	Agree	Agree	Disagree	Strongly Disagree	Strongly Disagree	Strongly Disagree	Strongly Disagree	Agree	Nurse		Other	telemetry	170	10-19 years	26 to 35 years old	1 to 3 years after high school (some college, Associate's degree, or technical school)	Rural	Yes	White, European American, or European		Woman
Very Confident	Confident	Confident	Confident	Confident	Hesitant	Confident	Hesitant	Hesitant	Confident	Hesitant	Hesitant	Not Confident	Hesitant	Not Confident	Hesitant	Not Confident	Not Confident	Hesitant	Not Confident	Hesitant	Hesitant	Confident	Disagree	Disagree	Agree	Disagree	Agree	Disagree	Disagree	Strongly Disagree	Strongly Disagree	Strongly Agree	Nurse		Other	Peri-Anesthesia Care Unit	178	10-19 years	26 to 35 years old	College 4 years or more (college graduate)	Rural	Yes	White, European American, or European		Woman
Very Confident	Confident	Confident	Hesitant	Confident	Very Confident	Very Confident	Confident	Hesitant	Hesitant	Hesitant	Confident	Confident	Hesitant	Hesitant	Confident	Confident	Hesitant	Confident	Confident	Hesitant	Hesitant		Disagree	Disagree	Disagree	Disagree	Disagree	Disagree	Disagree	Disagree	Disagree	Agree	Nurse		Other		178	Fewer than 10 years	26 to 35 years old	College 4 years or more (college graduate)	Rural	Yes	White, European American, or European		Woman
Hesitant	Hesitant	Hesitant	Hesitant	Hesitant	Hesitant	Hesitant	Hesitant	Hesitant	Hesitant	Hesitant	Hesitant	Hesitant	Hesitant	Hesitant	Hesitant	Hesitant	Hesitant	Hesitant	Hesitant	Hesitant	Hesitant	Hesitant	Disagree	Disagree	Agree	Disagree	Agree	Agree	Disagree	Disagree	Disagree	Agree	Nurse		Pediatrics		178	20-29 years	56 to 65 years old	College 4 years or more (college graduate)	Rural	Yes	White, European American, or European		Woman
Hesitant	Hesitant	Hesitant	Hesitant	Hesitant	Hesitant	Confident	Hesitant	Hesitant	Hesitant	Hesitant	Hesitant	Hesitant	Hesitant	Hesitant	Confident	Confident	Hesitant	Confident	Hesitant	Hesitant	Hesitant	Hesitant
Hesitant	Hesitant	Not Confident	Confident	Confident	Confident	Confident	Not Confident	Not Confident	Not Confident	Not Confident	Not Confident	Not Confident	Not Confident	Not Confident	Not Confident	Not Confident	Not Confident	Not Confident	Not Confident	Not Confident	Not Confident	Hesitant
Hesitant	Hesitant	Hesitant	Not Confident	Not Confident	Hesitant	Hesitant	Hesitant	Hesitant	Not Confident	Not Confident	Hesitant	Hesitant	Hesitant	Hesitant	Hesitant	Hesitant	Not Confident	Confident	Hesitant	Hesitant	Confident	Hesitant	Strongly Disagree	Disagree	Agree	Agree	Agree	Strongly Agree	Strongly Disagree	Strongly Disagree	Strongly Disagree	Agree	Physician		Other	Orthopedics	178	10-19 years	46 to 55 years old	Advanced degree (Master's, Doctorate, etc.)	Rural	Yes	White, European American, or European		Man
Hesitant	Hesitant	Hesitant	Hesitant	Hesitant	Hesitant	Hesitant	Hesitant	Hesitant	Hesitant	Hesitant	Hesitant	Hesitant	Hesitant	Hesitant	Hesitant	Hesitant	Hesitant	Hesitant	Hesitant	Hesitant	Hesitant	Hesitant	Disagree	Disagree	Agree	Agree	Disagree	Disagree	Disagree	Disagree	Disagree	Agree	Nurse		Other	SDS	178	30 years or more	56 to 65 years old	College 4 years or more (college graduate)	Suburban	Yes	White, European American, or European		Woman
Confident	Hesitant	Not Confident	Not Confident	Not Confident	Hesitant	Hesitant	Not Confident	Not Confident	Not Confident	Not Confident	Hesitant	Not Confident	Not Confident	Not Confident	Hesitant	Not Confident	Not Confident	Confident	Not Confident	Not Confident	Not Confident	Not Confident	Strongly Disagree	Disagree	Strongly Disagree	Strongly Disagree	Disagree	Agree	Strongly Disagree	Strongly Disagree	Strongly Disagree	Agree	Nurse		Other	case management	168	10-19 years	46 to 55 years old	College 4 years or more (college graduate)	Rural	Yes	White, European American, or European		Woman
Hesitant	Hesitant	Hesitant	Not Confident	Not Confident	Not Confident	Very Confident	Not Confident	Not Confident	Not Confident	Not Confident	Not Confident	Not Confident	Not Confident	Not Confident	Not Confident	Not Confident	Not Confident	Not Confident	Not Confident	Not Confident	Not Confident	Not Confident	Strongly Disagree	Strongly Disagree	Strongly Agree	Strongly Disagree	Strongly Disagree	Disagree	Strongly Disagree	Strongly Disagree	Strongly Disagree	Strongly Agree		psychologist	Psychiatry		178	30 years or more	66 to 75 years old	Advanced degree (Master's, Doctorate, etc.)	Rural	Yes	White, European American, or European		Man
Confident	Hesitant	Hesitant	Hesitant	Confident	Hesitant	Hesitant	Not Confident	Not Confident	Hesitant	Not Confident	Hesitant	Not Confident	Not Confident	Not Confident	Not Confident	Not Confident	Not Confident	Confident	Not Confident	Not Confident	Hesitant	Not Confident	Strongly Disagree	Strongly Disagree	Agree	Disagree	Strongly Agree	Agree	Strongly Disagree	Disagree	Strongly Disagree	Strongly Agree	Nurse		Emergency		178	30 years or more	56 to 65 years old	1 to 3 years after high school (some college, Associate's degree, or technical school)	Rural	Yes	White, European American, or European		Man
Very Confident	Very Confident	Very Confident	Very Confident	Very Confident	Very Confident	Very Confident	Confident	Confident	Confident	Confident	Confident	Confident	Very Confident	Confident	Confident	Confident	Hesitant	Hesitant	Hesitant	Hesitant	Hesitant	Hesitant
Very Confident	Very Confident	Very Confident	Very Confident	Very Confident	Very Confident	Very Confident	Very Confident	Very Confident	Very Confident	Very Confident	Confident	Confident	Confident	Hesitant	Confident	Confident	Confident	Very Confident	Very Confident	Confident	Very Confident	Very Confident	Disagree	Disagree	Strongly Agree	Strongly Agree	Agree	Agree	Disagree	Agree	Strongly Agree	Agree	Nurse	Pediatric Sexual Assault Nurse Examiner	Pediatrics	Emergency Department [REDACTED] Child Advocacy Center	178	20-29 years	56 to 65 years old	College 4 years or more (college graduate)	Rural	Yes	White, European American, or European		Woman
Confident	Confident	Confident	Confident	Confident	Confident	Confident	Confident	Confident	Hesitant	Confident	Hesitant	Hesitant	Hesitant	Hesitant	Confident	Confident	Hesitant	Confident	Hesitant	Confident	Hesitant	Confident	Disagree	Disagree	Agree	Agree	Disagree	Disagree	Disagree	Agree	Disagree	Agree	Physician		Other	f p	178	30 years or more	46 to 55 years old	Advanced degree (Master's, Doctorate, etc.)	Rural	Yes	White, European American, or European		Man
Very Confident	Hesitant	Hesitant	Not Confident	Hesitant	Confident	Confident	Hesitant	Hesitant	Hesitant	Hesitant	Not Confident	Hesitant	Hesitant	Not Confident	Hesitant	Not Confident	Hesitant	Confident	Hesitant	Not Confident	Hesitant	Confident	Disagree	Disagree	Agree	Strongly Agree	Strongly Agree	Strongly Agree	Disagree	Disagree	Agree	Agree	Physician		Other	Internal Medicine	178	30 years or more	66 to 75 years old	Advanced degree (Master's, Doctorate, etc.)	Urban	Yes	White, European American, or European		Man
Very Confident	Confident		Confident	Confident	Very Confident	Very Confident	Hesitant	Hesitant	Hesitant	Hesitant	Not Confident	Not Confident	Not Confident	Not Confident	Not Confident	Not Confident	Not Confident	Hesitant	Not Confident	Hesitant	Not Confident	Not Confident	Disagree	Strongly Disagree	Agree	Strongly Agree	Agree	Agree	Strongly Disagree	Disagree	Strongly Disagree	Strongly Agree	Nurse		Other	out patient heme/onc and hfam6	178	20-29 years	36 to 45 years old	College 4 years or more (college graduate)	Rural	Yes	White, European American, or European		Woman
Not Confident	Not Confident	Not Confident	Hesitant	Very Confident	Very Confident	Very Confident	Not Confident		Not Confident	Not Confident	Not Confident	Not Confident	Not Confident	Not Confident	Not Confident	Not Confident	Not Confident	Confident	Not Confident	Confident	Hesitant	Not Confident	Disagree	Disagree	Agree	Strongly Agree	Agree	Disagree	Strongly Disagree	Strongly Disagree	Strongly Disagree	Strongly Agree	Nurse		Other	Operating Room	178	Fewer than 10 years	36 to 45 years old	College 4 years or more (college graduate)	Rural	Yes	White, European American, or European		Woman
Confident	Confident	Very Confident	Very Confident		Very Confident	Very Confident	Confident	Confident	Hesitant	Confident	Very Confident	Very Confident	Very Confident	Very Confident	Very Confident	Very Confident	Confident	Very Confident	Very Confident	Very Confident	Confident	Very Confident	Disagree	Strongly Disagree	Strongly Agree	Strongly Agree	Agree	Agree	Strongly Disagree	Disagree	Strongly Disagree	Strongly Agree	Nurse		Other	Operating Room	170	Fewer than 10 years	26 to 35 years old	College 4 years or more (college graduate)	Rural	Yes	White, European American, or European		Woman
Hesitant	Hesitant	Hesitant	Not Confident	Hesitant	Hesitant	Confident	Hesitant	Hesitant	Hesitant	Hesitant	Not Confident	Hesitant	Hesitant	Hesitant	Hesitant	Hesitant	Hesitant	Hesitant	Hesitant	Confident	Confident	Hesitant	Strongly Disagree	Agree	Disagree	Agree	Agree	Agree	Disagree	Strongly Disagree	Strongly Disagree	Agree	Nurse		Prefer not to answer.		187	10-19 years	26 to 35 years old	College 4 years or more (college graduate)	Rural	Yes	White, European American, or European		Woman
Confident	Hesitant	Hesitant	Hesitant	Hesitant	Hesitant	Hesitant	Hesitant	Hesitant	Hesitant	Hesitant	Hesitant	Hesitant	Hesitant	Hesitant	Hesitant	Hesitant	Hesitant	Hesitant	Hesitant	Hesitant		Hesitant	Disagree	Disagree	Disagree	Disagree	Disagree	Disagree	Disagree	Disagree	Disagree	Disagree	Nurse		Emergency			Fewer than 10 years	26 to 35 years old	College 4 years or more (college graduate)	Rural	Yes	White, European American, or European		Woman
Confident	Hesitant	Not Confident	Not Confident	Not Confident	Hesitant	Confident	Hesitant		Not Confident	Not Confident	Not Confident	Not Confident		Not Confident	Not Confident	Not Confident	Not Confident	Confident	Not Confident	Not Confident	Confident	Confident	Disagree	Disagree	Disagree	Agree	Strongly Disagree	Disagree	Strongly Disagree	Strongly Disagree	Strongly Disagree	Strongly Agree	Nurse		Other		187	30 years or more	56 to 65 years old	College 4 years or more (college graduate)	Suburban	Yes	White, European American, or European		Woman
Confident	Confident	Confident	Confident	Hesitant	Confident	Confident	Hesitant	Hesitant	Not Confident	Not Confident	Not Confident	Not Confident	Not Confident	Not Confident	Not Confident	Not Confident	Not Confident	Not Confident	Not Confident	Not Confident	Not Confident	Not Confident	Agree	Disagree	Strongly Agree	Agree	Strongly Disagree	Disagree	Strongly Disagree	Strongly Disagree	Agree	Agree	Nurse		Other	ICU	170	10-19 years	26 to 35 years old	Advanced degree (Master's, Doctorate, etc.)	Rural	Yes	White, European American, or European		Woman
Confident	Confident	Hesitant	Not Confident	Hesitant	Confident	Confident	Hesitant	Confident	Confident	Confident	Hesitant	Hesitant	Hesitant	Hesitant	Hesitant	Confident	Confident	Confident	Hesitant	Hesitant	Confident	Confident	Disagree	Disagree	Agree	Agree	Agree	Agree	Disagree	Strongly Disagree	Strongly Disagree	Strongly Agree	Nurse		Other	medical surgical	178	20-29 years	36 to 45 years old	Advanced degree (Master's, Doctorate, etc.)	Rural	Yes	White, European American, or European		Woman
Very Confident	Very Confident	Very Confident	Very Confident	Very Confident	Very Confident	Very Confident	Very Confident	Very Confident	Very Confident	Very Confident	Very Confident	Very Confident	Very Confident	Very Confident	Very Confident	Very Confident	Very Confident	Very Confident	Very Confident	Very Confident	Very Confident	Very Confident	Strongly Disagree	Disagree	Strongly Agree	Agree	Agree	Agree	Agree	Agree	Disagree	Agree	Physician		Other	Family Medicine.	166	30 years or more	56 to 65 years old	Advanced degree (Master's, Doctorate, etc.)	Rural	Yes	White, European American, or European		Man
Hesitant	Confident	Hesitant	Not Confident	Hesitant	Confident	Confident	Not Confident	Not Confident	Not Confident	Not Confident	Not Confident	Not Confident	Not Confident	Not Confident	Not Confident	Not Confident	Not Confident	Not Confident	Not Confident	Not Confident	Not Confident	Hesitant	Strongly Disagree	Strongly Disagree	Agree	Agree	Agree	Disagree	Strongly Disagree	Strongly Disagree	Strongly Disagree	Strongly Agree	Nurse		Emergency		178	10-19 years	26 to 35 years old	College 4 years or more (college graduate)	Suburban	Yes	White, European American, or European		Woman
Hesitant	Not Confident	Not Confident	Not Confident	Not Confident	Hesitant	Hesitant	Hesitant	Hesitant	Hesitant	Hesitant	Not Confident	Not Confident	Not Confident	Not Confident	Not Confident	Not Confident	Not Confident	Not Confident	Not Confident	Not Confident	Not Confident	Not Confident	Disagree	Disagree	Agree	Agree	Agree	Disagree	Disagree	Disagree	Disagree	Agree	Nurse		Other	Anesthesia	178	10-19 years	36 to 45 years old	College 4 years or more (college graduate)	Rural	Yes	White, European American, or European		Woman
Confident	Confident	Hesitant	Hesitant	Hesitant	Hesitant	Hesitant	Hesitant	Hesitant	Not Confident	Not Confident	Not Confident	Not Confident	Not Confident	Not Confident	Not Confident	Not Confident	Not Confident	Hesitant	Not Confident	Not Confident	Not Confident	Hesitant	Agree	Disagree	Agree	Disagree	Agree	Agree	Disagree	Disagree	Disagree	Disagree	Physician				178	20-29 years	56 to 65 years old	Advanced degree (Master's, Doctorate, etc.)	Rural	Yes	White, European American, or European		Woman
Hesitant	Hesitant	Hesitant	Very Confident	Very Confident	Very Confident		Hesitant	Hesitant	Hesitant	Confident	Not Confident	Not Confident	Not Confident	Not Confident	Not Confident	Not Confident	Not Confident	Very Confident	Hesitant	Very Confident	Hesitant	Hesitant	Strongly Disagree	Strongly Disagree	Strongly Disagree	Agree	Agree	Agree	Strongly Disagree	Strongly Disagree	Strongly Disagree	Agree	Nurse		Other	icu	178	20-29 years	56 to 65 years old	1 to 3 years after high school (some college, Associate's degree, or technical school)	Rural	Yes	White, European American, or European		Woman
Hesitant	Not Confident	Not Confident	Not Confident	Not Confident	Hesitant	Hesitant	Not Confident	Not Confident	Not Confident	Not Confident	Not Confident	Not Confident	Not Confident	Not Confident	Not Confident	Not Confident	Not Confident	Not Confident	Not Confident	Not Confident	Not Confident	Not Confident	Disagree	Agree	Disagree	Agree	Agree	Agree	Strongly Disagree	Strongly Disagree	Strongly Disagree	Agree	Nurse		Other		178	10-19 years	26 to 35 years old	College 4 years or more (college graduate)	Rural	Yes	White, European American, or European		Woman
Very Confident	Very Confident	Confident	Confident	Confident	Confident	Very Confident	Confident	Not Confident	Not Confident	Not Confident	Not Confident	Not Confident	Not Confident	Not Confident	Not Confident	Not Confident	Not Confident	Very Confident	Hesitant	Hesitant	Hesitant	Hesitant	Strongly Disagree	Strongly Disagree	Strongly Agree	Strongly Agree	Agree	Agree	Strongly Disagree	Disagree	Strongly Disagree	Strongly Agree	Nurse		Other	OR	178	10-19 years	36 to 45 years old	College 4 years or more (college graduate)	Rural	Yes	White, European American, or European		Woman
Hesitant	Not Confident	Not Confident	Not Confident	Hesitant	Hesitant	Confident	Not Confident	Not Confident	Not Confident	Hesitant	Not Confident	Not Confident	Not Confident	Not Confident	Not Confident	Not Confident	Confident	Confident	Not Confident	Hesitant	Hesitant	Not Confident	Strongly Disagree	Disagree	Agree	Disagree	Disagree	Disagree	Disagree	Strongly Disagree	Disagree	Strongly Agree	Nurse		Other	operating room	178	20-29 years	46 to 55 years old	College 4 years or more (college graduate)	Prefer not to answer.	Yes	White, European American, or European		Woman
Hesitant	Hesitant	Not Confident	Hesitant	Confident	Confident	Confident	Not Confident	Not Confident	Not Confident	Hesitant	Not Confident	Not Confident	Not Confident	Not Confident	Not Confident	Not Confident	Hesitant	Confident	Confident	Hesitant	Confident	Hesitant
Hesitant	Hesitant	Not Confident	Not Confident	Hesitant	Confident	Confident	Hesitant	Hesitant	Hesitant	Hesitant	Not Confident	Not Confident	Not Confident	Not Confident	Not Confident	Not Confident	Not Confident	Confident	Not Confident	Not Confident	Not Confident	Not Confident	Disagree	Agree	Strongly Agree	Agree	Agree	Agree	Strongly Disagree	Disagree	Strongly Disagree	Agree	Nurse		Pediatrics		178	10-19 years	36 to 45 years old	College 4 years or more (college graduate)	Suburban	Yes	White, European American, or European		Woman
Confident	Confident	Not Confident	Not Confident	Hesitant	Hesitant	Confident	Not Confident	Not Confident	Confident	Not Confident	Not Confident	Not Confident	Not Confident	Not Confident	Hesitant	Hesitant	Confident	Confident	Not Confident	Hesitant	Confident	Confident	Disagree	Agree	Strongly Agree	Agree	Disagree	Agree	Disagree	Strongly Disagree	Strongly Disagree	Agree	Physician		Other	Family Practice	178	Fewer than 10 years	26 to 35 years old	Advanced degree (Master's, Doctorate, etc.)	Rural	Yes	White, European American, or European		Man
Confident	Not Confident	Not Confident	Not Confident	Hesitant	Hesitant	Not Confident	Not Confident	Not Confident	Not Confident	Not Confident	Not Confident	Not Confident	Not Confident	Not Confident	Not Confident	Not Confident	Not Confident	Not Confident	Not Confident	Not Confident	Not Confident	Not Confident	Disagree	Disagree	Agree	Disagree	Disagree	Disagree	Disagree	Disagree	Disagree	Strongly Agree	Nurse		Other	Pain Clinic	187	30 years or more	66 to 75 years old	1 to 3 years after high school (some college, Associate's degree, or technical school)	Rural	Yes	White, European American, or European		Woman
Hesitant	Hesitant	Hesitant	Not Confident	Not Confident	Hesitant	Hesitant	Hesitant	Not Confident	Not Confident	Not Confident	Not Confident	Not Confident	Not Confident	Not Confident	Not Confident	Not Confident	Not Confident	Not Confident	Not Confident	Not Confident	Not Confident	Not Confident	Disagree	Disagree	Agree	Agree	Agree	Agree	Agree	Strongly Disagree	Strongly Disagree	Strongly Disagree	Nurse		Prefer not to answer.		170	10-19 years	46 to 55 years old	College 4 years or more (college graduate)	Suburban	Yes	White, European American, or European		Woman
Confident	Confident	Hesitant	Hesitant	Confident	Confident	Hesitant	Hesitant	Not Confident	Hesitant	Hesitant	Hesitant	Hesitant	Hesitant	Hesitant	Hesitant	Hesitant	Hesitant	Confident	Confident	Hesitant	Confident	Hesitant	Strongly Disagree	Disagree	Strongly Agree	Agree	Disagree	Disagree	Disagree	Strongly Disagree	Strongly Disagree	Strongly Agree	Nurse		Other	med surg floor	178	Fewer than 10 years	46 to 55 years old	College 4 years or more (college graduate)	Rural	Yes	White, European American, or European		Woman
Confident	Confident	Confident	Not Confident	Confident	Confident	Confident	Hesitant	Hesitant	Hesitant	Confident	Not Confident	Not Confident	Not Confident	Not Confident	Hesitant	Not Confident	Not Confident	Confident	Hesitant	Hesitant	Hesitant	Hesitant	Disagree	Disagree	Agree	Agree	Agree	Agree	Disagree	Strongly Disagree	Strongly Disagree	Strongly Agree	Nurse		Other	REDACTED	184	30 years or more	56 to 65 years old	College 4 years or more (college graduate)	Rural	Yes	Hispanic, Latino, or Spanish		Man
Hesitant	Not Confident	Not Confident	Confident	Not Confident	Hesitant	Confident	Not Confident	Not Confident	Hesitant	Not Confident	Not Confident	Hesitant	Hesitant	Hesitant	Hesitant	Not Confident	Not Confident	Hesitant	Hesitant	Hesitant	Hesitant	Hesitant	Strongly Disagree	Disagree	Agree	Agree	Disagree	Disagree	Disagree	Disagree	Disagree	Agree	Physician		Pediatrics		178	20-29 years	46 to 55 years old	Advanced degree (Master's, Doctorate, etc.)	Rural	Yes	White, European American, or European		Man
Confident	Hesitant	Not Confident	Not Confident	Hesitant	Hesitant	Hesitant	Hesitant	Hesitant	Not Confident	Not Confident	Not Confident	Not Confident	Not Confident	Not Confident	Not Confident	Not Confident	Not Confident	Not Confident	Not Confident	Not Confident	Not Confident	Not Confident	Disagree	Disagree	Strongly Agree	Agree	Agree	Agree	Disagree	Strongly Disagree	Disagree	Strongly Agree	Nurse		Other		178	30 years or more	66 to 75 years old	1 to 3 years after high school (some college, Associate's degree, or technical school)	Rural	Yes	White, European American, or European		Woman
Hesitant	Hesitant	Not Confident	Not Confident	Not Confident	Not Confident	Not Confident	Hesitant	Hesitant	Hesitant	Hesitant	Confident	Hesitant	Hesitant	Hesitant	Hesitant	Hesitant	Hesitant	Hesitant	Not Confident	Not Confident	Not Confident	Not Confident	Disagree	Disagree	Strongly Agree	Strongly Agree	Strongly Agree	Agree	Disagree	Strongly Disagree	Strongly Disagree	Strongly Agree	Nurse		Other	surgical	170	10-19 years	46 to 55 years old	College 4 years or more (college graduate)	Rural	No	Asian	Japan	Woman
Confident	Hesitant	Not Confident	Not Confident	Hesitant	Hesitant	Confident	Hesitant	Not Confident	Not Confident	Hesitant	Not Confident	Not Confident	Not Confident	Not Confident	Not Confident	Not Confident	Not Confident	Not Confident	Hesitant	Hesitant	Not Confident	Hesitant	Strongly Disagree	Strongly Disagree	Strongly Agree		Agree	Strongly Agree	Disagree	Strongly Disagree	Strongly Disagree	Strongly Agree	Physician		Prefer not to answer.		178	20-29 years	46 to 55 years old	Advanced degree (Master's, Doctorate, etc.)	Rural	No	Black, African American, or African		Man
Confident	Confident	Confident	Confident	Confident	Confident	Confident	Confident	Confident	Confident	Confident	Confident	Confident	Hesitant	Confident	Confident	Confident	Confident	Confident	Confident	Confident	Confident	Confident	Disagree	Disagree	Disagree	Disagree	Disagree	Disagree	Disagree	Disagree	Disagree	Agree	Nurse		Other	CSU/EP	187	Fewer than 10 years	26 to 35 years old	1 to 3 years after high school (some college, Associate's degree, or technical school)	Rural	Yes	White, European American, or European		Woman
Very Confident	Very Confident	Very Confident	Very Confident	Very Confident	Very Confident	Very Confident	Very Confident	Confident	Confident	Confident	Not Confident	Not Confident	Not Confident	Not Confident	Not Confident	Not Confident	Hesitant	Hesitant	Hesitant	Confident	Hesitant	Confident	Disagree	Strongly Disagree	Agree	Agree	Agree	Disagree	Disagree	Disagree	Agree	Agree	Physician		Psychiatry		178	Fewer than 10 years	36 to 45 years old	Advanced degree (Master's, Doctorate, etc.)	Rural	Yes	White, European American, or European		Woman
Confident	Confident	Hesitant	Not Confident	Hesitant	Hesitant	Hesitant	Not Confident	Not Confident	Not Confident	Hesitant	Not Confident	Not Confident	Not Confident	Not Confident	Not Confident	Not Confident	Not Confident	Not Confident	Not Confident	Not Confident	Not Confident	Hesitant	Strongly Disagree	Strongly Disagree	Strongly Agree	Strongly Agree	Agree	Agree	Disagree	Strongly Disagree	Strongly Disagree	Agree	Nurse		Other	Health Care Quality Unit	166	30 years or more	46 to 55 years old	1 to 3 years after high school (some college, Associate's degree, or technical school)	Rural	Yes	White, European American, or European		Woman
Hesitant	Hesitant	Not Confident	Not Confident	Not Confident	Hesitant		Hesitant	Not Confident	Not Confident	Not Confident	Not Confident	Not Confident	Not Confident	Not Confident	Not Confident	Not Confident	Not Confident	Hesitant	Not Confident	Hesitant	Not Confident	Not Confident	Disagree	Disagree	Agree	Agree	Disagree	Disagree	Disagree	Disagree	Disagree	Strongly Agree	Physician		Other		170	20-29 years	56 to 65 years old	Advanced degree (Master's, Doctorate, etc.)	Suburban	Yes	White, European American, or European		Woman
Confident	Confident	Hesitant	Hesitant	Confident	Confident	Confident	Not Confident	Not Confident	Confident	Not Confident	Not Confident	Not Confident	Not Confident	Not Confident	Not Confident	Not Confident	Not Confident	Not Confident	Not Confident	Not Confident	Not Confident	Hesitant	Disagree	Disagree	Strongly Agree	Strongly Agree	Strongly Agree	Disagree	Strongly Disagree	Agree	Strongly Disagree	Strongly Agree	Nurse		Other	float nurse	178	30 years or more	56 to 65 years old	1 to 3 years after high school (some college, Associate's degree, or technical school)	Rural	Yes	White, European American, or European		Woman
Confident	Confident	Hesitant	Hesitant	Hesitant	Confident	Confident	Hesitant	Hesitant	Confident	Confident	Not Confident	Not Confident	Not Confident	Not Confident	Hesitant	Not Confident	Not Confident	Not Confident	Not Confident	Not Confident	Not Confident	Not Confident	Agree	Disagree	Agree	Disagree	Agree	Disagree		Strongly Disagree	Strongly Disagree	Agree	Physician		Other	outpatient	170	Fewer than 10 years	36 to 45 years old	Advanced degree (Master's, Doctorate, etc.)	Suburban	Yes	Prefer not to answer.		Man
Confident	Confident	Hesitant	Hesitant	Hesitant	Confident	Confident	Hesitant	Hesitant	Hesitant	Confident	Hesitant	Hesitant	Hesitant	Hesitant	Confident	Hesitant	Not Confident	Hesitant	Not Confident	Hesitant	Hesitant	Hesitant	Strongly Disagree	Agree	Strongly Agree	Disagree	Agree	Agree	Strongly Disagree	Strongly Disagree	Strongly Disagree	Agree	Nurse		Other	Ophthalmology	187	10-19 years	36 to 45 years old	College 4 years or more (college graduate)	Suburban	Yes	White, European American, or European		Woman
Hesitant	Hesitant	Hesitant	Hesitant	Hesitant	Hesitant	Hesitant	Hesitant	Not Confident	Not Confident	Not Confident	Not Confident	Not Confident	Not Confident	Not Confident	Not Confident	Not Confident	Not Confident	Not Confident	Not Confident	Not Confident	Not Confident	Not Confident	Disagree	Disagree	Strongly Agree	Agree	Agree	Agree	Strongly Disagree	Disagree	Strongly Disagree	Strongly Agree	Nurse		Other	telemetry	185	10-19 years	36 to 45 years old	College 4 years or more (college graduate)	Urban	Yes	White, European American, or European		Woman
Not Confident	Hesitant	Not Confident	Not Confident	Not Confident	Hesitant	Confident	Not Confident	Not Confident	Not Confident	Not Confident	Not Confident	Not Confident	Not Confident	Not Confident	Not Confident	Not Confident	Not Confident	Not Confident	Not Confident	Not Confident	Not Confident	Not Confident	Strongly Disagree	Strongly Disagree	Agree	Strongly Disagree	Agree	Agree	Disagree	Strongly Disagree	Strongly Disagree	Strongly Agree	Other	Psychologist	Psychiatry		179	Fewer than 10 years	26 to 35 years old	Advanced degree (Master's, Doctorate, etc.)	Rural	Yes	Asian		Woman
Not Confident	Not Confident	Not Confident	Not Confident	Not Confident	Not Confident	Not Confident	Not Confident	Not Confident	Not Confident	Not Confident	Not Confident	Not Confident	Not Confident	Not Confident	Not Confident	Not Confident	Not Confident	Not Confident	Not Confident	Not Confident	Not Confident	Not Confident	Strongly Disagree	Strongly Disagree	Strongly Agree	Strongly Disagree	Strongly Disagree	Strongly Disagree	Strongly Disagree	Strongly Disagree	Strongly Disagree	Strongly Agree	Nurse		Other		185	10-19 years	36 to 45 years old	College 4 years or more (college graduate)	Suburban	Yes	White, European American, or European		Woman
Hesitant	Hesitant	Hesitant	Not Confident	Not Confident	Not Confident	Not Confident	Not Confident	Not Confident	Not Confident	Not Confident	Not Confident	Not Confident	Not Confident	Not Confident	Not Confident	Not Confident	Not Confident	Not Confident		Not Confident	Hesitant	Not Confident	Strongly Disagree	Disagree	Agree	Agree	Agree	Disagree	Strongly Disagree	Strongly Disagree	Strongly Disagree	Agree	Physician		Other	MSKI	168	Fewer than 10 years	36 to 45 years old	Advanced degree (Master's, Doctorate, etc.)	Rural	Yes	White, European American, or European		Man
Confident	Confident	Hesitant	Not Confident	Not Confident	Hesitant	Hesitant	Hesitant	Hesitant	Hesitant	Hesitant	Not Confident	Not Confident	Not Confident	Not Confident	Not Confident	Not Confident	Not Confident	Not Confident	Not Confident	Hesitant	Hesitant	Hesitant	Disagree	Disagree	Agree	Agree	Agree	Agree	Strongly Disagree	Strongly Disagree	Strongly Disagree	Agree	Nurse			Home Health	187	Fewer than 10 years	26 to 35 years old	College 4 years or more (college graduate)	Rural	Yes	White, European American, or European		Woman
Not Confident	Hesitant	Not Confident	Not Confident	Not Confident	Not Confident	Not Confident	Not Confident	Not Confident	Not Confident	Not Confident	Not Confident	Not Confident	Not Confident	Not Confident	Not Confident	Not Confident	Not Confident	Not Confident	Not Confident	Not Confident	Not Confident	Not Confident	Disagree	Agree	Agree	Disagree	Agree	Agree	Disagree	Disagree	Disagree	Disagree	Nurse		Other		178	Fewer than 10 years	46 to 55 years old	College 4 years or more (college graduate)	Rural	Yes	White, European American, or European		Woman
Hesitant	Not Confident	Not Confident	Not Confident	Not Confident	Not Confident	Not Confident	Not Confident	Not Confident	Not Confident	Not Confident	Not Confident	Not Confident	Not Confident	Not Confident	Not Confident	Not Confident	Not Confident	Not Confident	Not Confident	Not Confident	Not Confident	Not Confident	Disagree	Disagree	Agree	Disagree	Agree	Agree	Agree	Disagree	Disagree	Disagree	Nurse		Emergency		170	10-19 years	26 to 35 years old	College 4 years or more (college graduate)	Rural	Yes	White, European American, or European		Woman
Very Confident	Very Confident	Very Confident	Hesitant	Very Confident	Very Confident	Very Confident	Confident	Very Confident	Confident	Very Confident	Hesitant	Hesitant	Hesitant	Hesitant	Confident	Confident	Hesitant	Confident	Hesitant	Hesitant	Hesitant	Hesitant	Strongly Disagree	Strongly Disagree	Strongly Agree	Agree	Disagree	Agree	Strongly Disagree	Disagree	Strongly Disagree	Strongly Agree	Nurse		Other	PCU	187	Fewer than 10 years	26 to 35 years old	College 4 years or more (college graduate)	Rural	Yes	None of these fully describe me.	Mixed - black and latina	Woman
Confident	Hesitant	Hesitant	Hesitant	Hesitant	Confident	Confident	Hesitant	Hesitant	Hesitant	Confident	Not Confident	Not Confident	Not Confident	Not Confident	Hesitant	Not Confident	Hesitant	Hesitant	Hesitant	Hesitant	Hesitant	Confident	Strongly Disagree	Strongly Disagree	Strongly Agree	Agree	Agree	Agree	Strongly Disagree	Disagree	Strongly Disagree	Strongly Agree	Nurse		OB/GYN		170	20-29 years	46 to 55 years old	College 4 years or more (college graduate)	Rural	Yes	White, European American, or European		Woman
Hesitant	Hesitant	Not Confident	Not Confident	Hesitant	Hesitant	Hesitant	Hesitant	Hesitant	Hesitant	Hesitant	Not Confident	Not Confident	Not Confident	Not Confident	Not Confident	Not Confident	Not Confident	Hesitant	Hesitant	Hesitant	Hesitant	Hesitant	Disagree	Agree	Strongly Agree	Agree	Agree	Agree	Strongly Disagree	Disagree	Strongly Disagree	Strongly Agree	Nurse		Other	ICU	185	Fewer than 10 years	18 to 25 years old	College 4 years or more (college graduate)	Suburban	No	None of these fully describe me.	Multiracial	Woman
Confident	Hesitant	Hesitant	Not Confident	Hesitant	Confident	Confident	Not Confident	Not Confident	Not Confident	Not Confident	Not Confident	Not Confident	Not Confident	Not Confident	Not Confident	Not Confident	Not Confident	Confident	Not Confident	Not Confident	Not Confident	Not Confident	Agree	Disagree	Agree	Agree	Agree	Agree	Strongly Disagree	Strongly Disagree	Strongly Disagree	Strongly Disagree	Nurse		Prefer not to answer.		185	Fewer than 10 years	36 to 45 years old	College 4 years or more (college graduate)	Suburban	Yes	White, European American, or European		Woman
Confident	Hesitant	Not Confident	Not Confident	Not Confident	Confident	Confident	Not Confident	Not Confident	Confident	Confident	Not Confident	Not Confident	Not Confident	Not Confident	Not Confident	Not Confident	Not Confident	Not Confident	Not Confident	Not Confident	Not Confident	Not Confident	Strongly Agree	Disagree	Disagree	Agree	Agree	Agree	Strongly Disagree	Strongly Disagree	Strongly Disagree	Strongly Agree	Nurse		Other	ICU	187	Fewer than 10 years	26 to 35 years old	College 4 years or more (college graduate)	Rural	Yes	White, European American, or European		Woman
Confident	Confident	Confident	Not Confident	Hesitant	Confident	Hesitant	Hesitant	Hesitant	Hesitant	Hesitant	Not Confident	Not Confident	Not Confident	Not Confident	Not Confident	Not Confident	Hesitant	Confident	Hesitant	Confident	Confident	Confident	Strongly Disagree	Disagree	Agree	Disagree	Strongly Disagree	Disagree		Disagree	Strongly Agree	Agree	Nurse		Other	float departments	170	10-19 years	46 to 55 years old	Advanced degree (Master's, Doctorate, etc.)	Suburban	Yes	Hispanic, Latino, or Spanish	and caucasian (it does not allow for two choices)	Woman
Confident	Hesitant	Hesitant	Hesitant	Confident	Confident	Very Confident	Hesitant	Hesitant	Confident	Confident	Hesitant	Hesitant	Hesitant	Hesitant	Hesitant	Hesitant	Hesitant	Confident	Hesitant	Hesitant	Hesitant	Hesitant	Disagree	Disagree	Disagree	Agree	Agree	Agree	Disagree	Strongly Disagree	Strongly Disagree	Agree	Nurse		Other	AICU	178	Fewer than 10 years	18 to 25 years old	College 4 years or more (college graduate)	Rural	Yes	White, European American, or European		Woman
Confident	Confident	Hesitant	Hesitant	Very Confident	Confident	Confident	Hesitant	Not Confident	Not Confident	Not Confident	Not Confident	Not Confident	Not Confident	Not Confident	Not Confident	Not Confident	Not Confident	Confident	Not Confident	Not Confident	Not Confident	Hesitant	Disagree	Agree	Agree	Agree	Disagree	Disagree	Strongly Disagree	Strongly Disagree	Strongly Disagree	Strongly Agree	Nurse		Emergency		178	20-29 years	46 to 55 years old	1 to 3 years after high school (some college, Associate's degree, or technical school)	Rural	Yes	White, European American, or European		Woman
Confident	Hesitant	Not Confident	Not Confident	Hesitant	Hesitant	Hesitant	Not Confident	Not Confident	Not Confident	Not Confident	Not Confident	Not Confident	Not Confident	Not Confident	Not Confident	Not Confident	Not Confident	Confident	Confident	Not Confident	Not Confident	Hesitant	Strongly Disagree	Disagree	Strongly Agree	Agree	Agree	Disagree	Strongly Disagree	Strongly Disagree	Strongly Disagree	Agree	Nurse		Other		187	30 years or more	56 to 65 years old	College 4 years or more (college graduate)	Rural	Yes	White, European American, or European		Woman
Confident	Hesitant	Confident	Hesitant	Hesitant	Confident	Very Confident	Hesitant	Hesitant	Hesitant	Confident	Hesitant	Hesitant	Hesitant	Hesitant	Hesitant	Hesitant	Hesitant	Confident	Not Confident	Hesitant	Confident		Agree	Agree	Disagree	Agree	Disagree	Agree	Disagree	Disagree	Disagree	Agree	Nurse		Other	ICU	185	Fewer than 10 years	18 to 25 years old	College 4 years or more (college graduate)	Suburban	Yes	Hispanic, Latino, or Spanish		Woman
Confident	Hesitant	Hesitant	Hesitant	Confident	Hesitant	Hesitant	Hesitant	Not Confident	Not Confident	Not Confident	Not Confident	Not Confident	Not Confident	Not Confident	Not Confident	Not Confident	Not Confident	Hesitant	Not Confident	Confident	Hesitant	Confident	Disagree	Agree	Agree	Agree	Agree	Agree	Disagree	Disagree	Strongly Disagree	Agree	Nurse		Other	Med/Surg	187	Fewer than 10 years	18 to 25 years old	College 4 years or more (college graduate)	Suburban	Yes	None of these fully describe me.	biracial	Woman
Confident	Hesitant	Hesitant	Hesitant	Hesitant	Confident	Confident	Not Confident	Not Confident	Not Confident	Not Confident	Not Confident	Not Confident	Not Confident	Not Confident	Not Confident	Not Confident	Not Confident	Not Confident	Not Confident	Not Confident	Not Confident	Not Confident	Disagree	Disagree	Disagree	Agree	Disagree	Agree	Disagree	Disagree	Disagree	Disagree	Nurse		Other	Orthopedic	185	Fewer than 10 years	46 to 55 years old	College 4 years or more (college graduate)	Suburban	Yes	White, European American, or European		Woman
Confident	Hesitant	Hesitant	Hesitant	Confident	Confident	Confident	Hesitant	Not Confident	Not Confident	Not Confident	Hesitant	Not Confident	Not Confident	Hesitant	Hesitant	Not Confident	Not Confident	Hesitant	Not Confident	Not Confident	Not Confident	Not Confident	Disagree	Disagree	Strongly Agree	Disagree	Disagree	Disagree	Strongly Disagree	Strongly Disagree	Strongly Disagree	Disagree	Nurse		Prefer not to answer.			10-19 years	36 to 45 years old	College 4 years or more (college graduate)	Suburban	Yes	Prefer not to answer.		Woman
Confident	Hesitant	Not Confident	Not Confident	Not Confident	Hesitant	Hesitant	Hesitant	Hesitant	Hesitant	Hesitant	Not Confident	Not Confident	Not Confident	Not Confident	Not Confident	Not Confident	Not Confident	Hesitant	Not Confident	Hesitant	Hesitant	Hesitant	Disagree	Disagree	Disagree	Agree	Agree	Agree	Disagree	Disagree	Disagree	Agree	Nurse		Other	Medical/Surgical	170	Fewer than 10 years	18 to 25 years old	College 4 years or more (college graduate)	Prefer not to answer.	Yes	White, European American, or European		Woman
Confident	Hesitant	Confident	Hesitant	Hesitant	Confident	Confident	Hesitant	Hesitant	Hesitant	Hesitant	Hesitant	Confident	Hesitant	Confident	Confident	Hesitant	Hesitant	Confident	Hesitant	Confident	Hesitant	Hesitant	Disagree	Disagree	Agree	Disagree	Disagree	Disagree	Disagree	Disagree	Strongly Disagree	Agree	Nurse		Other		178	10-19 years	46 to 55 years old	1 to 3 years after high school (some college, Associate's degree, or technical school)	Suburban	Yes	White, European American, or European		Woman
Hesitant	Hesitant	Hesitant	Not Confident	Hesitant	Confident	Hesitant	Hesitant	Not Confident	Not Confident	Not Confident	Hesitant	Hesitant	Not Confident	Hesitant	Hesitant	Hesitant	Not Confident	Confident	Not Confident	Not Confident	Not Confident	Not Confident	Strongly Disagree	Disagree	Strongly Agree	Agree	Agree	Agree	Disagree	Strongly Disagree	Agree	Agree	Physician		Other	Family practice	170	20-29 years	46 to 55 years old	Advanced degree (Master's, Doctorate, etc.)	Rural	Yes	White, European American, or European		Woman
Not Confident	Hesitant	Hesitant	Not Confident	Hesitant	Confident	Confident	Not Confident	Not Confident	Not Confident	Hesitant	Not Confident	Not Confident	Not Confident	Not Confident	Not Confident	Not Confident	Not Confident	Hesitant	Hesitant	Not Confident	Not Confident	Not Confident	Disagree	Disagree	Agree	Agree	Agree	Agree	Strongly Disagree	Strongly Disagree	Strongly Disagree	Strongly Agree	Nurse		Emergency		185	10-19 years	46 to 55 years old	1 to 3 years after high school (some college, Associate's degree, or technical school)	Rural	Yes	White, European American, or European		Woman
Not Confident	Not Confident	Not Confident	Confident	Confident	Confident	Confident	Hesitant	Not Confident	Not Confident	Not Confident	Hesitant	Hesitant	Hesitant	Hesitant	Hesitant	Not Confident	Not Confident	Not Confident	Hesitant	Hesitant	Confident	Hesitant	Strongly Disagree	Disagree	Agree	Agree	Agree	Agree	Disagree	Strongly Disagree	Strongly Disagree	Strongly Disagree	Nurse		Other		178	10-19 years	26 to 35 years old	1 to 3 years after high school (some college, Associate's degree, or technical school)	Rural	Yes	White, European American, or European		Woman
Confident	Confident	Hesitant	Hesitant	Confident	Confident	Hesitant	Hesitant	Hesitant	Hesitant	Not Confident	Not Confident	Not Confident	Not Confident	Not Confident	Not Confident	Not Confident	Hesitant	Not Confident	Not Confident	Not Confident	Hesitant	Hesitant	Disagree	Agree	Agree	Agree	Agree	Agree	Strongly Disagree	Strongly Disagree	Strongly Disagree	Strongly Agree	Nurse		Other	PACU	178	10-19 years	36 to 45 years old	1 to 3 years after high school (some college, Associate's degree, or technical school)	Rural	Yes	White, European American, or European		Woman
Confident	Confident	Confident	Very Confident	Very Confident	Very Confident	Very Confident	Confident	Confident	Confident	Confident	Very Confident	Confident	Confident	Hesitant	Confident	Confident	Confident	Confident	Confident	Confident	Confident	Confident	Disagree	Strongly Disagree	Agree	Agree	Agree	Agree	Disagree	Agree	Agree	Agree	Physician		Emergency		170	20-29 years	46 to 55 years old	Advanced degree (Master's, Doctorate, etc.)	Suburban	Yes	White, European American, or European		Man
Hesitant	Hesitant	Hesitant	Not Confident	Very Confident	Hesitant	Hesitant	Hesitant	Hesitant	Hesitant	Hesitant	Hesitant	Hesitant	Hesitant	Hesitant	Hesitant	Hesitant	Hesitant	Very Confident	Hesitant	Hesitant	Hesitant	Hesitant	Disagree	Disagree	Agree	Agree	Agree	Agree	Disagree	Disagree	Strongly Disagree	Agree	Nurse		OB/GYN		178	20-29 years	56 to 65 years old	College 4 years or more (college graduate)	Rural	Yes	White, European American, or European		Woman
Confident	Hesitant	Hesitant	Not Confident	Hesitant	Hesitant	Hesitant	Hesitant	Hesitant	Hesitant	Hesitant	Not Confident	Not Confident	Not Confident	Not Confident	Not Confident	Not Confident	Hesitant	Confident	Hesitant	Hesitant	Hesitant	Confident	Strongly Disagree	Strongly Disagree	Agree	Agree	Agree	Agree	Strongly Disagree	Strongly Disagree	Strongly Disagree	Strongly Agree	Nurse		Other	REDACTED Hem/Onc	178	Fewer than 10 years	26 to 35 years old	College 4 years or more (college graduate)	Rural	Yes	White, European American, or European		Woman
Very Confident	Hesitant	Not Confident	Not Confident	Very Confident	Very Confident	Not Confident	Not Confident	Not Confident	Not Confident	Not Confident	Not Confident	Not Confident	Not Confident	Not Confident	Not Confident	Not Confident	Not Confident	Very Confident	Not Confident	Confident	Hesitant	Hesitant	Disagree	Disagree	Agree	Agree	Agree	Agree	Disagree	Disagree	Disagree	Strongly Agree	Nurse		Other	NICU	178	10-19 years	56 to 65 years old	1 to 3 years after high school (some college, Associate's degree, or technical school)	Rural	Yes	White, European American, or European		Woman
Not Confident	Not Confident	Not Confident	Not Confident	Not Confident	Not Confident	Not Confident	Not Confident	Not Confident	Not Confident	Not Confident	Not Confident	Not Confident	Not Confident	Not Confident	Not Confident	Not Confident	Not Confident	Hesitant	Not Confident	Not Confident	Not Confident	Not Confident	Strongly Disagree	Disagree	Agree	Agree	Agree	Strongly Disagree	Strongly Disagree	Strongly Disagree	Strongly Disagree	Agree	Nurse		Other	Cancer Center	185	30 years or more	56 to 65 years old	Advanced degree (Master's, Doctorate, etc.)	Urban	Yes	White, European American, or European		Woman
Confident	Confident	Hesitant	Hesitant	Hesitant	Confident	Confident	Hesitant	Hesitant	Hesitant	Confident	Hesitant	Hesitant	Hesitant	Hesitant	Hesitant	Hesitant	Hesitant	Confident	Hesitant	Hesitant	Hesitant	Hesitant	Disagree	Disagree	Agree	Agree	Strongly Disagree	Agree	Disagree	Disagree	Disagree	Strongly Agree	Nurse		Other	med/surg telemetry	178	Fewer than 10 years	18 to 25 years old	College 4 years or more (college graduate)	Rural	Yes	White, European American, or European		Woman
Confident	Hesitant	Hesitant	Hesitant	Confident	Confident	Confident	Hesitant	Not Confident	Hesitant	Confident	Not Confident	Not Confident	Confident		Confident	Not Confident	Hesitant	Confident	Not Confident		Not Confident	Hesitant	Strongly Disagree	Strongly Disagree	Agree	Agree	Strongly Disagree	Agree	Strongly Disagree	Strongly Disagree	Strongly Disagree	Agree	Nurse		Other	CPSL Primary Care	178	20-29 years	46 to 55 years old	College 4 years or more (college graduate)	Rural	Yes	White, European American, or European		Woman
Confident	Hesitant	Hesitant	Confident	Confident	Confident	Confident	Hesitant	Hesitant	Not Confident	Confident	Hesitant	Hesitant	Hesitant	Hesitant		Hesitant	Hesitant	Confident	Hesitant	Hesitant	Hesitant	Confident	Disagree	Disagree	Agree	Agree	Disagree	Disagree	Disagree	Disagree	Disagree	Strongly Agree	Nurse		Other	Med Surg	170	Fewer than 10 years	36 to 45 years old	College 4 years or more (college graduate)	Suburban	Yes	White, European American, or European		Woman
Confident	Confident	Not Confident	Not Confident	Not Confident	Confident	Confident	Not Confident	Not Confident	Not Confident	Not Confident	Not Confident	Not Confident	Not Confident	Not Confident	Not Confident	Not Confident	Not Confident	Not Confident	Not Confident	Not Confident	Not Confident	Not Confident	Strongly Disagree	Agree	Agree	Agree	Agree	Strongly Disagree	Strongly Disagree	Strongly Disagree	Strongly Disagree	Strongly Disagree	Nurse		Other	or	185	10-19 years	46 to 55 years old	1 to 3 years after high school (some college, Associate's degree, or technical school)	Urban	Yes	White, European American, or European		Woman
Confident	Confident	Confident	Confident	Very Confident	Hesitant	Confident	Hesitant	Hesitant	Hesitant	Hesitant	Not Confident	Not Confident	Not Confident	Not Confident	Not Confident	Not Confident	Hesitant	Confident	Confident	Confident	Confident	Confident	Disagree	Disagree	Agree	Agree	Agree	Agree	Disagree	Disagree	Disagree	Agree	Nurse		Other	Life Flight	178	10-19 years	26 to 35 years old	1 to 3 years after high school (some college, Associate's degree, or technical school)	Rural	Yes	White, European American, or European		Man
Confident	Confident	Hesitant	Hesitant	Hesitant	Confident	Confident	Hesitant	Hesitant	Hesitant	Hesitant	Not Confident	Not Confident	Not Confident	Not Confident	Not Confident	Not Confident	Not Confident	Hesitant	Not Confident	Not Confident	Not Confident	Not Confident	Disagree	Disagree	Agree	Agree	Agree	Agree	Strongly Disagree	Disagree	Strongly Disagree	Strongly Agree	Nurse		Other	ICU	178	20-29 years	46 to 55 years old	1 to 3 years after high school (some college, Associate's degree, or technical school)	Rural	Yes	None of these fully describe me.		Woman
Confident	Hesitant	Hesitant	Hesitant	Hesitant	Confident	Confident	Hesitant	Very Confident	Very Confident	Very Confident	Confident	Confident	Confident	Confident	Confident	Confident	Hesitant	Confident	Confident	Confident	Confident	Confident	Disagree	Disagree	Agree	Agree	Agree	Agree	Disagree	Disagree	Disagree	Strongly Agree	Nurse		OB/GYN		186	Fewer than 10 years	26 to 35 years old	Advanced degree (Master's, Doctorate, etc.)	Rural	Yes	None of these fully describe me.		Woman
Very Confident	Very Confident	Confident	Confident	Confident	Confident	Confident	Hesitant	Hesitant	Not Confident	Hesitant	Not Confident	Not Confident	Not Confident	Not Confident	Not Confident	Not Confident	Hesitant	Confident	Confident	Confident	Hesitant	Confident	Disagree	Strongly Disagree	Strongly Agree	Agree	Agree	Agree	Disagree	Disagree	Strongly Agree	Agree	Nurse		Pediatrics		170	Fewer than 10 years	26 to 35 years old	College 4 years or more (college graduate)	Rural	Yes	White, European American, or European		Woman
Confident	Hesitant	Not Confident	Hesitant	Hesitant	Hesitant	Hesitant	Hesitant	Hesitant	Hesitant	Hesitant	Not Confident	Not Confident	Not Confident	Not Confident	Hesitant	Not Confident	Not Confident	Not Confident	Hesitant	Hesitant	Not Confident	Hesitant	Disagree	Disagree	Agree	Agree	Agree	Agree	Disagree	Strongly Disagree	Agree	Agree	Physician		Pediatrics		186	Fewer than 10 years	26 to 35 years old	Advanced degree (Master's, Doctorate, etc.)	Rural	Yes	White, European American, or European		Woman
Hesitant	Not Confident	Not Confident	Not Confident	Hesitant	Confident	Confident	Not Confident	Not Confident	Not Confident	Hesitant	Not Confident	Not Confident	Not Confident	Not Confident	Not Confident	Not Confident	Not Confident	Not Confident	Not Confident	Not Confident	Not Confident	Not Confident	Disagree	Disagree	Disagree	Disagree	Agree	Disagree	Disagree	Strongly Disagree	Strongly Disagree	Agree	Nurse		Other	icu		Fewer than 10 years	26 to 35 years old	College 4 years or more (college graduate)	Rural	Yes	White, European American, or European		Woman
Confident	Confident	Hesitant	Hesitant	Hesitant	Confident	Confident	Confident	Confident	Hesitant	Confident	Not Confident	Not Confident	Not Confident	Not Confident	Not Confident	Not Confident	Hesitant	Confident	Confident	Hesitant	Hesitant	Confident	Strongly Disagree	Strongly Disagree	Agree	Disagree	Agree	Agree	Disagree	Strongly Agree	Strongly Agree	Strongly Agree	Nurse		Emergency			10-19 years	26 to 35 years old	College 4 years or more (college graduate)	Rural	Yes	White, European American, or European		Woman
Confident	Confident	Confident	Hesitant	Confident	Confident	Confident	Confident	Confident	Hesitant	Confident	Hesitant	Hesitant	Hesitant	Confident	Confident	Hesitant	Confident	Confident	Confident	Hesitant	Hesitant	Confident	Disagree	Strongly Disagree	Agree	Agree	Agree	Agree	Disagree	Strongly Disagree	Strongly Agree	Agree	Other	Orthodontist	Other	Dentistry	168	10-19 years	36 to 45 years old	Advanced degree (Master's, Doctorate, etc.)	Suburban	Yes	White, European American, or European		Man
Not Confident	Not Confident	Not Confident	Not Confident	Hesitant	Confident	Confident	Not Confident	Not Confident	Not Confident	Not Confident	Not Confident	Not Confident	Not Confident	Not Confident	Not Confident	Not Confident	Not Confident	Not Confident	Not Confident	Not Confident	Not Confident	Not Confident	Strongly Disagree	Agree	Strongly Agree	Agree	Agree	Agree	Strongly Disagree	Strongly Disagree	Strongly Disagree	Strongly Agree	Physician		OB/GYN		168	30 years or more	56 to 65 years old	Advanced degree (Master's, Doctorate, etc.)	Rural	Yes	White, European American, or European		Man
Not Confident	Not Confident	Not Confident	Not Confident	Not Confident	Hesitant	Hesitant	Not Confident	Not Confident	Not Confident	Not Confident	Not Confident	Not Confident	Not Confident	Not Confident	Not Confident	Not Confident	Hesitant	Hesitant	Hesitant	Not Confident	Not Confident	Not Confident	Agree	Disagree	Agree	Agree	Agree	Agree	Disagree	Disagree	Disagree	Agree	Other	dentist	Other	dentistry	138	Fewer than 10 years	26 to 35 years old	Advanced degree (Master's, Doctorate, etc.)	Rural	Yes	White, European American, or European		Woman
Confident	Confident	Confident	Hesitant	Confident	Confident	Confident	Hesitant	Hesitant	Not Confident	Not Confident	Not Confident	Not Confident	Not Confident	Not Confident	Not Confident	Not Confident	Not Confident	Not Confident	Not Confident	Not Confident	Not Confident	Not Confident	Strongly Disagree	Strongly Disagree	Strongly Agree	Strongly Agree	Agree	Agree	Strongly Disagree	Strongly Disagree	Strongly Agree	Strongly Agree	Nurse		Other	primary care	170	30 years or more	56 to 65 years old	Advanced degree (Master's, Doctorate, etc.)	Suburban	Yes	White, European American, or European		Woman
Confident	Confident	Hesitant	Not Confident	Not Confident	Hesitant	Confident	Hesitant	Hesitant	Hesitant	Hesitant	Hesitant	Hesitant	Hesitant	Hesitant	Hesitant		Hesitant	Hesitant	Hesitant	Hesitant	Hesitant	Hesitant	Disagree	Disagree	Agree	Agree	Disagree	Disagree	Disagree	Disagree	Disagree	Strongly Agree	Nurse		Prefer not to answer.		170	20-29 years	46 to 55 years old	College 4 years or more (college graduate)	Rural	Yes	Prefer not to answer.		Woman
Confident	Confident	Confident	Confident	Confident	Confident	Confident	Confident	Confident	Hesitant	Confident	Hesitant	Hesitant	Hesitant	Hesitant	Hesitant	Hesitant	Confident	Confident	Confident	Confident	Hesitant	Hesitant	Disagree	Disagree	Agree	Agree	Agree	Agree	Agree	Disagree	Strongly Agree	Agree	Nurse		Other	perianesthesia	170	30 years or more	56 to 65 years old	1 to 3 years after high school (some college, Associate's degree, or technical school)	Suburban	Yes	White, European American, or European		Woman
Confident	Confident	Confident	Confident	Confident	Confident	Confident	Confident	Confident	Confident	Confident	Confident	Confident	Confident	Confident	Confident	Confident	Hesitant	Confident	Confident	Confident	Confident	Confident	Strongly Disagree	Strongly Disagree	Strongly Agree	Disagree	Disagree	Disagree	Agree	Strongly Agree	Agree	Agree	Nurse		Other	HSHS Medical Outreach	171	Fewer than 10 years	46 to 55 years old	College 4 years or more (college graduate)	Suburban	Yes	White, European American, or European		Woman
Very Confident	Very Confident	Very Confident	Hesitant	Confident	Very Confident	Very Confident	Hesitant	Hesitant	Confident	Confident	Confident	Confident	Hesitant	Confident	Confident	Very Confident	Hesitant	Very Confident	Confident	Very Confident	Very Confident	Confident	Disagree	Disagree	Strongly Agree	Agree	Agree	Agree	Disagree	Disagree	Disagree	Agree	Nurse		Other	AICU	178	Fewer than 10 years	26 to 35 years old	College 4 years or more (college graduate)	Rural	Yes	White, European American, or European		Woman
Confident	Confident	Not Confident	Not Confident	Not Confident	Not Confident	Not Confident	Not Confident	Not Confident	Not Confident	Not Confident	Not Confident	Not Confident	Not Confident	Not Confident	Not Confident	Not Confident	Not Confident	Not Confident	Not Confident	Not Confident	Not Confident	Not Confident	Disagree	Disagree	Agree	Agree	Disagree	Agree	Strongly Disagree	Strongly Disagree	Strongly Disagree	Agree	Nurse			Med/Surg	185	20-29 years	46 to 55 years old	College 4 years or more (college graduate)	Rural	Yes	White, European American, or European		Woman
Not Confident	Not Confident	Confident	Not Confident	Not Confident	Not Confident	Not Confident	Not Confident	Not Confident	Not Confident	Not Confident	Not Confident	Not Confident	Not Confident	Not Confident	Not Confident	Not Confident	Not Confident	Not Confident	Not Confident	Not Confident	Not Confident	Not Confident	Strongly Disagree	Strongly Disagree	Strongly Disagree	Agree	Agree	Agree	Strongly Disagree	Strongly Disagree	Strongly Disagree	Strongly Agree	Nurse		Emergency		178	Fewer than 10 years	26 to 35 years old	College 4 years or more (college graduate)	Suburban	Yes	White, European American, or European		Man
Hesitant	Hesitant	Not Confident	Not Confident	Confident	Hesitant	Confident	Not Confident	Not Confident	Hesitant	Not Confident	Not Confident	Not Confident	Not Confident	Not Confident	Not Confident	Not Confident	Not Confident	Not Confident	Not Confident	Not Confident	Not Confident	Not Confident	Strongly Disagree	Disagree	Strongly Agree	Strongly Agree	Agree	Agree	Strongly Disagree	Strongly Disagree	Strongly Disagree	Agree	Nurse		Other		178	30 years or more	56 to 65 years old	1 to 3 years after high school (some college, Associate's degree, or technical school)	Rural	Yes	White, European American, or European		Woman
Confident	Hesitant	Hesitant	Hesitant	Hesitant	Confident	Confident	Hesitant	Hesitant	Confident	Hesitant	Hesitant	Hesitant	Hesitant	Hesitant	Confident	Hesitant	Hesitant	Very Confident	Hesitant	Confident	Confident	Hesitant	Disagree	Disagree	Agree				Disagree	Disagree	Agree	Agree	Nurse		Emergency		178	30 years or more	56 to 65 years old	1 to 3 years after high school (some college, Associate's degree, or technical school)	Rural	Yes	White, European American, or European		Woman
Confident	Hesitant	Hesitant	Hesitant	Not Confident	Hesitant	Confident	Hesitant	Hesitant	Not Confident	Confident	Not Confident	Not Confident	Not Confident	Not Confident	Not Confident	Not Confident	Not Confident	Not Confident	Not Confident	Not Confident	Confident	Not Confident	Strongly Disagree	Disagree	Strongly Agree	Agree	Agree	Agree	Strongly Disagree	Strongly Disagree	Strongly Disagree	Agree	Nurse		Psychiatry		170	Fewer than 10 years	26 to 35 years old	College 4 years or more (college graduate)	Rural	Yes	Hispanic, Latino, or Spanish		Woman
Confident	Confident	Confident	Hesitant	Hesitant	Confident	Confident	Hesitant	Hesitant	Hesitant	Hesitant	Hesitant	Hesitant	Hesitant	Hesitant	Hesitant	Hesitant	Hesitant	Hesitant	Hesitant	Hesitant	Hesitant	Hesitant	Disagree	Agree	Agree	Agree	Agree	Agree	Disagree	Disagree	Disagree	Agree	Nurse		Other		170	30 years or more	46 to 55 years old	1 to 3 years after high school (some college, Associate's degree, or technical school)	Rural	Yes	White, European American, or European		Woman
Hesitant	Hesitant	Hesitant	Not Confident	Hesitant	Hesitant	Hesitant	Hesitant	Hesitant	Hesitant	Hesitant	Hesitant	Hesitant	Hesitant	Hesitant	Hesitant	Hesitant	Hesitant	Hesitant	Hesitant	Hesitant	Hesitant	Hesitant	Agree	Agree	Agree	Disagree	Agree	Disagree	Strongly Disagree	Strongly Disagree	Strongly Disagree	Agree	Nurse		Emergency		178	Fewer than 10 years	26 to 35 years old	College 4 years or more (college graduate)	Rural	Yes	White, European American, or European		Woman
Not Confident	Not Confident	Not Confident	Not Confident	Confident	Hesitant	Confident	Not Confident	Not Confident	Not Confident	Not Confident	Not Confident	Not Confident	Not Confident	Not Confident	Not Confident	Not Confident	Not Confident	Not Confident	Not Confident	Not Confident	Not Confident	Not Confident	Disagree	Disagree	Agree	Agree	Strongly Disagree	Strongly Disagree		Strongly Disagree	Strongly Disagree		Nurse		Pediatrics		178	10-19 years	26 to 35 years old	Advanced degree (Master's, Doctorate, etc.)	Rural	Yes	White, European American, or European		Woman
Confident	Hesitant	Hesitant	Hesitant	Confident	Confident	Confident	Hesitant	Hesitant	Hesitant	Hesitant	Hesitant	Hesitant	Hesitant	Hesitant	Hesitant	Hesitant	Hesitant	Confident	Confident	Confident	Confident	Confident	Disagree	Disagree	Disagree	Agree	Agree	Agree	Strongly Disagree	Agree	Strongly Disagree	Agree	Nurse		Emergency			Fewer than 10 years	36 to 45 years old	Advanced degree (Master's, Doctorate, etc.)	Rural	Yes	White, European American, or European		Woman
Confident	Confident	Hesitant	Not Confident	Not Confident	Confident	Confident	Hesitant	Hesitant	Not Confident	Not Confident	Hesitant	Hesitant	Hesitant	Hesitant	Confident	Hesitant	Not Confident	Hesitant	Not Confident	Hesitant	Hesitant	Hesitant	Disagree	Disagree	Agree	Agree	Disagree	Agree	Disagree	Disagree	Strongly Disagree	Agree	Nurse		Other	icu	170	20-29 years	56 to 65 years old	College 4 years or more (college graduate)	Rural	Yes	White, European American, or European		Woman
Very Confident	Confident	Hesitant	Confident	Very Confident	Very Confident		Confident	Hesitant	Very Confident	Confident	Confident	Hesitant	Hesitant	Hesitant	Confident	Confident	Hesitant	Very Confident	Confident	Confident	Confident	Confident	Disagree	Disagree	Agree	Agree	Disagree	Disagree	Disagree	Strongly Disagree	Strongly Disagree	Agree	Nurse			Health Management	178	30 years or more	46 to 55 years old	Advanced degree (Master's, Doctorate, etc.)	Rural	Yes	White, European American, or European		Woman
Hesitant	Hesitant	Hesitant	Hesitant	Hesitant	Confident	Confident	Hesitant	Hesitant	Confident	Confident	Hesitant	Hesitant	Hesitant	Hesitant	Hesitant	Hesitant	Hesitant	Hesitant	Hesitant	Hesitant	Hesitant	Hesitant	Strongly Disagree	Agree	Agree	Agree	Agree	Agree	Strongly Disagree	Strongly Disagree	Strongly Disagree	Agree	Nurse		Emergency		170	Fewer than 10 years	36 to 45 years old	College 4 years or more (college graduate)	Rural	Yes	White, European American, or European		Woman
Confident	Hesitant	Not Confident	Not Confident	Not Confident	Not Confident	Hesitant	Not Confident	Not Confident	Not Confident	Not Confident	Not Confident	Not Confident	Not Confident	Not Confident	Not Confident	Not Confident	Not Confident	Confident	Hesitant	Hesitant	Not Confident	Hesitant	Strongly Disagree	Disagree	Agree				Disagree	Disagree	Disagree	Agree	Nurse		Emergency		170	Fewer than 10 years	26 to 35 years old	Advanced degree (Master's, Doctorate, etc.)	Suburban	Yes	White, European American, or European		Woman
Confident	Confident	Confident	Not Confident	Hesitant	Confident	Confident	Confident	Hesitant	Not Confident	Not Confident	Not Confident	Not Confident	Not Confident	Not Confident	Not Confident	Not Confident	Not Confident	Hesitant	Not Confident	Hesitant	Not Confident	Hesitant	Agree	Disagree	Agree	Disagree	Agree	Agree	Disagree	Strongly Disagree	Agree	Agree	Physician		Other	Surgery	187	20-29 years	46 to 55 years old	Advanced degree (Master's, Doctorate, etc.)	Urban	Yes	White, European American, or European		Man
Confident	Hesitant	Hesitant	Hesitant	Confident	Confident	Confident	Hesitant	Hesitant	Hesitant	Confident	Hesitant	Hesitant	Hesitant	Hesitant	Confident	Hesitant	Hesitant	Confident	Hesitant	Hesitant	Hesitant	Hesitant	Agree	Agree	Agree	Agree	Agree	Disagree	Disagree	Disagree	Disagree	Agree	Nurse		Other	critical care	187	30 years or more	56 to 65 years old	Prefer not to answer.	Suburban	Yes	White, European American, or European		Woman
Confident	Confident	Confident	Very Confident	Very Confident	Confident	Confident	Hesitant	Hesitant	Not Confident	Not Confident	Not Confident	Not Confident	Not Confident	Not Confident		Not Confident	Not Confident	Not Confident	Not Confident	Not Confident	Not Confident	Hesitant	Agree	Strongly Disagree	Disagree	Agree	Disagree	Agree	Disagree	Strongly Disagree	Agree	Agree	Nurse		Other	telemetry	178	Fewer than 10 years	26 to 35 years old	College 4 years or more (college graduate)	Suburban	Yes	White, European American, or European		Woman
Hesitant	Hesitant	Confident	Very Confident	Very Confident	Very Confident	Very Confident	Hesitant	Not Confident	Not Confident	Not Confident	Not Confident	Not Confident	Not Confident	Not Confident	Not Confident	Not Confident	Not Confident	Very Confident	Very Confident	Not Confident	Not Confident	Hesitant	Strongly Disagree	Strongly Disagree	Agree	Agree	Agree	Agree	Strongly Disagree	Strongly Disagree	Agree	Strongly Agree	Nurse		Other	Adult intensive care/ trauma/ surgical icu	170	10-19 years	36 to 45 years old	College 4 years or more (college graduate)	Suburban	Yes	White, European American, or European		Woman
Hesitant	Not Confident	Hesitant	Not Confident	Hesitant	Hesitant	Hesitant	Not Confident	Not Confident	Hesitant	Not Confident	Not Confident	Not Confident	Not Confident	Not Confident	Not Confident	Not Confident	Not Confident	Hesitant	Hesitant	Not Confident	Hesitant	Hesitant	Agree	Disagree	Agree	Agree	Strongly Disagree	Strongly Disagree	Disagree	Strongly Disagree	Strongly Disagree	Disagree	Nurse		Other	Aicu		Fewer than 10 years	26 to 35 years old	College 4 years or more (college graduate)	Rural	Yes	White, European American, or European		Woman
Not Confident	Not Confident	Not Confident	Not Confident	Not Confident	Hesitant	Hesitant	Hesitant	Hesitant	Confident	Confident	Not Confident	Not Confident	Not Confident	Not Confident	Not Confident	Not Confident	Not Confident	Very Confident	Hesitant	Confident	Very Confident	Hesitant	Disagree	Disagree	Agree	Agree	Disagree	Disagree	Disagree	Strongly Disagree	Strongly Disagree	Agree	Nurse		Other		179	20-29 years	36 to 45 years old	College 4 years or more (college graduate)	Rural	Yes	White, European American, or European		Woman
Confident	Hesitant	Hesitant	Not Confident	Hesitant	Not Confident	Not Confident	Not Confident	Not Confident	Not Confident	Hesitant	Not Confident	Not Confident	Not Confident	Not Confident	Not Confident	Not Confident	Not Confident	Not Confident	Not Confident	Not Confident	Not Confident	Not Confident	Disagree	Disagree	Agree	Agree	Agree	Agree	Disagree	Strongly Disagree	Strongly Disagree	Agree	Nurse		OB/GYN		170	Fewer than 10 years	26 to 35 years old	College 4 years or more (college graduate)	Rural	Yes	White, European American, or European		Woman
Hesitant	Hesitant	Hesitant	Hesitant	Confident	Confident	Confident	Hesitant	Hesitant	Confident	Hesitant	Hesitant	Hesitant	Hesitant	Hesitant	Hesitant	Confident	Hesitant	Confident	Confident	Confident	Confident	Hesitant	Disagree	Disagree	Agree	Agree	Agree	Agree	Disagree	Disagree	Disagree	Agree	Nurse		Emergency		178	Fewer than 10 years	26 to 35 years old	College 4 years or more (college graduate)	Rural	Yes	White, European American, or European		Woman
Confident	Confident	Hesitant	Hesitant	Hesitant	Confident	Confident	Hesitant	Hesitant	Hesitant	Hesitant	Not Confident	Not Confident	Not Confident	Not Confident	Not Confident	Not Confident	Hesitant	Confident	Hesitant	Confident	Hesitant	Hesitant	Disagree	Disagree	Agree	Agree	Agree	Agree	Disagree	Agree	Strongly Disagree	Agree	Nurse		Emergency		178	20-29 years	46 to 55 years old	College 4 years or more (college graduate)	Rural	Yes	White, European American, or European		Woman
Confident	Hesitant	Hesitant	Hesitant	Hesitant	Hesitant	Hesitant	Hesitant	Hesitant	Hesitant	Hesitant	Not Confident	Not Confident	Not Confident	Not Confident	Not Confident	Not Confident	Not Confident	Hesitant	Hesitant	Confident	Hesitant	Hesitant	Disagree	Disagree	Agree	Agree	Disagree	Disagree	Disagree	Disagree	Disagree	Agree	Nurse		Other	drug and alcohol rehab	184	10-19 years	46 to 55 years old	1 to 3 years after high school (some college, Associate's degree, or technical school)	Rural	Yes	White, European American, or European		Man
Very Confident	Very Confident	Very Confident	Hesitant	Confident	Confident	Not Confident	Hesitant	Not Confident	Not Confident	Not Confident	Not Confident	Not Confident	Not Confident	Not Confident	Not Confident	Not Confident	Not Confident	Confident	Not Confident	Not Confident	Not Confident	Not Confident	Strongly Disagree	Agree	Agree	Agree	Disagree	Agree	Strongly Disagree	Strongly Disagree	Strongly Disagree	Agree	Nurse		Other		184	Fewer than 10 years	26 to 35 years old	College 4 years or more (college graduate)	Suburban	Yes	White, European American, or European		Woman
Confident	Confident	Hesitant	Hesitant	Hesitant	Confident	Confident	Hesitant	Hesitant	Hesitant	Hesitant	Not Confident	Not Confident	Not Confident	Not Confident	Not Confident	Not Confident	Not Confident	Confident	Not Confident	Hesitant	Hesitant	Not Confident	Strongly Disagree	Strongly Disagree	Strongly Agree	Strongly Agree	Strongly Agree	Strongly Agree	Disagree	Strongly Disagree	Disagree	Agree	Nurse		Other	med/surg	170	Fewer than 10 years	26 to 35 years old	College 4 years or more (college graduate)	Rural	Yes	White, European American, or European		Woman
Confident	Confident	Hesitant	Hesitant		Confident	Confident	Hesitant	Hesitant	Not Confident	Not Confident	Hesitant	Hesitant	Hesitant	Hesitant	Hesitant	Hesitant	Hesitant	Hesitant	Not Confident	Hesitant	Hesitant	Hesitant
Hesitant	Not Confident	Hesitant	Not Confident	Hesitant	Not Confident	Not Confident	Hesitant	Hesitant	Not Confident	Hesitant	Not Confident	Not Confident	Not Confident	Not Confident	Not Confident	Not Confident	Not Confident	Hesitant	Hesitant	Not Confident	Not Confident	Not Confident	Disagree	Disagree	Agree	Agree	Disagree	Disagree	Disagree	Strongly Disagree	Strongly Disagree	Strongly Agree	Nurse		Other	hem/onc		10-19 years	26 to 35 years old	College 4 years or more (college graduate)	Rural	Yes	White, European American, or European		Woman
Hesitant	Hesitant	Hesitant	Hesitant	Hesitant	Hesitant	Hesitant	Hesitant	Hesitant	Not Confident	Not Confident	Not Confident	Not Confident	Not Confident	Not Confident	Not Confident	Not Confident	Not Confident	Hesitant	Not Confident		Not Confident	Hesitant	Strongly Disagree	Strongly Disagree	Agree	Agree	Agree	Agree	Strongly Disagree	Disagree	Disagree	Agree	Nurse		Other	NICU-neonates	178	Fewer than 10 years	26 to 35 years old	College 4 years or more (college graduate)	Rural	Yes	White, European American, or European		Woman
Confident	Confident	Confident	Hesitant	Confident	Very Confident	Very Confident	Confident	Hesitant	Hesitant	Hesitant	Hesitant	Hesitant	Hesitant	Hesitant	Hesitant	Hesitant	Hesitant	Not Confident	Not Confident	Not Confident	Not Confident	Hesitant	Disagree	Disagree	Strongly Agree	Agree	Agree	Disagree	Strongly Disagree	Disagree	Agree	Strongly Agree	Nurse		Psychiatry		170	10-19 years	36 to 45 years old	College 4 years or more (college graduate)	Suburban	Yes	White, European American, or European		Woman
Confident	Hesitant	Hesitant	Hesitant	Confident	Confident	Hesitant	Not Confident	Not Confident	Not Confident	Hesitant	Not Confident	Not Confident	Not Confident	Not Confident	Not Confident	Not Confident	Hesitant	Very Confident	Hesitant	Hesitant	Not Confident	Hesitant	Strongly Disagree	Disagree	Strongly Agree	Agree	Agree	Disagree	Disagree	Disagree	Disagree	Strongly Agree	Nurse		Other			10-19 years	36 to 45 years old	College 4 years or more (college graduate)	Rural	Yes	Prefer not to answer.		Woman
Confident	Confident	Confident	Hesitant	Hesitant	Confident	Confident	Hesitant	Hesitant	Hesitant	Hesitant	Not Confident	Not Confident	Not Confident	Not Confident	Not Confident	Not Confident	Not Confident	Not Confident	Not Confident	Not Confident	Not Confident	Not Confident	Strongly Disagree	Disagree	Agree	Agree	Agree	Agree	Disagree	Strongly Disagree	Strongly Disagree	Agree	Nurse		Other	diagnostic services	170	30 years or more	56 to 65 years old	1 to 3 years after high school (some college, Associate's degree, or technical school)	Rural	Yes	White, European American, or European		Woman
Hesitant	Hesitant	Hesitant	Hesitant	Hesitant	Hesitant	Hesitant	Hesitant	Hesitant	Hesitant	Hesitant	Not Confident	Not Confident	Not Confident	Not Confident	Not Confident	Not Confident	Not Confident	Hesitant	Not Confident	Hesitant	Confident	Hesitant	Disagree	Disagree	Agree	Agree	Disagree	Disagree	Disagree	Disagree	Agree	Agree	Nurse		Other	education		10-19 years	26 to 35 years old	Advanced degree (Master's, Doctorate, etc.)	Suburban	Yes	White, European American, or European		Woman
Very Confident	Confident	Hesitant	Hesitant	Hesitant	Confident	Confident	Confident	Confident	Hesitant	Hesitant	Not Confident	Not Confident	Not Confident	Not Confident	Not Confident	Not Confident	Confident	Confident	Hesitant	Hesitant	Confident	Hesitant	Disagree	Disagree	Agree	Agree	Agree	Disagree	Strongly Disagree	Strongly Disagree	Agree	Strongly Agree	Nurse			SCU	178	Fewer than 10 years	36 to 45 years old	College 4 years or more (college graduate)	Suburban	Yes	White, European American, or European		Woman
Hesitant	Hesitant	Hesitant	Hesitant	Hesitant	Hesitant	Hesitant	Hesitant	Hesitant	Hesitant	Hesitant	Hesitant	Hesitant	Hesitant	Hesitant	Hesitant	Hesitant	Hesitant	Hesitant	Hesitant	Hesitant	Hesitant	Hesitant	Disagree	Disagree	Agree	Agree	Agree	Agree	Disagree	Disagree	Disagree	Agree	Nurse		Other	Home Health and Hospice	178	20-29 years	46 to 55 years old	1 to 3 years after high school (some college, Associate's degree, or technical school)	Rural	Yes	White, European American, or European		Woman
Confident	Hesitant	Hesitant	Hesitant	Confident	Hesitant	Hesitant	Hesitant	Hesitant	Hesitant	Hesitant	Hesitant	Hesitant	Hesitant	Hesitant	Confident	Confident	Hesitant	Hesitant	Hesitant	Hesitant	Hesitant	Hesitant	Disagree	Agree	Agree	Agree	Agree	Agree	Disagree	Disagree	Disagree	Agree	Nurse		Other	Home health	170	30 years or more	56 to 65 years old	1 to 3 years after high school (some college, Associate's degree, or technical school)	Rural	Yes	White, European American, or European		Woman
Confident	Confident	Confident	Confident	Confident	Confident	Confident	Confident	Hesitant	Confident	Confident	Confident	Confident	Confident	Confident	Confident	Confident	Hesitant	Confident	Confident	Hesitant	Hesitant	Hesitant	Disagree	Strongly Disagree	Disagree	Agree	Agree	Agree	Disagree	Disagree	Agree	Agree	Nurse		Other	orthopaedics and trauma	178	Fewer than 10 years	26 to 35 years old	College 4 years or more (college graduate)	Rural	Yes	White, European American, or European		Woman
Confident	Not Confident	Not Confident	Not Confident	Confident	Hesitant	Hesitant	Not Confident	Not Confident	Not Confident	Not Confident	Not Confident	Not Confident	Not Confident	Not Confident	Not Confident	Not Confident	Not Confident	Not Confident	Not Confident	Not Confident	Not Confident	Not Confident	Strongly Disagree	Strongly Disagree	Strongly Agree	Strongly Agree	Strongly Agree	Strongly Agree	Strongly Disagree	Strongly Disagree	Strongly Disagree	Strongly Agree	Physician		Other	primary care office	177	Fewer than 10 years	26 to 35 years old	Advanced degree (Master's, Doctorate, etc.)	Rural	No	Asian		Woman
Hesitant	Hesitant	Not Confident	Not Confident	Not Confident	Not Confident	Not Confident	Not Confident	Not Confident	Not Confident	Not Confident	Not Confident	Not Confident	Not Confident	Not Confident	Not Confident	Not Confident	Not Confident	Not Confident	Not Confident	Not Confident	Not Confident	Not Confident	Disagree	Agree	Agree	Agree	Agree	Agree	Disagree	Disagree	Disagree	Agree	Nurse		Other		178	10-19 years	46 to 55 years old	1 to 3 years after high school (some college, Associate's degree, or technical school)	Rural	Yes	White, European American, or European		Woman
Hesitant	Hesitant	Not Confident	Not Confident	Not Confident	Hesitant	Hesitant	Not Confident	Not Confident	Not Confident	Not Confident	Not Confident	Not Confident	Not Confident	Not Confident	Hesitant	Not Confident	Not Confident	Not Confident	Not Confident	Not Confident	Not Confident	Not Confident	Disagree	Disagree	Agree	Disagree	Disagree	Disagree		Disagree	Strongly Disagree	Agree	Nurse		Prefer not to answer.			Prefer not to answer.	Prefer not to answer.	1 to 3 years after high school (some college, Associate's degree, or technical school)	Rural	Yes	White, European American, or European		Woman
Hesitant	Hesitant	Hesitant	Hesitant	Hesitant	Confident	Confident	Hesitant	Confident	Hesitant	Confident	Hesitant	Hesitant	Hesitant	Hesitant	Hesitant	Hesitant	Hesitant	Confident	Hesitant	Confident	Confident	Hesitant	Disagree	Disagree	Agree	Agree	Disagree	Disagree	Disagree	Disagree	Disagree	Agree	Nurse		Other	neurology	178	Fewer than 10 years	36 to 45 years old	College 4 years or more (college graduate)	Rural	Yes	White, European American, or European		Woman
Hesitant	Hesitant	Hesitant	Not Confident	Not Confident	Not Confident	Not Confident	Not Confident	Not Confident	Not Confident	Hesitant	Not Confident	Not Confident	Not Confident	Not Confident	Not Confident	Not Confident	Not Confident	Hesitant	Not Confident	Not Confident	Hesitant	Not Confident	Disagree	Agree	Agree	Agree	Agree	Agree	Disagree	Strongly Disagree	Strongly Disagree	Agree	Nurse		Other		187	10-19 years	36 to 45 years old	College 4 years or more (college graduate)	Suburban	Yes	White, European American, or European		Woman
Confident	Confident	Confident	Confident	Hesitant	Confident	Hesitant	Confident	Hesitant	Hesitant	Confident	Hesitant	Hesitant	Hesitant	Hesitant	Hesitant	Hesitant	Hesitant	Hesitant	Hesitant		Hesitant	Hesitant	Disagree	Strongly Disagree	Disagree	Disagree	Disagree	Disagree	Disagree	Disagree	Disagree	Disagree	Nurse			PCU	187	Fewer than 10 years	36 to 45 years old	Advanced degree (Master's, Doctorate, etc.)	Suburban	Yes	White, European American, or European		Woman
Hesitant	Hesitant	Hesitant	Not Confident	Hesitant	Confident	Hesitant	Hesitant	Not Confident	Not Confident	Not Confident	Not Confident	Not Confident	Not Confident	Not Confident			Not Confident	Not Confident	Not Confident	Not Confident	Not Confident	Not Confident	Disagree	Agree	Agree	Agree	Agree	Agree	Strongly Disagree	Strongly Disagree	Strongly Disagree	Agree	Nurse		OB/GYN		178	30 years or more	56 to 65 years old	1 to 3 years after high school (some college, Associate's degree, or technical school)	Rural	Yes	White, European American, or European		Woman
Very Confident	Very Confident		Hesitant	Confident	Very Confident	Very Confident	Confident	Hesitant	Not Confident	Confident	Not Confident	Not Confident	Not Confident	Not Confident	Very Confident	Hesitant	Not Confident	Very Confident	Hesitant	Hesitant	Not Confident	Very Confident	Disagree	Strongly Disagree	Strongly Agree	Disagree	Strongly Disagree	Strongly Disagree	Disagree	Disagree	Strongly Agree	Strongly Agree	Nurse		Prefer not to answer.		171	Prefer not to answer.	Prefer not to answer.	College 4 years or more (college graduate)	Rural	Yes	Prefer not to answer.		Woman
Confident	Hesitant	Hesitant	Hesitant	Confident	Confident	Very Confident			Hesitant	Hesitant	Not Confident	Not Confident	Not Confident	Not Confident	Not Confident	Not Confident	Not Confident	Hesitant	Not Confident	Not Confident		Not Confident	Strongly Disagree	Disagree	Strongly Agree	Strongly Agree	Strongly Agree	Strongly Agree	Strongly Disagree	Strongly Disagree	Strongly Disagree	Strongly Agree	Nurse		Psychiatry		178	30 years or more	56 to 65 years old	Advanced degree (Master's, Doctorate, etc.)	Suburban	Yes	White, European American, or European		Woman
Confident	Confident	Confident	Hesitant	Hesitant	Confident	Confident	Hesitant	Hesitant	Not Confident	Hesitant	Not Confident	Not Confident	Not Confident	Not Confident	Not Confident	Not Confident	Not Confident	Not Confident	Not Confident	Not Confident	Not Confident	Hesitant	Disagree	Disagree	Agree	Agree	Disagree	Disagree	Strongly Disagree	Disagree	Strongly Disagree	Agree	Nurse		Other	Med Surg	170	10-19 years	26 to 35 years old	College 4 years or more (college graduate)	Rural	Yes	White, European American, or European		Woman
Hesitant	Not Confident	Not Confident	Not Confident	Hesitant	Hesitant	Confident	Hesitant	Not Confident	Hesitant	Confident	Hesitant	Confident	Hesitant	Hesitant	Hesitant	Hesitant	Hesitant	Hesitant	Hesitant	Hesitant	Hesitant	Hesitant	Disagree	Disagree	Agree	Agree	Disagree	Agree	Strongly Disagree	Strongly Disagree	Strongly Disagree	Agree	Nurse		Emergency		187	Fewer than 10 years	26 to 35 years old	College 4 years or more (college graduate)	Suburban	Yes	White, European American, or European		Woman
Hesitant	Hesitant	Hesitant	Hesitant	Hesitant	Hesitant	Hesitant	Hesitant	Hesitant	Hesitant	Hesitant	Not Confident	Not Confident	Not Confident	Not Confident	Not Confident	Not Confident	Not Confident	Not Confident	Not Confident	Hesitant	Hesitant	Hesitant	Disagree	Disagree	Agree	Disagree	Disagree	Agree	Disagree	Strongly Disagree	Disagree	Agree	Nurse		OB/GYN		170	10-19 years	36 to 45 years old	College 4 years or more (college graduate)	Suburban	Yes	White, European American, or European		Woman
Hesitant	Not Confident	Hesitant	Not Confident	Not Confident	Hesitant	Hesitant	Hesitant	Not Confident	Not Confident	Hesitant	Not Confident	Not Confident	Not Confident	Not Confident	Not Confident	Not Confident	Not Confident	Confident	Not Confident	Hesitant	Not Confident	Confident	Disagree	Disagree	Agree	Agree	Agree	Agree	Strongly Disagree	Disagree	Strongly Disagree	Agree	Nurse		Emergency		187	10-19 years	46 to 55 years old	College 4 years or more (college graduate)	Rural	Yes	White, European American, or European		Woman
Confident	Hesitant	Hesitant	Not Confident	Not Confident	Confident	Confident	Hesitant	Not Confident	Not Confident	Confident	Hesitant	Hesitant	Hesitant	Hesitant	Hesitant	Hesitant	Not Confident	Confident	Hesitant	Hesitant	Confident	Hesitant	Strongly Disagree	Strongly Disagree	Agree	Agree	Agree	Agree	Strongly Disagree	Disagree	Strongly Disagree	Strongly Agree	Nurse		Other	Telemetry	170	20-29 years	36 to 45 years old	College 4 years or more (college graduate)	Urban	Yes	White, European American, or European		Woman
Not Confident	Not Confident	Not Confident	Not Confident	Hesitant	Hesitant	Hesitant	Not Confident	Not Confident	Not Confident	Not Confident	Not Confident	Not Confident	Not Confident	Not Confident	Not Confident	Hesitant	Not Confident	Not Confident	Not Confident	Not Confident	Not Confident	Not Confident	Strongly Disagree	Strongly Disagree	Strongly Agree	Agree	Disagree	Disagree	Strongly Disagree	Strongly Disagree	Strongly Disagree	Strongly Agree	Physician		Pediatrics		178	Fewer than 10 years	36 to 45 years old	Advanced degree (Master's, Doctorate, etc.)	Rural	Yes	White, European American, or European		Woman
Confident	Confident		Not Confident	Not Confident	Confident	Confident	Hesitant	Not Confident	Confident	Not Confident	Not Confident	Not Confident	Not Confident	Not Confident	Confident	Not Confident	Not Confident	Very Confident	Confident	Confident	Confident	Hesitant	Disagree	Disagree	Agree	Agree	Agree	Agree	Strongly Disagree	Strongly Disagree	Strongly Disagree	Strongly Agree	Nurse		Other	surgery	170	20-29 years	46 to 55 years old	College 4 years or more (college graduate)	Rural	Yes	White, European American, or European		Woman
Confident	Hesitant	Hesitant	Hesitant	Confident	Confident	Confident	Hesitant	Not Confident	Not Confident	Not Confident	Not Confident	Not Confident	Not Confident	Not Confident	Not Confident	Not Confident	Not Confident	Not Confident	Not Confident	Not Confident	Not Confident	Not Confident	Disagree	Disagree	Agree	Agree	Agree	Agree	Disagree	Strongly Disagree	Strongly Disagree	Strongly Agree	Nurse		Other	outpatient surgery	170	20-29 years	46 to 55 years old	1 to 3 years after high school (some college, Associate's degree, or technical school)	Rural	Yes	White, European American, or European		Woman
Hesitant	Hesitant	Not Confident	Not Confident	Not Confident	Hesitant	Hesitant	Not Confident	Not Confident	Not Confident	Not Confident	Not Confident	Not Confident	Not Confident	Not Confident	Not Confident	Not Confident	Not Confident	Not Confident	Not Confident	Not Confident	Not Confident	Not Confident
Confident	Confident	Hesitant	Not Confident	Hesitant	Confident	Confident	Hesitant	Not Confident	Not Confident	Not Confident	Not Confident	Not Confident	Not Confident	Not Confident	Not Confident	Not Confident	Not Confident	Confident	Not Confident	Not Confident	Not Confident	Hesitant	Disagree	Agree	Agree	Agree	Agree	Agree	Disagree	Strongly Disagree	Strongly Disagree	Agree	Physician		Pediatrics		178	Fewer than 10 years	26 to 35 years old	Advanced degree (Master's, Doctorate, etc.)	Rural	Yes	White, European American, or European		Woman
Confident	Confident	Hesitant	Not Confident	Hesitant	Confident	Confident	Confident	Confident	Confident	Confident	Not Confident	Not Confident	Hesitant	Not Confident	Not Confident	Not Confident	Confident	Confident	Confident	Confident	Confident	Confident	Strongly Disagree	Strongly Disagree	Agree	Agree	Strongly Agree	Strongly Agree	Strongly Agree	Strongly Disagree	Strongly Disagree	Agree	Physician		Other		178	10-19 years	46 to 55 years old	Advanced degree (Master's, Doctorate, etc.)	Suburban	Prefer not to answer	Asian		Man
Very Confident	Very Confident	Very Confident	Hesitant	Very Confident	Very Confident	Very Confident	Confident	Hesitant	Very Confident	Very Confident	Hesitant	Not Confident	Not Confident	Not Confident	Not Confident	Not Confident	Confident	Confident	Confident	Confident	Confident	Confident	Strongly Agree	Agree	Strongly Agree	Agree	Strongly Agree	Strongly Agree	Agree	Strongly Disagree	Strongly Disagree	Strongly Disagree	Physician		Other	anesthesia	184	30 years or more	56 to 65 years old	Advanced degree (Master's, Doctorate, etc.)	Suburban	No	Asian		Man
Very Confident	Very Confident	Hesitant	Not Confident	Very Confident	Very Confident	Very Confident	Not Confident	Not Confident	Not Confident	Not Confident	Not Confident	Not Confident	Not Confident	Not Confident	Not Confident	Not Confident	Not Confident	Hesitant	Not Confident	Not Confident	Not Confident	Not Confident	Strongly Disagree	Agree	Strongly Agree	Agree	Disagree	Strongly Agree	Disagree	Strongly Disagree	Strongly Disagree	Agree	Physician		Emergency	Radiology	180	10-19 years	46 to 55 years old	Advanced degree (Master's, Doctorate, etc.)	Suburban	No	Asian		Man
Confident	Hesitant	Not Confident	Hesitant	Confident	Hesitant	Confident	Hesitant	Not Confident	Not Confident	Not Confident	Not Confident	Not Confident	Not Confident	Not Confident	Not Confident	Not Confident	Not Confident	Not Confident	Not Confident	Not Confident	Not Confident	Hesitant	Strongly Disagree	Strongly Disagree	Agree	Strongly Disagree	Strongly Disagree	Disagree	Strongly Disagree	Disagree	Strongly Disagree	Strongly Agree	Physician		Pediatrics		170	Fewer than 10 years	36 to 45 years old	Advanced degree (Master's, Doctorate, etc.)	Suburban	Prefer not to answer	Prefer not to answer.		Woman
Confident	Confident	Hesitant	Not Confident	Not Confident	Confident	Confident	Not Confident	Not Confident	Not Confident	Not Confident	Not Confident	Not Confident	Not Confident	Not Confident	Hesitant	Not Confident	Not Confident	Hesitant	Not Confident	Not Confident	Not Confident	Not Confident	Disagree	Agree	Agree	Agree	Agree	Agree	Strongly Disagree	Strongly Disagree	Strongly Disagree	Agree	Physician		Other	Primary Care	178	30 years or more	56 to 65 years old	Advanced degree (Master's, Doctorate, etc.)	Rural	Yes	White, European American, or European		Man
Confident	Hesitant	Hesitant	Hesitant	Hesitant	Hesitant	Hesitant	Hesitant	Hesitant	Hesitant	Hesitant	Hesitant	Hesitant	Hesitant	Hesitant	Hesitant	Hesitant	Hesitant	Hesitant	Hesitant	Hesitant	Hesitant	Hesitant	Disagree	Disagree	Agree	Agree	Agree	Agree	Disagree	Disagree	Strongly Disagree	Agree	Physician		Other	outpatient clinic	187	10-19 years	46 to 55 years old	Advanced degree (Master's, Doctorate, etc.)	Rural	Yes	White, European American, or European		Man
Very Confident	Confident	Confident	Very Confident	Very Confident	Very Confident	Very Confident	Hesitant	Not Confident	Hesitant	Not Confident	Not Confident	Not Confident	Not Confident	Not Confident	Not Confident	Not Confident	Not Confident	Confident	Hesitant	Not Confident	Not Confident	Hesitant	Disagree	Strongly Disagree	Strongly Agree	Strongly Agree	Strongly Disagree	Strongly Disagree	Strongly Disagree	Disagree	Strongly Disagree	Agree	Physician		Pediatrics		178	Fewer than 10 years	26 to 35 years old	Advanced degree (Master's, Doctorate, etc.)	Rural	Yes	White, European American, or European		Woman
Hesitant	Hesitant	Hesitant	Not Confident	Hesitant	Confident	Confident	Hesitant	Hesitant	Hesitant	Hesitant	Hesitant	Hesitant	Hesitant	Hesitant	Hesitant	Hesitant	Hesitant	Hesitant	Hesitant	Hesitant	Hesitant	Hesitant	Disagree	Agree	Agree	Agree	Agree	Agree	Agree	Disagree	Disagree	Disagree	Physician		Other		187	10-19 years	46 to 55 years old	Advanced degree (Master's, Doctorate, etc.)	Rural	No	Asian		Man
Confident	Hesitant	Confident	Confident	Confident	Confident	Confident	Confident	Hesitant	Hesitant	Hesitant	Hesitant	Hesitant	Hesitant	Hesitant	Hesitant	Hesitant	Hesitant	Confident	Confident	Hesitant	Hesitant	Confident	Strongly Disagree	Strongly Disagree	Agree	Agree	Agree	Agree	Disagree	Disagree	Agree	Agree	Physician		Other	occupational medicine	187	20-29 years	46 to 55 years old	Advanced degree (Master's, Doctorate, etc.)	Suburban	Yes	White, European American, or European		Woman
Hesitant	Hesitant	Hesitant	Hesitant	Hesitant	Confident	Confident	Hesitant	Hesitant	Hesitant	Hesitant	Hesitant	Confident	Confident	Not Confident	Confident	Confident	Hesitant	Hesitant	Hesitant	Not Confident	Not Confident	Very Confident	Strongly Disagree	Disagree	Strongly Agree	Strongly Agree	Agree	Agree	Disagree	Strongly Disagree	Strongly Disagree	Strongly Agree	Other	Educator		Education		Prefer not to answer.	36 to 45 years old	Advanced degree (Master's, Doctorate, etc.)	Rural	No	Black, African American, or African		Man
Confident	Confident	Not Confident	Not Confident	Not Confident	Hesitant	Hesitant	Hesitant	Not Confident	Not Confident	Not Confident	Not Confident	Not Confident	Not Confident	Not Confident	Not Confident	Not Confident	Not Confident	Hesitant	Not Confident	Not Confident	Not Confident	Hesitant	Strongly Disagree	Disagree	Agree	Strongly Agree	Agree	Agree	Strongly Disagree	Strongly Disagree	Disagree	Strongly Agree	Other	Pediatric Psychologist	Psychiatry		178	Fewer than 10 years	26 to 35 years old	Advanced degree (Master's, Doctorate, etc.)	Rural	Yes	White, European American, or European		Woman
Confident	Confident	Not Confident	Not Confident	Confident	Confident	Confident	Confident	Not Confident	Not Confident	Not Confident	Not Confident	Not Confident	Not Confident	Not Confident	Not Confident	Not Confident	Not Confident	Not Confident	Not Confident	Not Confident	Not Confident	Not Confident	Agree	Disagree	Agree	Agree	Agree	Agree	Strongly Disagree	Strongly Disagree	Strongly Disagree	Strongly Agree	Physician		Other	hospital medicine	177	30 years or more	56 to 65 years old	Advanced degree (Master's, Doctorate, etc.)	Rural	No	Asian		Man
Hesitant	Hesitant	Hesitant	Hesitant	Hesitant	Hesitant	Confident	Hesitant	Hesitant	Not Confident	Hesitant	Not Confident	Not Confident	Not Confident	Not Confident	Not Confident	Not Confident	Not Confident	Confident	Not Confident	Not Confident	Not Confident	Hesitant	Strongly Disagree	Disagree	Strongly Agree	Strongly Agree	Agree	Agree	Strongly Disagree	Strongly Disagree	Strongly Disagree	Agree	Physician		Other		178	Fewer than 10 years	26 to 35 years old	Advanced degree (Master's, Doctorate, etc.)	Suburban	Yes	White, European American, or European		Woman
Confident	Confident	Not Confident	Hesitant	Hesitant	Hesitant	Confident	Not Confident	Not Confident	Hesitant	Not Confident	Not Confident	Not Confident	Not Confident	Not Confident	Not Confident	Not Confident	Not Confident	Confident	Very Confident	Not Confident	Not Confident	Not Confident	Strongly Disagree	Strongly Disagree	Agree	Agree	Agree	Agree	Disagree	Disagree	Disagree	Agree	Physician		Other	Neurosurgery	178	20-29 years	36 to 45 years old	Advanced degree (Master's, Doctorate, etc.)	Rural	Yes	White, European American, or European		Man
Confident	Confident	Hesitant	Hesitant	Confident	Confident	Confident	Not Confident	Hesitant	Hesitant	Hesitant	Not Confident	Not Confident	Not Confident	Not Confident	Not Confident	Confident	Not Confident	Hesitant	Hesitant	Not Confident	Hesitant	Hesitant	Disagree	Disagree	Agree	Agree	Agree	Agree	Strongly Disagree	Disagree	Strongly Disagree	Agree	Physician		Prefer not to answer.		178	10-19 years	36 to 45 years old	Advanced degree (Master's, Doctorate, etc.)	Rural	Yes	White, European American, or European		Man
Hesitant	Hesitant	Hesitant	Hesitant	Not Confident	Confident	Confident	Hesitant	Hesitant	Hesitant	Hesitant	Not Confident	Not Confident	Not Confident	Not Confident	Hesitant	Not Confident	Not Confident	Confident	Hesitant	Hesitant	Hesitant	Hesitant	Strongly Disagree	Disagree	Agree	Disagree	Agree	Agree	Strongly Disagree	Disagree	Strongly Disagree	Agree	Physician		Psychiatry		178	20-29 years	56 to 65 years old	Advanced degree (Master's, Doctorate, etc.)	Rural	Yes	White, European American, or European		Man
Confident	Confident	Not Confident	Hesitant	Hesitant	Confident	Confident	Hesitant	Hesitant	Hesitant	Hesitant	Not Confident	Not Confident	Not Confident	Not Confident	Not Confident	Not Confident	Hesitant	Hesitant	Not Confident	Hesitant	Hesitant	Hesitant	Strongly Disagree	Strongly Disagree	Strongly Agree	Agree	Agree	Agree	Disagree	Strongly Disagree	Strongly Disagree	Agree	Physician		Prefer not to answer.		170	10-19 years	36 to 45 years old		Suburban	Yes	White, European American, or European		Man
Hesitant	Not Confident	Not Confident	Not Confident	Not Confident	Hesitant	Hesitant	Hesitant	Hesitant	Not Confident	Hesitant	Not Confident	Not Confident	Not Confident	Not Confident	Not Confident	Not Confident	Not Confident	Not Confident	Not Confident	Not Confident	Not Confident	Not Confident	Strongly Disagree	Agree	Agree	Agree	Agree	Agree	Disagree	Strongly Disagree	Strongly Disagree	Strongly Agree	Nurse		Other			Fewer than 10 years	26 to 35 years old	Advanced degree (Master's, Doctorate, etc.)	Rural	Yes	White, European American, or European		Woman
Hesitant	Hesitant	Hesitant	Hesitant	Hesitant	Hesitant	Hesitant	Hesitant	Hesitant	Not Confident	Not Confident	Not Confident	Not Confident	Not Confident	Not Confident	Not Confident	Hesitant	Hesitant	Hesitant	Hesitant	Hesitant	Hesitant	Hesitant	Disagree	Disagree	Strongly Agree	Strongly Agree	Agree	Strongly Disagree	Disagree	Strongly Disagree	Strongly Disagree	Agree	Physician			adult medicine > clinic, hospital, dialysis clinic	170	Fewer than 10 years	46 to 55 years old	Advanced degree (Master's, Doctorate, etc.)	Suburban	Yes	White, European American, or European		Woman
Confident	Confident	Hesitant	Hesitant	Hesitant	Hesitant	Hesitant	Hesitant	Hesitant	Hesitant	Hesitant	Hesitant	Hesitant	Hesitant	Hesitant	Hesitant	Hesitant	Hesitant	Hesitant	Hesitant	Hesitant	Hesitant	Hesitant	Agree	Disagree	Agree	Agree	Agree	Agree	Disagree	Disagree	Disagree	Disagree	Physician		Psychiatry		178	20-29 years	46 to 55 years old	Advanced degree (Master's, Doctorate, etc.)	Rural	Yes	None of these fully describe me.	i don't know if the current President considers me whilte	Man
Confident	Confident	Hesitant	Hesitant	Hesitant	Hesitant	Confident	Hesitant	Hesitant	Confident	Confident	Not Confident	Not Confident	Not Confident	Not Confident	Not Confident	Not Confident	Hesitant	Hesitant	Not Confident	Not Confident	Hesitant	Hesitant	Strongly Disagree	Strongly Disagree	Strongly Agree	Strongly Agree	Agree	Agree	Strongly Disagree	Disagree	Strongly Disagree	Strongly Agree	Physician		Psychiatry		178	10-19 years	36 to 45 years old	Advanced degree (Master's, Doctorate, etc.)	Rural	Yes	White, European American, or European		Woman
Confident	Confident	Confident	Hesitant	Confident	Confident	Confident	Confident	Confident	Hesitant	Hesitant	Confident	Hesitant	Hesitant	Hesitant	Confident	Hesitant	Not Confident	Hesitant	Hesitant	Not Confident	Not Confident	Hesitant	Disagree	Disagree	Agree	Disagree	Agree	Agree	Disagree	Disagree	Disagree	Agree	Physician		Other	Cardiology	178	30 years or more	56 to 65 years old	Advanced degree (Master's, Doctorate, etc.)	Rural	Yes	White, European American, or European		Man
Hesitant	Hesitant	Hesitant	Hesitant	Hesitant	Hesitant	Hesitant	Hesitant	Not Confident	Not Confident	Not Confident	Not Confident	Not Confident	Not Confident	Not Confident	Hesitant	Not Confident	Not Confident	Not Confident	Not Confident	Not Confident	Not Confident	Not Confident	Disagree	Disagree	Strongly Agree	Disagree	Agree	Agree	Strongly Disagree	Strongly Disagree	Strongly Disagree	Agree	Physician		Other	Surgery	178	30 years or more	46 to 55 years old	Advanced degree (Master's, Doctorate, etc.)	Rural	Yes	White, European American, or European		Man
Confident	Confident	Hesitant	Not Confident	Not Confident	Not Confident	Not Confident	Hesitant	Not Confident	Not Confident	Not Confident	Not Confident	Not Confident	Not Confident	Not Confident	Not Confident	Not Confident	Not Confident	Not Confident	Not Confident	Not Confident	Not Confident	Hesitant	Agree	Disagree	Agree	Disagree	Agree	Disagree	Disagree	Disagree	Disagree	Disagree	Physician		Other	radiology	178	Fewer than 10 years	26 to 35 years old	Advanced degree (Master's, Doctorate, etc.)	Rural	Yes	White, European American, or European		Man
Not Confident	Not Confident	Not Confident	Not Confident	Hesitant	Not Confident	Not Confident	Not Confident	Not Confident	Not Confident	Not Confident	Not Confident	Not Confident	Not Confident	Not Confident	Not Confident	Not Confident	Not Confident	Not Confident	Not Confident	Not Confident	Not Confident	Not Confident	Disagree	Strongly Disagree	Agree	Agree	Agree	Agree	Strongly Disagree	Disagree	Disagree	Strongly Agree	Physician		Other	Radiation Oncology	178	20-29 years	46 to 55 years old	Advanced degree (Master's, Doctorate, etc.)	Rural	No	None of these fully describe me.	Indian American	Man
Not Confident	Not Confident	Hesitant	Not Confident	Hesitant	Hesitant	Not Confident	Not Confident	Not Confident	Not Confident	Not Confident	Not Confident	Not Confident	Not Confident	Not Confident	Not Confident	Not Confident	Not Confident	Not Confident	Not Confident	Not Confident	Not Confident	Not Confident	Disagree	Agree	Agree	Agree	Strongly Agree	Agree	Strongly Disagree	Strongly Disagree	Strongly Disagree	Agree	Physician		Other		178	20-29 years	56 to 65 years old	Advanced degree (Master's, Doctorate, etc.)	Rural	Yes	White, European American, or European		Man
Hesitant	Hesitant	Hesitant	Hesitant	Hesitant	Hesitant	Hesitant	Hesitant	Hesitant	Hesitant	Hesitant	Hesitant	Hesitant	Hesitant	Hesitant	Hesitant	Hesitant	Hesitant	Hesitant	Hesitant	Hesitant	Hesitant	Hesitant	Strongly Disagree	Disagree	Agree	Agree	Agree	Agree	Disagree	Disagree	Disagree	Strongly Agree	Nurse		Other	Family Practice	179	20-29 years	36 to 45 years old	College 4 years or more (college graduate)	Rural	Yes	White, European American, or European		Woman
Not Confident	Not Confident	Not Confident	Not Confident	Not Confident	Not Confident	Not Confident	Not Confident	Not Confident	Not Confident	Not Confident	Not Confident	Not Confident	Not Confident	Not Confident	Not Confident	Not Confident	Not Confident	Not Confident	Not Confident	Not Confident	Not Confident	Not Confident	Agree	Agree	Agree	Agree	Disagree	Disagree	Disagree	Disagree	Disagree	Agree	Physician		Other	Hospitalist Medicine	187	Fewer than 10 years	26 to 35 years old	Advanced degree (Master's, Doctorate, etc.)	Urban	No	Asian		Man
Hesitant	Not Confident	Hesitant	Not Confident	Not Confident	Hesitant	Hesitant	Not Confident	Hesitant	Hesitant	Not Confident	Hesitant	Hesitant	Not Confident	Not Confident	Not Confident	Not Confident	Not Confident	Not Confident	Not Confident	Not Confident	Not Confident	Hesitant	Strongly Disagree	Strongly Disagree	Strongly Agree	Disagree	Disagree	Disagree	Strongly Disagree	Disagree	Strongly Disagree	Strongly Agree	Nurse		Other	community educator	178	30 years or more	46 to 55 years old	1 to 3 years after high school (some college, Associate's degree, or technical school)	Rural	Yes	White, European American, or European		Woman
Confident	Confident	Hesitant	Hesitant	Confident	Hesitant	Confident	Hesitant	Not Confident	Not Confident	Not Confident	Not Confident	Not Confident	Not Confident	Not Confident	Not Confident	Not Confident	Not Confident	Hesitant	Not Confident	Not Confident	Not Confident	Not Confident	Disagree	Agree	Agree	Disagree	Agree	Disagree	Strongly Disagree	Strongly Disagree	Strongly Disagree	Agree	Nurse		Other	Intensive Care Unit	178	Fewer than 10 years	26 to 35 years old	Advanced degree (Master's, Doctorate, etc.)	Rural	Yes	White, European American, or European		Man
Hesitant	Hesitant	Not Confident	Not Confident	Not Confident	Confident	Confident	Not Confident	Not Confident	Not Confident	Not Confident	Not Confident	Not Confident	Not Confident	Not Confident	Not Confident	Not Confident	Not Confident	Not Confident	Not Confident	Not Confident	Not Confident	Hesitant	Disagree	Disagree	Agree	Agree	Agree	Agree	Strongly Disagree	Disagree	Disagree	Strongly Agree	Nurse		Other	Case Management	178	20-29 years	36 to 45 years old	1 to 3 years after high school (some college, Associate's degree, or technical school)	Rural	Yes	White, European American, or European		Woman
Confident	Hesitant	Confident	Hesitant	Confident	Confident	Confident	Confident	Confident	Hesitant	Hesitant	Hesitant	Hesitant	Hesitant	Hesitant	Confident	Hesitant	Hesitant	Very Confident	Very Confident	Hesitant	Confident	Confident	Strongly Agree	Disagree	Strongly Agree	Agree	Agree	Agree	Strongly Disagree	Strongly Disagree	Strongly Disagree	Strongly Agree	Nurse		Other	Community Practice Office	166	Fewer than 10 years	26 to 35 years old	College 4 years or more (college graduate)	Rural	Yes	White, European American, or European		Woman
Hesitant	Hesitant	Not Confident	Confident	Very Confident	Hesitant	Hesitant	Not Confident	Not Confident	Hesitant	Hesitant	Not Confident	Not Confident	Not Confident	Not Confident	Not Confident	Hesitant	Hesitant	Very Confident	Confident	Hesitant	Hesitant	Hesitant	Disagree	Disagree	Agree	Agree	Disagree	Agree	Disagree	Disagree	Disagree	Strongly Agree	Nurse		Other	Inpatient	178	30 years or more	56 to 65 years old	College 4 years or more (college graduate)	Rural	Yes	White, European American, or European		Woman
Not Confident	Not Confident	Not Confident	Not Confident	Not Confident	Hesitant	Hesitant	Not Confident	Not Confident	Not Confident	Not Confident	Not Confident	Not Confident	Not Confident	Not Confident	Not Confident	Not Confident	Not Confident	Not Confident	Not Confident	Not Confident	Not Confident	Not Confident	Disagree	Strongly Disagree	Agree	Disagree	Agree	Agree	Strongly Disagree	Strongly Disagree	Strongly Disagree	Agree	Nurse		Other		178	20-29 years	46 to 55 years old	College 4 years or more (college graduate)	Rural	Yes	White, European American, or European		Woman
Very Confident	Very Confident	Very Confident	Very Confident	Very Confident	Very Confident	Confident	Hesitant	Hesitant	Confident	Confident	Hesitant	Hesitant	Not Confident	Hesitant	Not Confident	Not Confident	Not Confident	Hesitant	Hesitant	Hesitant	Hesitant	Confident	Disagree	Disagree	Agree	Agree	Disagree	Disagree	Disagree	Disagree	Disagree	Agree	Nurse		OB/GYN		178	20-29 years		College 4 years or more (college graduate)	Rural	Yes	White, European American, or European		Woman
Confident	Hesitant	Hesitant	Not Confident	Hesitant	Confident	Confident	Not Confident	Not Confident	Not Confident	Not Confident	Not Confident	Not Confident	Not Confident	Not Confident	Not Confident	Not Confident	Not Confident	Hesitant	Hesitant	Not Confident	Not Confident	Not Confident
Hesitant	Hesitant	Hesitant	Hesitant	Not Confident	Hesitant	Hesitant	Hesitant	Hesitant	Not Confident	Not Confident	Not Confident	Not Confident	Not Confident	Not Confident	Not Confident	Not Confident	Not Confident	Not Confident	Not Confident	Not Confident	Not Confident	Hesitant	Disagree	Disagree	Agree	Agree	Agree	Agree	Strongly Disagree	Strongly Disagree	Strongly Disagree	Strongly Agree	Nurse		Other	Case management	170	20-29 years	46 to 55 years old	College 4 years or more (college graduate)	Rural	Yes	White, European American, or European		Woman
Hesitant	Not Confident	Not Confident	Not Confident	Hesitant	Hesitant	Hesitant	Not Confident	Not Confident	Not Confident	Not Confident	Not Confident	Not Confident	Not Confident	Not Confident	Not Confident	Not Confident	Not Confident	Not Confident	Not Confident	Not Confident	Not Confident	Not Confident	Agree	Agree	Strongly Agree	Strongly Agree	Strongly Agree	Agree	Disagree	Strongly Disagree	Strongly Disagree	Agree	Nurse		Other	Quality	170	30 years or more	46 to 55 years old	College 4 years or more (college graduate)	Suburban	Yes	White, European American, or European		Woman
Very Confident	Confident	Confident	Hesitant	Hesitant	Confident	Confident	Confident	Confident	Confident	Confident	Not Confident	Not Confident	Not Confident	Not Confident	Not Confident	Not Confident	Not Confident	Not Confident	Not Confident	Hesitant	Hesitant	Hesitant	Disagree	Disagree	Agree	Agree	Agree	Agree	Strongly Disagree	Disagree	Agree	Strongly Agree	Nurse		Emergency		178	30 years or more	56 to 65 years old	1 to 3 years after high school (some college, Associate's degree, or technical school)	Rural	Yes	White, European American, or European		Woman
Confident	Confident	Hesitant	Hesitant	Hesitant	Hesitant	Hesitant	Hesitant	Hesitant	Hesitant	Hesitant	Not Confident	Not Confident	Not Confident	Not Confident	Not Confident	Not Confident	Not Confident	Not Confident	Not Confident	Hesitant	Not Confident	Hesitant	Disagree	Disagree	Agree	Agree	Agree	Disagree	Disagree	Disagree	Disagree	Agree	Nurse		Emergency		178	30 years or more	46 to 55 years old	College 4 years or more (college graduate)	Suburban	Yes	White, European American, or European		Man
Confident	Hesitant	Not Confident	Not Confident	Hesitant	Confident	Confident	Hesitant	Not Confident	Hesitant	Hesitant	Not Confident	Not Confident	Not Confident	Not Confident	Not Confident	Not Confident	Not Confident	Hesitant	Not Confident	Not Confident	Not Confident	Hesitant	Strongly Disagree	Strongly Disagree	Agree	Disagree	Strongly Agree	Agree	Strongly Disagree	Disagree	Strongly Disagree	Strongly Agree	Other	CRNP	OB/GYN		178	10-19 years	26 to 35 years old	Advanced degree (Master's, Doctorate, etc.)	Rural	Yes	White, European American, or European		Woman
Very Confident	Confident	Not Confident	Not Confident	Not Confident	Confident	Very Confident	Not Confident	Not Confident	Not Confident	Not Confident	Not Confident	Not Confident	Not Confident	Not Confident	Not Confident	Not Confident	Not Confident	Not Confident	Not Confident	Not Confident	Not Confident	Not Confident
Hesitant	Not Confident	Not Confident	Not Confident	Hesitant	Hesitant	Not Confident	Not Confident	Not Confident	Not Confident	Not Confident	Not Confident	Not Confident	Not Confident	Not Confident	Not Confident	Not Confident	Not Confident	Not Confident	Not Confident	Not Confident	Not Confident	Not Confident	Disagree	Disagree	Agree	Disagree	Agree	Agree	Disagree	Disagree	Strongly Disagree	Strongly Agree	Nurse		Other		168	20-29 years	46 to 55 years old	College 4 years or more (college graduate)	Rural	Yes	White, European American, or European		Woman
Confident	Confident	Hesitant	Confident	Confident	Very Confident	Very Confident	Hesitant	Hesitant	Hesitant	Hesitant	Hesitant	Hesitant	Hesitant	Hesitant	Hesitant	Hesitant	Hesitant	Hesitant	Hesitant	Hesitant	Hesitant	Hesitant	Strongly Disagree	Strongly Disagree	Strongly Agree	Strongly Agree	Agree	Strongly Agree	Disagree	Strongly Disagree	Agree	Agree	Prefer not to answer		Prefer not to answer.	dental	178	Fewer than 10 years	36 to 45 years old	Advanced degree (Master's, Doctorate, etc.)	Rural	No	White, European American, or European		Woman
Very Confident	Very Confident	Very Confident	Confident	Confident	Very Confident	Very Confident	Confident	Confident	Confident	Confident	Hesitant	Hesitant	Hesitant	Hesitant	Hesitant	Hesitant	Confident	Confident	Confident	Hesitant	Confident	Confident	Strongly Disagree	Strongly Disagree	Strongly Agree	Strongly Agree	Agree	Agree	Strongly Disagree	Disagree	Strongly Agree	Strongly Agree	Nurse		Other	Trauma	185	30 years or more	56 to 65 years old	Advanced degree (Master's, Doctorate, etc.)	Suburban	Yes	White, European American, or European		Woman
Confident	Hesitant	Hesitant	Hesitant	Hesitant	Hesitant	Hesitant	Hesitant	Hesitant	Hesitant	Hesitant	Hesitant	Hesitant	Hesitant	Hesitant	Hesitant	Hesitant	Hesitant	Confident	Hesitant	Hesitant	Confident	Hesitant	Disagree	Disagree	Agree	Disagree	Agree	Agree	Disagree	Disagree	Disagree	Disagree	Nurse		Other	Infection Prevention	187	30 years or more	56 to 65 years old	College 4 years or more (college graduate)	Suburban	Yes	White, European American, or European		Woman
Confident	Confident	Hesitant	Hesitant	Hesitant	Confident	Confident	Hesitant	Hesitant	Hesitant	Hesitant	Not Confident	Not Confident	Not Confident	Not Confident	Not Confident	Not Confident	Not Confident	Hesitant	Not Confident	Not Confident	Not Confident	Hesitant	Disagree	Disagree	Agree	Agree	Agree	Agree	Disagree	Strongly Disagree	Disagree	Strongly Agree	Nurse		Other			10-19 years	46 to 55 years old	College 4 years or more (college graduate)	Urban	Yes	White, European American, or European		Woman
Very Confident	Confident	Confident	Very Confident	Very Confident	Very Confident	Very Confident	Confident	Confident	Very Confident	Very Confident	Confident	Confident	Hesitant	Confident	Confident	Confident	Hesitant	Very Confident	Confident	Hesitant	Confident	Confident	Agree	Strongly Disagree	Agree	Disagree	Disagree	Disagree	Disagree	Strongly Disagree	Strongly Disagree	Strongly Disagree	Nurse		Other		170	20-29 years	56 to 65 years old	College 4 years or more (college graduate)	Suburban	Yes	White, European American, or European		Woman
Hesitant	Hesitant	Hesitant	Hesitant	Hesitant	Confident	Very Confident	Hesitant	Hesitant	Confident	Confident	Confident	Confident	Hesitant	Confident	Confident	Confident	Confident	Very Confident	Very Confident	Very Confident	Very Confident	Confident	Disagree	Agree	Agree	Agree	Agree	Agree	Strongly Disagree	Strongly Disagree	Strongly Disagree	Strongly Agree	Nurse		Other		187	20-29 years	36 to 45 years old	College 4 years or more (college graduate)	Rural	Yes	White, European American, or European		Woman
Not Confident	Not Confident	Not Confident	Not Confident	Not Confident	Not Confident	Not Confident	Not Confident	Not Confident	Not Confident	Not Confident	Not Confident	Not Confident	Not Confident	Not Confident	Not Confident	Not Confident	Not Confident	Not Confident	Not Confident	Not Confident	Not Confident	Not Confident	Strongly Disagree	Disagree	Agree	Agree	Agree	Agree	Disagree	Disagree	Strongly Disagree	Agree	Nurse		Other	outpatient clinic	187	30 years or more	46 to 55 years old	College 4 years or more (college graduate)	Suburban	Yes	White, European American, or European		Woman
Confident	Hesitant	Confident	Hesitant	Hesitant	Confident	Confident	Hesitant	Hesitant	Not Confident	Hesitant	Not Confident	Not Confident	Not Confident	Not Confident	Not Confident	Not Confident	Not Confident	Not Confident	Not Confident	Not Confident	Not Confident	Not Confident	Disagree	Disagree	Agree	Agree	Agree	Agree	Strongly Disagree	Disagree	Strongly Disagree	Strongly Agree	Nurse		OB/GYN		170	Fewer than 10 years	26 to 35 years old	Advanced degree (Master's, Doctorate, etc.)	Suburban	Yes	White, European American, or European		Woman
Confident	Confident	Confident	Confident	Confident	Confident	Confident	Hesitant	Hesitant	Hesitant	Hesitant	Hesitant	Hesitant	Hesitant	Hesitant	Hesitant	Hesitant	Hesitant	Confident		Hesitant	Hesitant	Hesitant	Disagree	Disagree	Disagree	Agree	Disagree	Agree	Disagree	Disagree	Disagree	Agree	Nurse			cardiac icu/scu	178	Fewer than 10 years	18 to 25 years old	College 4 years or more (college graduate)	Rural	Yes	White, European American, or European		Woman
Confident	Hesitant	Hesitant	Confident	Hesitant	Not Confident	Not Confident	Hesitant	Hesitant	Hesitant	Hesitant	Not Confident	Not Confident	Not Confident	Not Confident	Not Confident	Not Confident	Not Confident	Not Confident	Not Confident	Not Confident	Not Confident	Hesitant	Disagree	Disagree	Agree	Strongly Agree	Disagree	Agree	Strongly Disagree	Disagree	Strongly Disagree	Strongly Agree	Nurse		Other	Critical Care	187	Fewer than 10 years	26 to 35 years old	1 to 3 years after high school (some college, Associate's degree, or technical school)	Urban	Yes	White, European American, or European		Man
Confident	Hesitant	Hesitant	Not Confident	Hesitant	Hesitant	Hesitant	Hesitant	Not Confident	Not Confident	Not Confident	Not Confident	Not Confident	Not Confident	Not Confident	Not Confident	Hesitant	Not Confident	Not Confident	Not Confident	Not Confident	Not Confident	Not Confident	Disagree	Agree	Agree	Disagree	Strongly Disagree	Disagree	Disagree	Strongly Disagree	Disagree	Agree	Nurse		Other	Interventional Radiology	178	Fewer than 10 years	26 to 35 years old	1 to 3 years after high school (some college, Associate's degree, or technical school)	Suburban	Yes	White, European American, or European		Man
Confident	Confident	Not Confident	Not Confident	Very Confident	Confident	Confident	Not Confident	Not Confident	Not Confident	Not Confident	Not Confident	Not Confident	Not Confident	Not Confident	Not Confident	Not Confident	Not Confident	Very Confident	Hesitant	Not Confident	Not Confident	Not Confident	Disagree	Agree	Agree	Disagree	Agree	Disagree	Strongly Disagree	Strongly Disagree	Strongly Disagree	Agree	Nurse		Other	CPSL	.	20-29 years	56 to 65 years old	College 4 years or more (college graduate)	Rural	Yes	White, European American, or European		Woman
Confident	Hesitant	Hesitant	Not Confident	Hesitant	Confident	Confident	Hesitant	Not Confident	Not Confident	Hesitant	Not Confident	Not Confident	Not Confident	Not Confident	Not Confident	Not Confident	Hesitant	Confident	Not Confident	Hesitant	Hesitant	Hesitant	Strongly Disagree	Disagree	Agree	Agree	Agree	Agree	Strongly Disagree	Strongly Disagree	Strongly Disagree	Strongly Agree	Nurse		Other	clinic	178	20-29 years	46 to 55 years old	College 4 years or more (college graduate)	Rural	Yes	White, European American, or European		Woman
Confident	Hesitant	Not Confident	Not Confident	Hesitant	Very Confident	Very Confident	Not Confident	Not Confident	Not Confident	Not Confident	Not Confident	Not Confident	Not Confident	Not Confident	Not Confident	Not Confident	Not Confident	Very Confident	Not Confident	Not Confident	Not Confident	Confident	Strongly Disagree	Strongly Disagree	Strongly Agree	Agree	Disagree	Strongly Disagree	Strongly Disagree	Strongly Disagree	Strongly Disagree	Strongly Agree	Nurse		Prefer not to answer.		170	30 years or more	56 to 65 years old	Advanced degree (Master's, Doctorate, etc.)	Suburban	Yes	White, European American, or European		Woman
Confident	Confident	Hesitant	Hesitant	Very Confident	Very Confident	Very Confident	Not Confident	Not Confident	Not Confident	Hesitant	Not Confident	Not Confident	Not Confident	Not Confident	Not Confident	Not Confident	Not Confident	Not Confident	Hesitant	Not Confident	Not Confident	Not Confident	Strongly Disagree	Disagree	Agree	Strongly Agree	Agree	Agree	Disagree	Strongly Disagree	Strongly Disagree	Strongly Agree	Nurse		Other		187	20-29 years	36 to 45 years old	Advanced degree (Master's, Doctorate, etc.)	Rural	No	White, European American, or European		Woman
Confident	Hesitant	Hesitant	Hesitant	Hesitant	Hesitant	Hesitant	Hesitant	Not Confident	Not Confident	Not Confident	Not Confident	Not Confident	Not Confident	Not Confident	Not Confident	Not Confident	Not Confident	Hesitant	Not Confident	Not Confident	Not Confident	Not Confident	Strongly Disagree	Disagree	Strongly Agree	Agree	Agree	Agree	Disagree	Strongly Disagree	Disagree	Agree	Nurse		Other	Clinic	178	10-19 years	46 to 55 years old	College 4 years or more (college graduate)	Rural	Yes	White, European American, or European		Woman
Very Confident	Confident	Confident	Hesitant	Hesitant	Confident	Confident	Confident	Hesitant	Hesitant	Hesitant	Hesitant	Hesitant	Hesitant	Confident	Confident	Confident	Not Confident	Hesitant	Hesitant	Hesitant	Hesitant	Hesitant	Strongly Disagree	Strongly Disagree	Agree	Agree	Agree	Agree	Disagree	Strongly Disagree	Disagree	Agree	Nurse		OB/GYN		.	30 years or more	56 to 65 years old	1 to 3 years after high school (some college, Associate's degree, or technical school)	Suburban	Yes	White, European American, or European		Woman
Very Confident	Hesitant	Confident	Not Confident	Not Confident	Confident	Confident	Hesitant	Hesitant	Hesitant	Hesitant	Not Confident	Not Confident	Not Confident	Not Confident	Not Confident	Not Confident	Confident	Not Confident	Not Confident	Not Confident	Hesitant	Confident	Agree	Disagree	Strongly Agree	Strongly Agree	Strongly Agree	Strongly Agree	Strongly Disagree	Disagree	Strongly Disagree	Strongly Agree		CNM	OB/GYN		170	10-19 years	26 to 35 years old	Advanced degree (Master's, Doctorate, etc.)	Rural	Yes	Black, African American, or African		Woman
Confident	Hesitant	Hesitant	Confident	Confident	Confident	Confident	Hesitant	Hesitant	Confident	Confident	Hesitant	Hesitant	Hesitant	Hesitant	Hesitant	Hesitant	Hesitant	Hesitant	Hesitant	Hesitant	Hesitant	Hesitant	Disagree	Disagree	Agree	Agree	Agree	Agree	Disagree	Disagree	Disagree	Agree	Nurse		Other	Homecare	170	30 years or more	56 to 65 years old	College 4 years or more (college graduate)	Rural	Yes	White, European American, or European		Woman
Confident	Confident	Not Confident	Not Confident	Not Confident	Confident	Confident	Hesitant	Not Confident	Not Confident	Not Confident	Not Confident	Not Confident	Not Confident	Not Confident	Not Confident	Not Confident	Not Confident	Confident	Hesitant	Not Confident	Not Confident	Hesitant	Disagree	Disagree	Agree	Agree	Disagree	Agree	Disagree	Strongly Disagree	Strongly Disagree	Agree	Nurse		Other		187	30 years or more	56 to 65 years old	College 4 years or more (college graduate)	Urban	Yes	White, European American, or European		Woman
Confident	Hesitant	Hesitant	Hesitant	Hesitant	Hesitant	Not Confident	Hesitant	Hesitant	Hesitant	Hesitant	Not Confident	Not Confident	Not Confident	Not Confident	Not Confident	Not Confident	Not Confident	Hesitant	Not Confident	Not Confident	Hesitant	Hesitant	Disagree	Disagree	Agree	Agree	Disagree	Disagree	Disagree	Strongly Disagree	Strongly Disagree	Agree	Nurse		Other		178	10-19 years	36 to 45 years old	College 4 years or more (college graduate)	Suburban	Yes	White, European American, or European		Woman
Very Confident	Confident	Confident	Hesitant	Confident	Very Confident	Very Confident	Hesitant	Hesitant	Hesitant	Very Confident	Very Confident	Very Confident	Hesitant	Hesitant	Very Confident	Confident	Not Confident	Not Confident	Hesitant	Hesitant	Hesitant	Confident	Disagree	Disagree	Disagree	Agree	Disagree	Agree	Strongly Disagree	Strongly Disagree	Strongly Disagree	Agree	Nurse			i float throughout adult and pediatrics and neonates	178	10-19 years	26 to 35 years old	1 to 3 years after high school (some college, Associate's degree, or technical school)	Suburban	Yes	White, European American, or European		Woman
Confident	Hesitant	Hesitant	Not Confident	Not Confident	Hesitant	Hesitant	Not Confident	Not Confident	Not Confident	Not Confident	Not Confident	Not Confident	Not Confident	Not Confident	Not Confident	Not Confident	Not Confident	Not Confident	Not Confident	Not Confident	Not Confident	Not Confident	Disagree	Disagree	Agree	Agree		Disagree	Disagree		Disagree	Agree
Confident	Confident	Not Confident	Not Confident	Confident	Confident	Confident	Not Confident	Hesitant	Confident	Confident	Not Confident	Not Confident	Not Confident	Not Confident	Not Confident	Not Confident	Not Confident	Confident	Not Confident	Not Confident	Hesitant	Hesitant	Disagree	Agree	Agree	Agree	Agree	Agree	Strongly Disagree	Strongly Disagree	Strongly Disagree	Strongly Agree	Nurse		Pediatrics		178	10-19 years	46 to 55 years old	Prefer not to answer.	Rural	Yes	Prefer not to answer.		Woman
Hesitant	Hesitant	Not Confident	Not Confident	Hesitant	Hesitant	Confident	Not Confident	Not Confident	Not Confident	Not Confident	Not Confident	Hesitant	Hesitant	Not Confident	Not Confident	Not Confident	Not Confident	Not Confident	Not Confident	Not Confident	Not Confident	Not Confident	Disagree	Disagree	Strongly Agree	Agree	Disagree	Disagree	Strongly Disagree	Strongly Disagree	Agree	Disagree	Physician		Other	MED school educator not in actuive practiice	185	30 years or more	66 to 75 years old	Advanced degree (Master's, Doctorate, etc.)	Suburban	Yes	White, European American, or European		Man
Very Confident	Confident	Very Confident	Hesitant	Hesitant	Very Confident	Very Confident	Confident	Hesitant	Hesitant	Hesitant	Not Confident	Confident	Confident	Confident	Confident	Hesitant	Hesitant	Hesitant	Hesitant	Confident	Hesitant	Hesitant	Disagree	Disagree	Agree	Agree	Agree	Disagree	Disagree	Disagree	Strongly Disagree	Disagree	Nurse		Other		170	20-29 years	46 to 55 years old	1 to 3 years after high school (some college, Associate's degree, or technical school)	Rural	Yes	White, European American, or European		Man
Confident	Not Confident	Not Confident	Not Confident	Confident	Confident	Very Confident	Not Confident	Not Confident	Not Confident	Confident	Not Confident	Not Confident	Not Confident	Not Confident	Not Confident	Not Confident	Not Confident	Very Confident	Confident	Hesitant	Hesitant	Hesitant	Disagree	Agree	Agree	Agree	Agree	Agree	Disagree	Strongly Disagree	Strongly Disagree	Agree	Nurse		Other	outpatient	185	30 years or more	46 to 55 years old	1 to 3 years after high school (some college, Associate's degree, or technical school)	Suburban	Yes	White, European American, or European		Woman
Not Confident	Not Confident	Not Confident	Not Confident	Not Confident	Hesitant	Hesitant	Not Confident	Not Confident	Not Confident	Not Confident	Not Confident	Not Confident	Not Confident	Not Confident	Not Confident	Not Confident	Not Confident	Not Confident	Not Confident	Not Confident	Not Confident	Not Confident
Confident	Hesitant	Hesitant	Hesitant	Hesitant	Hesitant	Hesitant	Hesitant	Hesitant	Hesitant	Hesitant	Hesitant	Hesitant	Hesitant	Hesitant	Hesitant	Hesitant	Hesitant	Hesitant	Hesitant	Hesitant	Hesitant	Hesitant	Disagree	Disagree	Agree	Agree	Agree	Agree	Agree	Disagree	Disagree	Agree	Nurse		Other	Med/Surg	178	Fewer than 10 years	26 to 35 years old	College 4 years or more (college graduate)	Rural	Yes	White, European American, or European		Woman
Very Confident	Confident	Hesitant	Not Confident	Not Confident	Confident	Confident	Hesitant	Hesitant	Hesitant	Hesitant	Hesitant	Hesitant	Hesitant	Hesitant	Hesitant	Hesitant	Hesitant	Hesitant	Hesitant	Hesitant	Hesitant	Confident	Disagree	Disagree	Agree	Agree	Agree	Agree	Disagree	Disagree	Disagree	Agree	Nurse		Other	ent	.	Fewer than 10 years	26 to 35 years old	1 to 3 years after high school (some college, Associate's degree, or technical school)	Rural	Yes	White, European American, or European		Woman
Hesitant	Hesitant	Hesitant	Hesitant	Hesitant	Hesitant	Hesitant	Hesitant	Hesitant	Hesitant	Hesitant	Hesitant	Hesitant	Hesitant	Hesitant	Hesitant	Hesitant	Hesitant	Hesitant	Hesitant	Hesitant	Hesitant	Hesitant	Agree	Agree	Agree	Agree	Agree	Agree	Agree	Agree	Agree	Agree	Other		Other			10-19 years	26 to 35 years old	Prefer not to answer.	Prefer not to answer.	Prefer not to answer	Prefer not to answer.		Prefer not to answer.
Hesitant	Not Confident	Hesitant	Not Confident	Not Confident	Hesitant	Not Confident	Hesitant	Not Confident	Not Confident	Not Confident	Not Confident	Not Confident	Not Confident	Not Confident	Hesitant	Not Confident	Not Confident	Not Confident	Not Confident	Hesitant	Not Confident	Not Confident	Agree	Agree	Agree	Disagree	Agree	Agree	Disagree	Strongly Disagree	Strongly Disagree	Disagree
Hesitant	Hesitant	Hesitant	Hesitant	Hesitant	Hesitant	Hesitant	Hesitant	Hesitant	Hesitant	Hesitant	Not Confident	Not Confident	Not Confident	Not Confident	Not Confident	Not Confident	Not Confident	Not Confident	Not Confident	Not Confident	Not Confident	Not Confident	Strongly Disagree	Strongly Disagree	Agree	Agree	Agree	Agree	Disagree	Disagree	Disagree	Strongly Agree	Nurse		Other	Hematology/Oncology	.	30 years or more	56 to 65 years old	1 to 3 years after high school (some college, Associate's degree, or technical school)	Rural	Yes	White, European American, or European		Woman
Confident	Confident	Confident	Confident	Confident	Confident	Confident	Confident	Confident	Confident	Confident	Confident	Confident	Hesitant	Confident	Confident	Confident	Confident	Confident	Hesitant	Confident	Hesitant	Confident	Disagree	Strongly Disagree	Strongly Agree	Agree	Agree	Agree	Agree	Disagree	Agree	Agree	Nurse		Other		178	30 years or more	56 to 65 years old	College 4 years or more (college graduate)	Rural	Yes	White, European American, or European		Woman
Confident	Hesitant		Hesitant	Very Confident	Very Confident	Very Confident	Hesitant	Hesitant	Hesitant	Confident	Hesitant	Hesitant	Hesitant	Hesitant	Confident	Hesitant	Hesitant	Very Confident	Hesitant	Hesitant	Hesitant	Very Confident	Disagree	Strongly Disagree	Agree	Disagree	Strongly Agree	Agree	Disagree	Disagree	Disagree	Agree	Nurse		Other		170	20-29 years	56 to 65 years old	1 to 3 years after high school (some college, Associate's degree, or technical school)	Rural	Yes	White, European American, or European		Woman
Very Confident	Confident	Confident	Hesitant	Hesitant	Confident	Confident	Hesitant	Hesitant	Confident	Confident	Hesitant	Hesitant	Hesitant	Hesitant	Hesitant	Hesitant	Confident	Confident	Confident	Hesitant	Hesitant	Confident	Strongly Disagree	Strongly Disagree	Strongly Agree	Strongly Agree	Strongly Agree	Strongly Agree	Disagree	Disagree	Disagree	Strongly Agree	Nurse		Other		170	20-29 years	36 to 45 years old	Advanced degree (Master's, Doctorate, etc.)	Rural	Yes	White, European American, or European		Woman
Confident	Confident	Confident	Hesitant	Hesitant	Confident	Confident	Hesitant	Hesitant	Hesitant	Hesitant	Not Confident	Not Confident	Not Confident	Not Confident	Not Confident	Not Confident	Not Confident	Hesitant	Hesitant	Hesitant	Hesitant	Hesitant	Disagree	Disagree	Agree	Agree	Agree	Agree	Strongly Disagree	Disagree	Disagree	Agree	Nurse		Prefer not to answer.			Fewer than 10 years	26 to 35 years old	College 4 years or more (college graduate)	Prefer not to answer.	Yes	Prefer not to answer.		Woman
Confident	Hesitant	Confident	Hesitant	Confident	Confident	Confident	Hesitant	Hesitant	Not Confident	Hesitant	Not Confident	Not Confident	Not Confident	Not Confident	Not Confident	Not Confident	Not Confident	Hesitant	Not Confident	Not Confident	Not Confident		Disagree	Agree	Agree	Agree	Disagree	Disagree	Strongly Disagree	Strongly Disagree	Strongly Disagree	Strongly Agree	Nurse		Other	Special care unit	178	Fewer than 10 years	18 to 25 years old	College 4 years or more (college graduate)	Rural	Yes	White, European American, or European		Woman
Hesitant	Hesitant	Not Confident	Not Confident	Hesitant	Confident	Confident	Hesitant	Hesitant	Hesitant	Hesitant	Not Confident	Not Confident	Hesitant	Hesitant	Hesitant	Hesitant	Not Confident	Very Confident	Hesitant	Hesitant	Very Confident	Hesitant	Strongly Disagree	Strongly Disagree	Agree	Agree	Agree	Agree	Strongly Disagree	Strongly Disagree	Strongly Disagree	Strongly Agree	Nurse			Home care nurse	187	Fewer than 10 years	26 to 35 years old	College 4 years or more (college graduate)	Rural	Yes	White, European American, or European		Woman
Hesitant	Not Confident	Not Confident	Not Confident	Not Confident	Not Confident	Not Confident	Not Confident	Not Confident	Not Confident	Not Confident	Not Confident	Not Confident	Not Confident	Not Confident	Not Confident	Not Confident	Not Confident	Not Confident	Not Confident	Not Confident	Not Confident	Not Confident	Disagree	Agree	Agree	Disagree	Agree	Disagree	Strongly Disagree	Strongly Disagree	Strongly Disagree	Agree	Nurse		Other	Educator	187	30 years or more	56 to 65 years old	College 4 years or more (college graduate)	Rural	Yes	White, European American, or European		Woman
Hesitant	Hesitant	Hesitant	Not Confident	Not Confident	Confident	Confident	Hesitant	Not Confident	Not Confident	Confident	Hesitant	Hesitant	Hesitant	Hesitant	Hesitant	Hesitant	Not Confident		Not Confident	Not Confident	Not Confident	Confident	Disagree	Disagree	Agree		Agree	Agree	Disagree	Strongly Disagree	Strongly Disagree	Strongly Agree	Nurse		OB/GYN		185	30 years or more	46 to 55 years old	1 to 3 years after high school (some college, Associate's degree, or technical school)	Suburban	Yes	White, European American, or European		Woman
Confident	Hesitant	Confident	Hesitant	Hesitant	Confident	Hesitant	Hesitant	Hesitant	Hesitant	Confident	Hesitant	Hesitant	Hesitant	Hesitant	Hesitant	Hesitant	Not Confident	Not Confident	Not Confident	Not Confident	Not Confident	Hesitant	Strongly Disagree	Strongly Disagree	Strongly Agree	Strongly Agree	Agree	Agree	Disagree	Disagree	Agree	Agree	Physician		Pediatrics		178	10-19 years	36 to 45 years old	Advanced degree (Master's, Doctorate, etc.)	Rural	Yes	White, European American, or European		Woman
Confident	Hesitant	Confident	Not Confident	Not Confident	Confident	Confident	Hesitant	Not Confident	Not Confident	Not Confident	Hesitant	Not Confident	Not Confident	Not Confident	Not Confident	Not Confident	Not Confident	Confident	Hesitant	Hesitant	Hesitant	Hesitant	Disagree	Disagree	Agree	Agree	Agree	Agree	Disagree	Disagree	Strongly Disagree	Agree	Physician		Other	Extended care	170	20-29 years	56 to 65 years old	Advanced degree (Master's, Doctorate, etc.)	Suburban	Yes	Prefer not to answer.		Woman
Not Confident	Hesitant	Hesitant	Confident	Not Confident	Hesitant	Confident	Not Confident	Not Confident	Not Confident	Not Confident	Not Confident	Not Confident	Not Confident	Not Confident	Hesitant	Not Confident	Not Confident	Not Confident	Not Confident	Not Confident	Not Confident	Hesitant	Strongly Disagree	Strongly Disagree	Agree	Agree	Agree	Agree	Disagree	Strongly Disagree	Disagree	Agree	Nurse		Other			10-19 years	46 to 55 years old	1 to 3 years after high school (some college, Associate's degree, or technical school)	Rural	Yes	None of these fully describe me.		Woman
Not Confident	Confident	Not Confident	Not Confident	Not Confident	Not Confident	Not Confident	Not Confident	Not Confident	Not Confident	Not Confident	Not Confident	Not Confident	Not Confident	Not Confident	Not Confident	Not Confident	Not Confident	Not Confident	Not Confident	Not Confident	Not Confident	Not Confident	Strongly Disagree	Agree	Strongly Disagree	Strongly Disagree	Strongly Disagree	Strongly Disagree	Strongly Disagree	Strongly Disagree	Strongly Disagree	Strongly Disagree	Prefer not to answer		Prefer not to answer.			Prefer not to answer.	Prefer not to answer.	Prefer not to answer.	Suburban	Yes	Prefer not to answer.		Prefer not to answer.
Confident	Confident	Hesitant	Hesitant	Confident	Confident	Confident	Hesitant	Confident	Confident	Confident	Hesitant	Confident	Hesitant	Confident	Confident	Hesitant	Confident	Confident	Confident	Confident	Hesitant	Confident
Very Confident	Confident	Confident	Not Confident	Confident	Confident	Very Confident	Confident	Confident	Hesitant	Confident	Hesitant	Hesitant	Hesitant	Hesitant	Confident	Hesitant	Hesitant	Confident	Not Confident	Not Confident	Not Confident	Not Confident	Disagree	Agree	Agree	Strongly Agree	Agree	Agree	Disagree	Strongly Disagree	Disagree	Agree	Nurse		Other	Operating room	178	20-29 years	46 to 55 years old	Advanced degree (Master's, Doctorate, etc.)	Rural	Yes	White, European American, or European		Woman
Confident	Confident	Hesitant	Not Confident	Not Confident	Not Confident	Not Confident	Not Confident	Not Confident	Not Confident	Not Confident	Not Confident	Not Confident	Not Confident	Not Confident	Not Confident	Not Confident	Not Confident	Not Confident	Not Confident	Not Confident	Not Confident	Not Confident	Agree	Disagree	Disagree	Disagree	Disagree	Agree	Strongly Disagree	Strongly Disagree	Strongly Disagree	Agree	Physician		Other	ortho	178	30 years or more	66 to 75 years old			Yes	White, European American, or European		Man
Hesitant	Hesitant	Hesitant	Not Confident	Hesitant	Hesitant	Hesitant	Hesitant	Hesitant	Hesitant	Hesitant	Hesitant	Hesitant	Hesitant	Hesitant	Hesitant	Hesitant	Hesitant	Hesitant	Hesitant	Hesitant	Hesitant	Hesitant	Agree	Disagree	Agree	Disagree	Strongly Agree	Strongly Agree	Disagree	Strongly Disagree	Strongly Disagree	Disagree	Physician		Other	radiology	178	10-19 years	56 to 65 years old	Advanced degree (Master's, Doctorate, etc.)	Rural	Yes	White, European American, or European		Woman
Confident	Confident	Confident	Hesitant	Hesitant	Confident	Very Confident	Hesitant	Not Confident	Hesitant	Hesitant	Not Confident	Not Confident	Not Confident	Not Confident	Not Confident	Not Confident	Not Confident	Confident	Not Confident	Hesitant	Not Confident	Hesitant
Confident	Hesitant	Not Confident	Not Confident	Not Confident	Hesitant	Hesitant	Not Confident	Not Confident	Not Confident	Not Confident	Not Confident	Not Confident	Not Confident	Not Confident	Not Confident	Not Confident	Not Confident	Not Confident	Not Confident	Not Confident	Not Confident	Not Confident	Disagree	Agree		Agree			Disagree	Strongly Disagree	Strongly Disagree	Agree	Nurse		Other	Outpatient Neurosciences	178	20-29 years	36 to 45 years old	College 4 years or more (college graduate)	Rural	Yes	White, European American, or European		Woman
Very Confident	Very Confident	Very Confident	Very Confident	Very Confident	Very Confident	Very Confident	Confident	Confident	Confident	Confident	Hesitant	Hesitant	Hesitant	Hesitant	Hesitant	Hesitant	Confident	Confident	Confident	Confident	Confident	Confident	Disagree	Strongly Disagree	Disagree	Agree	Agree	Strongly Agree	Disagree	Disagree	Strongly Agree	Agree	Nurse		Other	Inpatient	170	10-19 years	26 to 35 years old	1 to 3 years after high school (some college, Associate's degree, or technical school)	Rural	Yes	White, European American, or European		Woman
Not Confident	Not Confident	Not Confident	Not Confident	Not Confident	Not Confident	Not Confident	Not Confident	Not Confident	Not Confident	Not Confident	Not Confident	Not Confident	Not Confident	Not Confident	Not Confident	Not Confident	Not Confident	Not Confident	Not Confident	Not Confident	Not Confident	Not Confident	Disagree	Strongly Agree	Agree	Agree	Agree	Agree	Strongly Disagree	Strongly Disagree	Strongly Disagree	Agree	Nurse		Other	Scu	178	Fewer than 10 years	18 to 25 years old	College 4 years or more (college graduate)	Rural	Yes	White, European American, or European		Woman
Confident	Not Confident	Hesitant	Confident	Hesitant	Hesitant	Hesitant	Hesitant	Not Confident	Not Confident	Not Confident	Not Confident	Not Confident	Not Confident	Not Confident	Not Confident	Not Confident	Not Confident	Not Confident	Not Confident	Not Confident	Not Confident	Not Confident	Strongly Disagree	Disagree	Agree	Agree	Agree	Agree	Strongly Disagree	Strongly Disagree	Strongly Disagree	Agree	Nurse		Other		178	30 years or more	56 to 65 years old	1 to 3 years after high school (some college, Associate's degree, or technical school)	Rural	Yes	White, European American, or European		Woman
Confident	Confident	Not Confident	Not Confident	Not Confident	Confident	Confident	Hesitant	Hesitant	Hesitant	Hesitant	Not Confident	Hesitant	Not Confident	Not Confident	Confident	Not Confident	Confident	Not Confident	Not Confident	Confident	Hesitant	Confident	Strongly Disagree	Strongly Disagree	Agree	Disagree	Disagree	Strongly Disagree	Strongly Disagree	Strongly Disagree	Strongly Disagree	Agree	Physician		Other	neurology	178	Fewer than 10 years	36 to 45 years old	Advanced degree (Master's, Doctorate, etc.)	Rural	Yes	Prefer not to answer.		Woman
Confident	Hesitant	Hesitant	Hesitant	Hesitant	Confident	Confident	Hesitant	Hesitant	Hesitant	Hesitant	Not Confident	Not Confident	Not Confident	Not Confident	Not Confident	Not Confident	Hesitant	Hesitant	Hesitant	Hesitant	Confident	Hesitant	Disagree	Disagree	Agree	Agree	Agree	Agree	Disagree	Disagree	Disagree	Agree	Physician		Other	Family Practice	179	Fewer than 10 years	26 to 35 years old	Advanced degree (Master's, Doctorate, etc.)	Rural	Yes	White, European American, or European		Man
Confident	Confident	Hesitant	Hesitant	Confident	Confident	Confident	Not Confident	Confident	Hesitant	Hesitant	Confident	Confident	Confident	Confident	Confident	Confident	Hesitant	Hesitant	Hesitant	Hesitant	Hesitant	Hesitant	Disagree	Agree	Agree	Agree	Agree	Agree	Disagree	Disagree	Disagree	Agree	Physician		Other	Family medicine	170	30 years or more	56 to 65 years old	Advanced degree (Master's, Doctorate, etc.)	Suburban	Yes	White, European American, or European		Man
Hesitant	Not Confident	Not Confident	Not Confident	Hesitant	Not Confident	Not Confident	Not Confident	Not Confident	Not Confident	Not Confident	Not Confident	Not Confident	Not Confident	Not Confident	Not Confident	Not Confident	Not Confident	Not Confident	Not Confident	Not Confident	Not Confident	Not Confident	Strongly Disagree	Strongly Disagree	Agree	Agree	Agree	Agree	Strongly Disagree	Strongly Disagree	Strongly Disagree	Agree	Nurse		OB/GYN			10-19 years	36 to 45 years old	Advanced degree (Master's, Doctorate, etc.)	Suburban	Yes	White, European American, or European		Woman
Confident	Hesitant	Hesitant	Not Confident	Not Confident	Hesitant	Hesitant	Hesitant	Not Confident	Not Confident	Not Confident	Not Confident	Not Confident	Not Confident	Not Confident	Not Confident	Not Confident	Not Confident	Hesitant	Not Confident	Hesitant	Hesitant	Hesitant	Strongly Disagree	Strongly Disagree	Strongly Agree	Agree	Agree	Agree	Disagree	Agree	Strongly Disagree	Strongly Agree	Nurse		Pediatrics		178	30 years or more	56 to 65 years old	Advanced degree (Master's, Doctorate, etc.)	Rural	Yes	White, European American, or European		Woman
Hesitant	Hesitant	Hesitant	Hesitant	Confident	Confident	Hesitant	Hesitant	Hesitant	Hesitant	Hesitant	Hesitant	Hesitant	Hesitant	Hesitant	Hesitant	Hesitant	Hesitant	Hesitant	Hesitant	Hesitant	Hesitant	Hesitant	Agree	Disagree	Agree	Agree	Agree	Agree	Disagree	Disagree	Disagree	Agree	Physician		Other		178	Fewer than 10 years	36 to 45 years old	Advanced degree (Master's, Doctorate, etc.)	Rural	Yes	White, European American, or European		Man
Confident	Confident	Confident	Confident	Confident	Confident	Confident	Confident	Confident	Confident	Confident	Confident	Confident	Confident	Confident	Confident	Confident	Confident	Confident	Confident	Confident	Confident	Confident	Disagree	Agree	Disagree	Strongly Agree	Strongly Agree	Agree	Agree	Agree	Agree	Agree	Physician		Other	family practice	170	Fewer than 10 years			Suburban	No	Asian		Woman
Confident	Hesitant	Hesitant	Not Confident	Not Confident	Confident	Confident	Hesitant	Hesitant	Hesitant	Hesitant	Very Confident	Very Confident	Hesitant	Very Confident	Very Confident	Very Confident	Hesitant	Confident	Hesitant	Not Confident	Hesitant	Confident	Strongly Disagree	Disagree	Strongly Agree	Strongly Agree	Strongly Agree	Strongly Agree	Disagree	Strongly Disagree	Disagree	Strongly Agree	Nurse		Other	Care management	178	10-19 years	46 to 55 years old	College 4 years or more (college graduate)	Rural	Yes	White, European American, or European		Woman
Very Confident	Confident	Hesitant	Hesitant	Hesitant	Confident	Very Confident	Not Confident	Hesitant	Hesitant	Very Confident	Confident	Not Confident	Not Confident	Not Confident	Hesitant	Hesitant	Not Confident	Very Confident	Not Confident	Not Confident	Hesitant	Not Confident	Disagree	Disagree	Strongly Agree	Strongly Disagree			Strongly Disagree	Strongly Disagree	Strongly Disagree	Agree	Nurse		Other	pacu		10-19 years		Advanced degree (Master's, Doctorate, etc.)	Suburban	Yes	Prefer not to answer.		Prefer not to answer.
Hesitant	Not Confident	Not Confident	Not Confident	Not Confident	Hesitant	Confident	Not Confident	Not Confident	Not Confident	Confident	Not Confident	Not Confident	Not Confident		Not Confident	Not Confident	Not Confident	Not Confident	Not Confident	Not Confident	Not Confident	Not Confident	Disagree	Disagree	Agree	Disagree	Agree	Agree	Strongly Disagree	Disagree	Strongly Disagree	Strongly Disagree	Nurse		Other	Progressive Care		Fewer than 10 years	18 to 25 years old	College 4 years or more (college graduate)	Rural	Yes	White, European American, or European		Woman
Confident	Confident	Hesitant	Confident	Hesitant	Confident	Confident	Hesitant	Not Confident	Not Confident	Hesitant	Not Confident	Not Confident	Not Confident	Not Confident	Not Confident	Not Confident	Not Confident	Hesitant	Hesitant	Hesitant	Hesitant	Not Confident	Disagree	Disagree	Strongly Agree	Strongly Agree	Agree	Agree	Strongly Disagree	Strongly Disagree	Strongly Disagree	Strongly Agree	Nurse		Other	REDACTED Case Management department	178	20-29 years	36 to 45 years old	1 to 3 years after high school (some college, Associate's degree, or technical school)	Suburban	Yes	White, European American, or European		Woman
Confident	Confident	Confident	Not Confident	Confident	Confident	Not Confident	Hesitant	Not Confident	Hesitant	Hesitant	Not Confident	Not Confident	Not Confident	Not Confident	Not Confident	Not Confident	Not Confident	Not Confident	Not Confident	Not Confident	Not Confident	Not Confident	Agree	Agree	Strongly Disagree	Strongly Disagree	Agree	Agree	Strongly Disagree	Strongly Disagree	Strongly Disagree	Strongly Disagree	Nurse		Other	AICU	178	Fewer than 10 years	26 to 35 years old	Advanced degree (Master's, Doctorate, etc.)	Rural	Yes	American Indian or Alaska Native			Jedi
Hesitant	Not Confident	Hesitant	Not Confident	Hesitant	Hesitant	Not Confident	Not Confident	Not Confident	Not Confident	Not Confident	Not Confident	Not Confident	Not Confident	Not Confident	Not Confident	Not Confident	Not Confident	Not Confident	Not Confident	Not Confident	Not Confident	Not Confident	Agree	Disagree	Agree	Disagree	Agree	Agree	Disagree	Disagree	Strongly Disagree	Agree	Physician		Prefer not to answer.		178	10-19 years	36 to 45 years old	Advanced degree (Master's, Doctorate, etc.)	Rural	No	Asian		Man
Confident	Not Confident	Confident	Hesitant	Hesitant	Not Confident	Not Confident	Not Confident	Not Confident	Not Confident	Not Confident	Not Confident	Not Confident	Not Confident	Not Confident	Not Confident	Not Confident	Not Confident	Hesitant	Not Confident	Not Confident	Not Confident	Not Confident	Strongly Disagree	Disagree	Strongly Agree	Agree	Agree	Agree	Strongly Disagree	Strongly Disagree	Strongly Disagree	Agree	Nurse		OB/GYN		178	Fewer than 10 years	18 to 25 years old	College 4 years or more (college graduate)	Rural	Yes	White, European American, or European		Woman
Confident	Confident	Confident	Not Confident	Hesitant	Confident	Confident	Not Confident	Not Confident	Not Confident	Not Confident	Not Confident	Not Confident	Not Confident	Not Confident	Not Confident	Not Confident	Not Confident	Confident	Not Confident	Confident	Confident	Hesitant	Strongly Disagree	Disagree	Strongly Agree	Agree	Strongly Agree	Strongly Agree	Strongly Disagree	Strongly Disagree	Strongly Disagree	Agree	Nurse		Other	med-surg	170	30 years or more	56 to 65 years old	1 to 3 years after high school (some college, Associate's degree, or technical school)	Rural	Yes	None of these fully describe me.		Woman
Confident	Not Confident	Not Confident	Not Confident	Not Confident	Hesitant	Hesitant	Not Confident	Not Confident	Not Confident	Not Confident	Not Confident	Not Confident	Not Confident	Not Confident	Not Confident	Not Confident	Not Confident	Confident	Not Confident	Not Confident	Not Confident	Not Confident	Strongly Disagree	Strongly Disagree	Agree	Agree	Strongly Agree	Strongly Agree	Disagree	Disagree	Disagree	Agree	Nurse	vascular access	Other	vascular access	178	30 years or more	56 to 65 years old	Prefer not to answer.	Rural	Yes	White, European American, or European		Woman
Hesitant	Not Confident	Hesitant	Not Confident	Not Confident	Not Confident	Not Confident	Not Confident	Not Confident	Not Confident	Not Confident	Not Confident	Not Confident	Not Confident	Not Confident	Not Confident	Not Confident	Not Confident	Not Confident	Not Confident	Not Confident	Not Confident	Not Confident	Disagree	Disagree	Disagree		Agree	Agree	Strongly Disagree	Strongly Disagree	Strongly Disagree	Agree	Nurse		Other		178	30 years or more	56 to 65 years old	1 to 3 years after high school (some college, Associate's degree, or technical school)	Rural	Yes	White, European American, or European		Woman
Hesitant	Hesitant	Hesitant	Not Confident	Not Confident	Hesitant	Hesitant	Not Confident	Hesitant	Not Confident	Hesitant	Not Confident	Not Confident	Not Confident	Not Confident	Not Confident	Not Confident	Not Confident	Not Confident	Not Confident	Not Confident	Hesitant	Hesitant	Strongly Disagree	Disagree	Agree	Agree	Agree	Agree	Strongly Disagree	Disagree	Strongly Disagree	Strongly Agree	Nurse		Pediatrics		187	Fewer than 10 years	18 to 25 years old	College 4 years or more (college graduate)	Rural	Yes	White, European American, or European		Woman
Confident	Hesitant	Hesitant	Not Confident	Not Confident	Very Confident	Very Confident	Not Confident	Not Confident	Not Confident	Not Confident	Hesitant	Hesitant	Not Confident	Confident	Confident	Not Confident	Not Confident	Very Confident	Not Confident	Hesitant	Confident	Not Confident	Disagree	Agree	Agree	Agree	Agree	Agree	Disagree	Disagree	Disagree	Agree	Nurse		Other	med/tele	177	20-29 years	46 to 55 years old	College 4 years or more (college graduate)	Suburban	Yes	None of these fully describe me.		Woman
Confident	Confident	Hesitant	Hesitant	Hesitant	Confident	Confident	Hesitant	Hesitant	Hesitant	Hesitant	Confident	Hesitant	Hesitant	Hesitant	Confident	Hesitant	Hesitant	Hesitant	Hesitant	Hesitant	Hesitant	Hesitant	Disagree	Agree	Strongly Agree	Disagree	Disagree	Disagree	Disagree	Disagree	Strongly Disagree	Agree	Nurse		Pediatrics			30 years or more	56 to 65 years old	Prefer not to answer.	Rural	Yes	Prefer not to answer.		Woman
Confident	Hesitant	Hesitant	Not Confident	Not Confident	Not Confident	Hesitant	Not Confident	Not Confident	Not Confident	Not Confident	Not Confident	Not Confident	Not Confident	Not Confident	Not Confident	Not Confident	Not Confident	Not Confident	Not Confident	Not Confident	Not Confident	Not Confident	Strongly Disagree	Disagree	Agree	Strongly Disagree	Disagree	Disagree	Strongly Disagree	Strongly Disagree	Strongly Disagree	Agree	Physician		Other			30 years or more	56 to 65 years old	Advanced degree (Master's, Doctorate, etc.)	Suburban	Yes	Prefer not to answer.		Man
Confident	Hesitant	Hesitant	Not Confident	Hesitant	Confident	Confident	Not Confident	Not Confident	Hesitant	Not Confident	Not Confident	Not Confident	Not Confident	Not Confident	Not Confident	Not Confident	Not Confident	Not Confident	Not Confident	Not Confident	Not Confident	Not Confident	Disagree	Disagree	Agree	Agree	Agree	Agree	Agree	Disagree	Disagree	Agree	Nurse		Other	HfAM 8	178	Fewer than 10 years	26 to 35 years old	College 4 years or more (college graduate)	Rural	Yes	White, European American, or European		Woman
Confident	Hesitant	Hesitant	Not Confident	Hesitant	Hesitant	Hesitant	Not Confident	Not Confident	Hesitant	Not Confident	Not Confident	Not Confident	Not Confident	Not Confident	Not Confident	Hesitant	Not Confident	Confident	Hesitant	Hesitant	Hesitant	Hesitant	Disagree	Disagree	Agree	Agree	Agree	Agree	Disagree	Strongly Disagree	Disagree	Agree	Nurse		Emergency		170	Fewer than 10 years	36 to 45 years old	1 to 3 years after high school (some college, Associate's degree, or technical school)	Suburban	Yes	White, European American, or European		Woman
Hesitant	Hesitant	Hesitant	Hesitant	Hesitant	Hesitant	Hesitant	Hesitant	Hesitant	Hesitant	Hesitant	Hesitant	Hesitant	Hesitant	Hesitant	Hesitant	Hesitant	Hesitant	Hesitant	Hesitant	Hesitant	Hesitant	Hesitant
Hesitant	Hesitant	Hesitant	Not Confident	Not Confident	Hesitant	Hesitant	Not Confident	Not Confident	Not Confident	Hesitant	Not Confident	Not Confident	Not Confident	Not Confident	Not Confident		Not Confident	Not Confident	Not Confident	Not Confident	Hesitant	Hesitant	Disagree	Agree	Agree	Agree	Disagree	Agree	Disagree	Disagree	Disagree	Agree	Nurse		Other	med-surg	170	Fewer than 10 years	26 to 35 years old	College 4 years or more (college graduate)	Suburban	Yes	White, European American, or European		Woman
Hesitant	Hesitant	Hesitant	Hesitant	Hesitant	Hesitant	Confident	Not Confident	Not Confident	Not Confident	Not Confident	Not Confident	Not Confident	Not Confident	Not Confident	Not Confident	Not Confident	Not Confident	Not Confident	Not Confident	Not Confident	Not Confident	Not Confident	Strongly Disagree	Disagree	Agree	Agree	Disagree	Disagree	Disagree	Disagree	Disagree	Agree	Nurse		Prefer not to answer.	out patient surgery		20-29 years	46 to 55 years old	College 4 years or more (college graduate)	Rural	Yes	White, European American, or European		Woman
Confident	Confident	Hesitant	Hesitant	Hesitant	Hesitant	Hesitant	Hesitant	Hesitant	Hesitant	Hesitant	Hesitant	Hesitant	Hesitant	Hesitant	Confident	Hesitant	Hesitant	Hesitant	Hesitant	Hesitant	Hesitant	Hesitant	Strongly Disagree	Strongly Disagree	Strongly Disagree	Disagree	Disagree	Disagree	Strongly Disagree	Agree	Disagree	Agree	Physician		Other	Skilled nursing/post acute rehab	170	30 years or more	56 to 65 years old	Advanced degree (Master's, Doctorate, etc.)	Suburban	Yes	White, European American, or European		Woman
Confident	Confident	Hesitant	Confident	Confident	Confident	Confident	Hesitant	Hesitant	Hesitant	Hesitant	Not Confident	Not Confident	Not Confident	Not Confident	Not Confident	Not Confident	Confident	Hesitant	Hesitant	Very Confident	Confident	Confident	Disagree	Strongly Disagree	Strongly Agree	Disagree	Strongly Disagree	Strongly Agree	Disagree	Strongly Disagree	Strongly Disagree	Agree	Nurse		Other	Home health	178	10-19 years	26 to 35 years old	1 to 3 years after high school (some college, Associate's degree, or technical school)	Rural	Yes	None of these fully describe me.	Human	Woman
Confident	Hesitant	Hesitant	Hesitant	Hesitant	Confident	Confident	Hesitant	Not Confident	Not Confident	Not Confident	Not Confident	Not Confident	Not Confident	Not Confident	Not Confident	Not Confident	Not Confident	Hesitant	Not Confident	Not Confident	Not Confident	Not Confident	Disagree	Agree	Agree	Disagree	Agree	Disagree	Strongly Disagree	Disagree	Disagree	Agree	Nurse		Other	CPSL site	471	30 years or more	56 to 65 years old	College 4 years or more (college graduate)	Rural	Yes	White, European American, or European		Woman
Hesitant	Hesitant	Hesitant	Hesitant	Hesitant	Hesitant	Confident	Hesitant	Hesitant	Hesitant	Hesitant	Not Confident	Not Confident	Not Confident	Not Confident	Not Confident	Not Confident	Hesitant	Confident	Not Confident	Hesitant	Hesitant	Hesitant	Disagree	Strongly Disagree	Strongly Agree	Agree	Agree	Agree	Strongly Disagree	Disagree	Strongly Disagree	Strongly Agree	Nurse		Other	float	.	20-29 years	36 to 45 years old	College 4 years or more (college graduate)	Rural	Yes	White, European American, or European		Woman
Confident	Not Confident	Hesitant	Hesitant	Hesitant	Hesitant	Not Confident	Not Confident	Not Confident	Not Confident	Not Confident	Hesitant	Hesitant	Hesitant	Hesitant	Hesitant	Hesitant	Hesitant	Hesitant	Hesitant	Hesitant	Hesitant	Hesitant	Disagree	Disagree	Agree	Disagree	Disagree	Agree	Disagree	Disagree		Agree	Physician		Other		178	Fewer than 10 years	26 to 35 years old	Advanced degree (Master's, Doctorate, etc.)	Rural	No	Asian		Man
Confident	Confident	Hesitant	Hesitant	Hesitant	Confident	Confident	Not Confident	Not Confident	Not Confident	Not Confident	Not Confident	Not Confident	Not Confident	Not Confident	Not Confident	Not Confident	Not Confident	Not Confident	Not Confident	Not Confident	Not Confident	Not Confident
Confident	Confident	Hesitant	Hesitant	Confident	Confident	Confident	Confident	Hesitant	Hesitant	Hesitant	Hesitant	Hesitant	Hesitant	Hesitant	Confident	Confident	Hesitant	Hesitant	Hesitant	Hesitant	Hesitant	Hesitant	Disagree	Agree	Agree	Disagree	Disagree	Disagree	Strongly Disagree	Strongly Disagree	Disagree	Agree	Nurse		Other	Surgery	185	30 years or more	56 to 65 years old	1 to 3 years after high school (some college, Associate's degree, or technical school)	Suburban	Yes	White, European American, or European		Woman
Confident	Hesitant	Hesitant	Hesitant	Confident	Hesitant	Confident	Hesitant	Hesitant	Hesitant	Confident	Not Confident	Not Confident	Not Confident	Not Confident	Not Confident	Not Confident	Hesitant	Hesitant	Hesitant	Confident	Confident	Hesitant	Agree	Disagree	Agree	Disagree	Disagree	Disagree	Disagree	Strongly Disagree	Disagree	Agree	Nurse		Other	float pool	178	20-29 years	36 to 45 years old	1 to 3 years after high school (some college, Associate's degree, or technical school)	Rural	Yes	White, European American, or European		Man
Confident	Confident	Hesitant	Confident	Confident	Confident	Confident	Hesitant	Hesitant	Hesitant	Hesitant	Hesitant	Hesitant	Hesitant	Hesitant	Hesitant	Hesitant	Hesitant	Confident	Hesitant	Hesitant	Hesitant	Confident	Disagree	Disagree	Disagree	Disagree	Disagree	Disagree	Disagree	Disagree	Disagree	Agree	Nurse		Other		178	10-19 years	36 to 45 years old	College 4 years or more (college graduate)	Urban	Yes	None of these fully describe me.		Woman
Very Confident	Confident	Confident	Confident	Confident	Confident	Confident	Hesitant	Hesitant	Not Confident	Hesitant	Not Confident	Not Confident	Not Confident	Not Confident	Not Confident	Not Confident	Not Confident	Not Confident	Not Confident	Not Confident	Not Confident	Not Confident	Disagree	Disagree	Agree	Strongly Disagree	Strongly Disagree	Disagree	Strongly Disagree	Strongly Disagree	Strongly Disagree	Strongly Agree	Physician		Other	cpsl-family med	170	30 years or more	56 to 65 years old	Advanced degree (Master's, Doctorate, etc.)	Rural	Yes	White, European American, or European		Woman
Confident	Hesitant	Hesitant	Not Confident	Not Confident	Hesitant	Not Confident	Hesitant	Hesitant	Hesitant	Hesitant	Hesitant	Not Confident	Not Confident	Not Confident	Hesitant	Not Confident	Not Confident	Not Confident	Not Confident	Hesitant	Hesitant	Hesitant	Disagree	Disagree	Agree	Agree	Disagree	Disagree	Strongly Disagree	Strongly Disagree	Strongly Disagree	Agree	Nurse		Other	home health	170	Fewer than 10 years	18 to 25 years old	College 4 years or more (college graduate)	Rural	Yes	White, European American, or European		Woman
Confident	Confident	Hesitant	Hesitant	Hesitant	Hesitant	Hesitant	Hesitant	Confident	Hesitant	Hesitant	Not Confident	Not Confident	Not Confident	Not Confident	Not Confident	Not Confident	Not Confident	Not Confident	Not Confident	Hesitant	Hesitant	Hesitant	Disagree	Strongly Disagree	Strongly Agree	Agree	Agree	Agree	Strongly Disagree	Strongly Disagree	Strongly Disagree	Agree	Nurse		Pediatrics		178	Fewer than 10 years	26 to 35 years old	College 4 years or more (college graduate)	Rural	Yes	White, European American, or European		Woman
Confident	Not Confident	Not Confident	Not Confident	Not Confident	Not Confident	Not Confident	Not Confident	Not Confident	Not Confident	Not Confident	Not Confident	Not Confident	Not Confident	Not Confident	Not Confident	Not Confident	Not Confident	Not Confident	Not Confident	Not Confident	Not Confident	Not Confident	Agree	Disagree	Agree	Agree	Agree	Agree	Disagree	Disagree	Disagree	Strongly Agree	Nurse		OB/GYN		187	10-19 years	36 to 45 years old	College 4 years or more (college graduate)	Rural	Yes	White, European American, or European		Woman
Confident	Hesitant	Not Confident	Not Confident	Not Confident	Not Confident	Not Confident	Not Confident	Not Confident	Not Confident	Not Confident	Not Confident	Not Confident	Not Confident	Not Confident	Not Confident	Not Confident	Not Confident	Not Confident	Not Confident	Not Confident	Not Confident	Not Confident	Disagree	Agree	Agree	Agree	Disagree	Disagree	Strongly Disagree	Strongly Disagree	Strongly Disagree	Agree	Nurse		Other	Agp5	178	20-29 years	46 to 55 years old	College 4 years or more (college graduate)	Rural	Yes	Hispanic, Latino, or Spanish		Woman
Confident	Very Confident	Hesitant	Not Confident	Hesitant	Confident	Confident	Hesitant	Hesitant	Hesitant	Hesitant	Not Confident	Not Confident	Not Confident	Not Confident	Not Confident	Not Confident	Not Confident	Hesitant	Hesitant	Confident	Confident	Hesitant	Strongly Disagree	Strongly Disagree	Agree	Strongly Agree	Agree	Agree	Disagree	Disagree	Disagree	Strongly Agree	Nurse		OB/GYN		187	Fewer than 10 years	36 to 45 years old	College 4 years or more (college graduate)	Suburban	Yes	White, European American, or European		Woman
Very Confident	Very Confident	Confident	Hesitant	Confident	Not Confident	Not Confident	Not Confident	Not Confident	Not Confident	Not Confident	Not Confident	Not Confident	Not Confident	Not Confident	Not Confident	Not Confident	Not Confident	Not Confident	Not Confident	Not Confident	Not Confident	Not Confident	Disagree	Disagree	Agree	Agree	Agree	Agree	Strongly Disagree	Strongly Disagree	Strongly Disagree	Agree	Nurse		Other	stepdown	187	10-19 years	26 to 35 years old	College 4 years or more (college graduate)	Suburban	Yes	White, European American, or European		Woman
Confident	Confident	Confident	Confident	Confident	Confident	Confident	Confident	Hesitant	Hesitant	Hesitant	Confident	Confident	Hesitant	Hesitant	Hesitant	Confident	Hesitant	Confident	Confident	Hesitant	Hesitant	Confident	Strongly Disagree	Strongly Disagree	Strongly Agree	Agree	Agree	Agree	Disagree	Agree	Agree	Agree	Nurse		Emergency		178	Fewer than 10 years	46 to 55 years old	College 4 years or more (college graduate)	Rural	Yes	White, European American, or European		Woman
Hesitant	Not Confident	Not Confident	Not Confident	Not Confident	Hesitant	Hesitant	Not Confident	Not Confident	Hesitant	Not Confident	Hesitant	Hesitant	Not Confident	Hesitant	Hesitant	Hesitant	Not Confident	Not Confident	Hesitant	Hesitant	Hesitant	Hesitant
Hesitant	Not Confident	Not Confident	Not Confident	Not Confident	Hesitant	Not Confident	Not Confident	Hesitant	Not Confident	Not Confident	Not Confident	Not Confident	Not Confident	Not Confident	Not Confident	Not Confident	Not Confident	Not Confident	Not Confident	Hesitant	Not Confident	Not Confident	Strongly Disagree	Disagree	Agree	Agree	Agree	Agree	Disagree	Agree	Disagree	Agree	Nurse		Other	Drug and Alcohol Treatment	184	Fewer than 10 years	36 to 45 years old	College 4 years or more (college graduate)	Rural	Yes	White, European American, or European		Woman
Very Confident	Very Confident	Confident	Hesitant	Very Confident	Confident	Confident			Not Confident	Not Confident	Not Confident	Not Confident	Not Confident	Not Confident	Not Confident	Not Confident	Not Confident	Hesitant	Hesitant	Hesitant	Hesitant	Hesitant	Disagree	Disagree	Agree	Disagree	Agree	Agree	Disagree	Strongly Disagree	Disagree	Agree	Nurse		Pediatrics		178	Fewer than 10 years	26 to 35 years old	College 4 years or more (college graduate)	Suburban	Yes	White, European American, or European		Man
Confident	Hesitant	Confident	Confident	Confident	Confident	Confident	Hesitant	Not Confident	Hesitant	Confident	Not Confident	Not Confident	Not Confident	Not Confident	Hesitant	Hesitant	Hesitant	Hesitant	Hesitant	Confident	Hesitant	Confident	Disagree	Strongly Disagree	Agree	Agree	Agree	Agree	Disagree	Disagree	Strongly Disagree	Agree	Nurse		OB/GYN		170	Fewer than 10 years	18 to 25 years old	College 4 years or more (college graduate)	Suburban	Yes	White, European American, or European		Woman
Confident	Hesitant	Confident	Hesitant	Hesitant	Confident	Confident	Not Confident	Not Confident	Not Confident	Not Confident	Not Confident	Not Confident	Not Confident	Not Confident	Not Confident	Not Confident	Not Confident	Confident	Not Confident	Not Confident	Not Confident	Not Confident	Disagree	Disagree	Agree	Agree	Disagree	Disagree	Disagree	Disagree	Strongly Disagree	Agree	Nurse		Pediatrics		178	30 years or more	46 to 55 years old	College 4 years or more (college graduate)	Rural	Yes	White, European American, or European		Woman
Confident	Confident	Hesitant	Not Confident	Not Confident	Hesitant	Confident	Not Confident	Not Confident	Not Confident	Not Confident	Not Confident	Not Confident	Not Confident	Not Confident	Not Confident	Not Confident	Not Confident	Not Confident	Not Confident	Not Confident	Not Confident	Not Confident	Strongly Disagree	Disagree	Agree	Agree	Agree	Agree	Strongly Disagree	Disagree	Strongly Disagree	Strongly Agree	Nurse		Other	orthopedics	170	Fewer than 10 years	36 to 45 years old	College 4 years or more (college graduate)	Suburban	Yes	White, European American, or European		Woman
Not Confident	Not Confident	Not Confident	Not Confident	Hesitant	Hesitant	Hesitant	Not Confident	Not Confident	Not Confident	Not Confident	Not Confident	Not Confident	Not Confident	Not Confident	Hesitant	Not Confident	Not Confident	Not Confident	Not Confident	Not Confident	Not Confident	Not Confident	Strongly Disagree	Strongly Disagree	Strongly Agree	Strongly Disagree	Disagree	Agree	Strongly Disagree	Strongly Disagree	Strongly Disagree	Strongly Agree	Physician		Other	Primary care	177	10-19 years	36 to 45 years old	Advanced degree (Master's, Doctorate, etc.)	Rural	No	Asian		Man
Hesitant	Not Confident	Hesitant	Hesitant	Confident	Very Confident	Very Confident	Not Confident	Not Confident	Confident	Confident	Not Confident	Not Confident	Not Confident	Not Confident	Not Confident	Not Confident	Not Confident	Not Confident	Not Confident	Not Confident	Not Confident	Hesitant	Disagree	Agree	Agree	Agree	Agree	Agree	Disagree	Strongly Disagree	Strongly Disagree	Agree	Nurse		Pediatrics		178	Fewer than 10 years	18 to 25 years old	College 4 years or more (college graduate)	Suburban	Yes	White, European American, or European		Woman
Confident	Hesitant		Not Confident	Confident	Confident	Confident	Not Confident	Hesitant	Hesitant	Hesitant	Not Confident	Hesitant	Not Confident	Not Confident	Hesitant	Hesitant	Hesitant	Confident	Hesitant	Confident	Confident	Confident	Disagree	Disagree	Agree	Disagree	Agree	Disagree	Strongly Disagree	Disagree	Strongly Disagree	Strongly Agree	Nurse		Emergency		187	20-29 years	56 to 65 years old	1 to 3 years after high school (some college, Associate's degree, or technical school)	Suburban	Yes	White, European American, or European		Woman
Very Confident	Confident	Confident	Confident	Confident	Confident	Confident	Confident	Confident	Hesitant	Hesitant	Confident	Not Confident	Not Confident	Not Confident	Not Confident	Not Confident	Not Confident	Confident	Hesitant	Not Confident	Not Confident	Not Confident	Strongly Disagree	Strongly Disagree	Agree	Agree	Agree	Agree	Disagree	Disagree	Strongly Disagree	Agree	Physician		Emergency		178	10-19 years	46 to 55 years old	Advanced degree (Master's, Doctorate, etc.)	Rural	Yes	White, European American, or European		Woman
Confident	Hesitant	Hesitant	Hesitant	Hesitant	Hesitant	Hesitant	Hesitant	Hesitant	Hesitant	Hesitant	Hesitant	Hesitant	Hesitant	Hesitant	Hesitant	Hesitant	Hesitant	Hesitant	Hesitant	Hesitant	Hesitant	Hesitant	Disagree	Disagree	Agree	Disagree	Agree	Agree	Disagree	Disagree	Disagree	Agree	Nurse		Other	Float	170	Fewer than 10 years	36 to 45 years old	College 4 years or more (college graduate)	Suburban	Yes	White, European American, or European		Woman
Confident	Confident	Confident	Hesitant	Very Confident	Confident	Confident	Hesitant	Hesitant	Hesitant	Hesitant	Not Confident	Not Confident	Not Confident	Not Confident	Not Confident	Not Confident	Not Confident	Confident	Hesitant	Not Confident	Not Confident	Hesitant	Disagree	Agree	Strongly Agree	Agree	Agree	Disagree	Disagree	Disagree	Disagree	Agree	Physician		Other		187	10-19 years	36 to 45 years old	Advanced degree (Master's, Doctorate, etc.)	Urban	No	Middle Eastern or North African		Man
Not Confident	Not Confident	Not Confident	Not Confident	Not Confident	Not Confident	Not Confident	Not Confident	Not Confident	Not Confident	Hesitant	Not Confident	Not Confident	Not Confident	Not Confident	Not Confident	Not Confident	Not Confident	Confident	Hesitant	Not Confident	Not Confident	Not Confident	Disagree	Disagree									Nurse		Prefer not to answer.			30 years or more	56 to 65 years old	1 to 3 years after high school (some college, Associate's degree, or technical school)	Rural	Yes	White, European American, or European		Woman
Confident	Confident	Confident	Hesitant	Confident	Confident	Confident	Not Confident	Not Confident	Not Confident	Not Confident	Not Confident	Not Confident	Not Confident	Not Confident	Not Confident	Not Confident	Hesitant		Hesitant	Not Confident	Not Confident	Not Confident	Disagree	Disagree	Agree	Agree	Agree	Agree	Disagree	Disagree	Agree	Agree	Nurse		Other	Intensive Care	178	Fewer than 10 years	26 to 35 years old	College 4 years or more (college graduate)	Rural	Yes	White, European American, or European		Woman
Confident	Hesitant	Hesitant	Not Confident	Hesitant	Confident	Confident	Hesitant	Not Confident	Hesitant	Not Confident	Not Confident	Not Confident	Not Confident	Not Confident	Not Confident	Not Confident	Hesitant	Confident	Hesitant	Hesitant	Hesitant	Hesitant	Disagree	Agree	Disagree	Agree	Agree	Agree	Disagree	Strongly Disagree	Disagree	Strongly Agree	Nurse		Other	ICU	170	Fewer than 10 years	18 to 25 years old	College 4 years or more (college graduate)	Rural	Yes	White, European American, or European		Woman
Hesitant	Not Confident	Not Confident	Not Confident	Hesitant	Hesitant	Hesitant	Not Confident	Not Confident	Not Confident	Not Confident	Not Confident	Not Confident	Not Confident	Not Confident	Not Confident	Not Confident	Not Confident	Hesitant	Hesitant	Not Confident	Not Confident	Hesitant	Strongly Disagree	Strongly Disagree	Strongly Agree	Strongly Agree	Agree	Agree	Strongly Disagree	Strongly Disagree	Strongly Disagree	Agree	Physician		Other	Infectious diseases	187	10-19 years	36 to 45 years old	Advanced degree (Master's, Doctorate, etc.)	Rural	Yes	White, European American, or European		Woman
Confident	Hesitant	Not Confident	Not Confident	Hesitant	Not Confident	Hesitant	Not Confident	Not Confident	Not Confident	Not Confident	Not Confident	Hesitant	Not Confident	Not Confident	Hesitant	Not Confident	Not Confident	Not Confident	Not Confident	Not Confident	Not Confident	Not Confident	Disagree	Disagree	Agree	Agree	Agree	Agree	Disagree	Disagree	Disagree	Strongly Agree	Nurse		Other	Flight Nurse	178	Fewer than 10 years	26 to 35 years old	1 to 3 years after high school (some college, Associate's degree, or technical school)	Suburban	Yes	White, European American, or European		Man
Confident	Confident	Hesitant	Not Confident	Not Confident	Confident	Confident	Hesitant	Not Confident	Not Confident	Confident	Not Confident	Not Confident	Not Confident	Not Confident	Not Confident	Not Confident	Not Confident	Confident	Not Confident	Hesitant	Hesitant	Confident	Strongly Disagree	Disagree	Agree	Agree	Agree	Strongly Agree	Disagree	Disagree	Strongly Disagree	Strongly Agree	Nurse		Other	ICU	187	Fewer than 10 years	26 to 35 years old	1 to 3 years after high school (some college, Associate's degree, or technical school)	Suburban	Yes	White, European American, or European		Woman
Confident	Not Confident	Hesitant	Not Confident	Not Confident	Hesitant	Hesitant	Not Confident	Not Confident	Not Confident	Not Confident	Not Confident	Not Confident	Not Confident	Not Confident	Not Confident	Not Confident	Not Confident	Not Confident	Not Confident	Not Confident	Not Confident	Not Confident	Strongly Disagree	Disagree	Strongly Agree	Strongly Agree	Disagree	Disagree	Disagree	Disagree	Strongly Disagree	Strongly Agree	Nurse		OB/GYN		170	20-29 years	36 to 45 years old	College 4 years or more (college graduate)	Suburban	Yes	White, European American, or European		Woman
Very Confident	Confident	Confident	Not Confident	Confident	Confident	Confident	Hesitant	Hesitant	Hesitant	Hesitant	Not Confident	Not Confident	Not Confident	Not Confident	Not Confident	Not Confident	Hesitant	Very Confident	Hesitant	Hesitant	Hesitant	Hesitant	Agree	Disagree	Agree	Disagree	Agree	Agree	Disagree	Strongly Disagree	Strongly Disagree	Agree	Nurse		Other		187	20-29 years	36 to 45 years old	College 4 years or more (college graduate)	Suburban	Yes	White, European American, or European		Woman
Hesitant	Hesitant	Not Confident	Not Confident	Not Confident	Hesitant	Hesitant	Not Confident	Not Confident	Not Confident	Not Confident	Not Confident	Not Confident	Not Confident	Not Confident	Not Confident	Not Confident	Not Confident	Not Confident	Not Confident	Not Confident	Not Confident	Not Confident	Strongly Disagree	Agree	Agree	Agree	Agree	Agree	Strongly Disagree	Disagree	Strongly Disagree	Agree	Physician		Other	internal medicine	187	Fewer than 10 years	26 to 35 years old	Advanced degree (Master's, Doctorate, etc.)	Suburban	Yes	Prefer not to answer.		Man
Confident	Hesitant	Hesitant	Hesitant	Hesitant	Confident	Confident	Hesitant	Hesitant	Hesitant	Confident	Hesitant	Hesitant	Hesitant	Hesitant	Hesitant	Hesitant	Hesitant	Confident	Hesitant	Hesitant	Confident	Confident	Agree	Agree	Agree	Agree	Disagree	Agree	Strongly Disagree	Strongly Disagree	Strongly Disagree	Disagree	Nurse		Pediatrics		178	Fewer than 10 years	18 to 25 years old	College 4 years or more (college graduate)	Rural	Yes	White, European American, or European		Woman
Confident	Hesitant	Hesitant	Hesitant	Hesitant	Confident	Confident	Hesitant	Hesitant	Hesitant	Hesitant	Hesitant	Hesitant	Hesitant	Hesitant	Hesitant	Hesitant	Hesitant	Hesitant	Hesitant	Hesitant	Hesitant	Hesitant	Strongly Disagree	Disagree	Strongly Disagree	Strongly Disagree	Strongly Disagree	Strongly Disagree	Agree	Agree	Agree	Agree	Nurse		Other		170	30 years or more	56 to 65 years old	1 to 3 years after high school (some college, Associate's degree, or technical school)	Rural	Yes	White, European American, or European		Woman
Hesitant	Hesitant	Hesitant	Confident	Confident	Hesitant	Confident	Not Confident	Hesitant	Not Confident	Confident	Hesitant	Hesitant	Hesitant	Hesitant	Hesitant	Hesitant	Confident	Confident	Confident	Not Confident	Not Confident	Hesitant	Strongly Disagree	Disagree	Strongly Agree	Agree	Strongly Agree	Strongly Agree	Strongly Disagree	Strongly Disagree	Strongly Disagree	Strongly Agree	Nurse		Emergency		170	Fewer than 10 years	26 to 35 years old	College 4 years or more (college graduate)	Rural	Yes	White, European American, or European		Woman
Confident	Confident	Hesitant	Hesitant	Hesitant	Confident	Confident	Hesitant	Hesitant	Not Confident	Not Confident	Not Confident	Not Confident	Not Confident	Not Confident	Not Confident	Not Confident	Not Confident	Very Confident	Hesitant	Confident	Hesitant	Hesitant	Strongly Disagree	Strongly Disagree	Strongly Agree	Disagree	Disagree	Disagree	Disagree	Strongly Disagree	Disagree	Strongly Agree	Nurse		Other	telemetry	170	Prefer not to answer.		Prefer not to answer.	Prefer not to answer.	Yes	Prefer not to answer.		Prefer not to answer.
Confident	Confident	Hesitant	Confident	Confident	Confident	Confident	Hesitant	Hesitant	Confident	Confident	Confident	Hesitant	Not Confident	Not Confident	Hesitant	Hesitant	Confident	Confident	Confident	Confident	Hesitant	Confident	Disagree	Disagree	Agree	Disagree	Disagree	Disagree	Disagree	Disagree	Disagree	Agree	Physician		Pediatrics		179	10-19 years	36 to 45 years old	Advanced degree (Master's, Doctorate, etc.)	Rural	Yes	White, European American, or European		Woman
Confident	Confident	Hesitant	Not Confident	Not Confident	Hesitant	Hesitant	Hesitant	Hesitant	Confident	Confident	Confident	Hesitant	Hesitant	Hesitant	Hesitant	Not Confident	Hesitant	Confident	Confident	Confident	Confident	Confident	Disagree	Disagree	Agree	Agree	Agree	Agree	Disagree	Disagree	Disagree	Agree	Nurse		Emergency		178	20-29 years	36 to 45 years old	Prefer not to answer.	Prefer not to answer.	Yes	Prefer not to answer.		Prefer not to answer.
Confident	Hesitant	Confident	Hesitant	Confident	Hesitant	Hesitant	Not Confident	Not Confident	Not Confident	Not Confident	Not Confident	Not Confident	Not Confident	Not Confident	Not Confident	Not Confident	Not Confident	Hesitant	Hesitant	Confident	Not Confident	Hesitant	Agree	Strongly Disagree	Agree	Agree	Agree	Disagree	Strongly Disagree	Strongly Disagree	Strongly Disagree	Strongly Agree	Nurse		Emergency		178	10-19 years	56 to 65 years old	College 4 years or more (college graduate)	Rural	Yes	White, European American, or European		Man
Very Confident	Hesitant	Confident	Not Confident	Confident	Confident	Confident	Not Confident	Not Confident	Not Confident	Not Confident	Not Confident	Not Confident	Not Confident	Not Confident	Not Confident	Not Confident	Not Confident	Not Confident	Not Confident	Hesitant	Hesitant	Not Confident	Disagree	Disagree	Agree	Strongly Agree	Agree	Agree	Strongly Disagree	Strongly Disagree	Strongly Disagree	Strongly Agree	Nurse		Other	Medical/Surgical	178	Fewer than 10 years	18 to 25 years old	College 4 years or more (college graduate)	Rural	Yes	White, European American, or European		Woman
Confident	Not Confident	Confident	Hesitant	Hesitant	Confident	Confident	Hesitant	Hesitant	Confident	Confident	Not Confident	Not Confident	Not Confident	Not Confident	Not Confident	Not Confident	Confident	Confident	Confident	Hesitant	Confident	Hesitant	Strongly Disagree	Disagree	Strongly Agree	Agree	Agree	Agree	Strongly Disagree	Strongly Agree	Strongly Disagree	Strongly Agree	Nurse		Emergency		178	20-29 years	36 to 45 years old	College 4 years or more (college graduate)	Rural	Yes	White, European American, or European		Woman
Confident	Not Confident	Hesitant	Hesitant	Hesitant	Hesitant	Confident	Hesitant	Not Confident	Not Confident	Hesitant	Not Confident	Not Confident	Not Confident	Not Confident	Not Confident	Not Confident	Not Confident	Hesitant	Hesitant	Not Confident	Not Confident	Hesitant	Disagree	Disagree	Agree	Agree	Agree	Agree	Disagree	Disagree	Disagree	Agree	Nurse		Other	telemetry	187	Fewer than 10 years	26 to 35 years old	College 4 years or more (college graduate)	Suburban	Yes	Hispanic, Latino, or Spanish		Woman
Confident	Hesitant	Hesitant	Not Confident	Not Confident	Confident	Hesitant	Hesitant	Hesitant	Hesitant	Hesitant	Hesitant	Hesitant	Hesitant	Hesitant	Hesitant	Hesitant	Hesitant	Confident	Hesitant	Confident	Hesitant	Hesitant	Disagree	Agree	Agree	Agree	Disagree	Disagree	Disagree	Disagree	Disagree	Disagree	Nurse		Pediatrics		178	30 years or more	46 to 55 years old	College 4 years or more (college graduate)	Rural	Yes	White, European American, or European		Woman
Confident	Not Confident	Not Confident	Not Confident	Not Confident	Confident	Confident	Hesitant	Not Confident	Hesitant	Not Confident	Not Confident	Not Confident	Not Confident	Not Confident	Not Confident	Not Confident	Not Confident	Very Confident	Confident	Not Confident	Confident	Hesitant	Strongly Disagree	Strongly Disagree	Strongly Disagree	Agree	Disagree	Agree	Disagree	Strongly Disagree	Strongly Disagree	Agree	Nurse		Other		185	30 years or more	56 to 65 years old	1 to 3 years after high school (some college, Associate's degree, or technical school)	Suburban	Yes	White, European American, or European		Woman
Confident	Hesitant	Very Confident	Confident	Very Confident	Very Confident	Very Confident	Hesitant	Not Confident	Not Confident	Not Confident	Not Confident	Not Confident	Not Confident	Not Confident	Not Confident	Not Confident	Not Confident	Hesitant	Not Confident	Not Confident	Not Confident	Not Confident	Strongly Disagree	Strongly Disagree	Agree	Agree	Strongly Agree	Agree	Strongly Disagree	Disagree	Strongly Disagree	Strongly Agree	Nurse		Other	ICU		Fewer than 10 years	26 to 35 years old	1 to 3 years after high school (some college, Associate's degree, or technical school)	Suburban	Yes	White, European American, or European		Woman
Hesitant	Not Confident	Not Confident	Not Confident	Not Confident	Hesitant	Hesitant	Not Confident	Not Confident	Not Confident	Not Confident	Not Confident	Not Confident	Not Confident	Not Confident	Not Confident	Not Confident	Not Confident	Not Confident	Not Confident	Hesitant	Not Confident	Not Confident	Agree	Agree	Disagree	Disagree	Disagree	Disagree	Disagree	Disagree	Disagree	Disagree	Nurse		Prefer not to answer.		185	30 years or more	46 to 55 years old	1 to 3 years after high school (some college, Associate's degree, or technical school)	Urban	Yes	White, European American, or European		Woman
Very Confident	Confident	Confident	Hesitant	Confident	Confident	Confident	Hesitant	Hesitant	Hesitant	Hesitant	Not Confident	Not Confident	Not Confident	Hesitant	Hesitant	Not Confident	Not Confident	Confident	Not Confident	Hesitant	Hesitant	Confident	Strongly Disagree	Strongly Disagree	Agree	Disagree	Disagree	Disagree	Disagree	Agree	Disagree	Agree	Nurse		Psychiatry		170	10-19 years	56 to 65 years old	College 4 years or more (college graduate)	Rural	Yes	White, European American, or European		Woman
Confident	Hesitant	Hesitant	Not Confident	Not Confident	Confident	Confident	Hesitant	Hesitant	Confident	Confident	Confident	Confident	Confident	Confident	Confident	Confident	Hesitant	Hesitant	Confident	Confident	Confident	Confident	Disagree	Disagree	Agree	Disagree	Agree	Agree	Disagree	Strongly Disagree	Strongly Disagree	Agree	Nurse		Other	PCU	185	20-29 years	36 to 45 years old	1 to 3 years after high school (some college, Associate's degree, or technical school)	Suburban	Yes	White, European American, or European		Woman
Hesitant	Hesitant	Confident	Confident	Confident	Confident		Hesitant	Hesitant	Confident	Hesitant		Hesitant	Hesitant	Hesitant	Hesitant	Hesitant	Hesitant	Hesitant	Hesitant	Hesitant	Hesitant	Hesitant	Strongly Disagree	Strongly Disagree	Strongly Agree	Agree	Disagree	Disagree	Disagree	Strongly Disagree	Disagree	Strongly Agree	Nurse		Pediatrics		178	10-19 years	26 to 35 years old	College 4 years or more (college graduate)	Rural	Yes	White, European American, or European		Woman
Hesitant	Hesitant	Not Confident	Not Confident	Not Confident	Hesitant	Hesitant	Not Confident	Not Confident	Not Confident	Not Confident	Hesitant	Not Confident	Not Confident	Not Confident	Hesitant	Not Confident	Not Confident	Hesitant	Not Confident	Not Confident	Not Confident	Hesitant	Strongly Disagree	Disagree	Strongly Agree	Agree	Agree	Agree	Strongly Disagree	Strongly Disagree	Strongly Disagree	Strongly Agree	Nurse		Other		178	30 years or more	56 to 65 years old	1 to 3 years after high school (some college, Associate's degree, or technical school)	Rural	Yes	White, European American, or European		Woman
Confident	Confident	Very Confident	Very Confident	Very Confident	Very Confident	Very Confident	Not Confident	Hesitant	Hesitant	Confident	Not Confident	Not Confident	Not Confident	Not Confident	Not Confident	Not Confident	Not Confident	Very Confident	Not Confident	Hesitant	Not Confident	Confident	Strongly Disagree	Strongly Disagree	Strongly Agree	Strongly Disagree	Agree	Disagree	Disagree	Strongly Disagree	Strongly Disagree	Agree	Nurse		Other	endoscopy	177	30 years or more	46 to 55 years old	1 to 3 years after high school (some college, Associate's degree, or technical school)	Rural	Yes	White, European American, or European		Woman
Very Confident	Confident	Very Confident	Very Confident	Very Confident	Very Confident	Very Confident	Hesitant	Hesitant	Hesitant	Hesitant	Confident	Hesitant	Not Confident	Not Confident	Confident	Confident	Hesitant	Very Confident	Confident	Hesitant	Hesitant	Confident	Strongly Disagree	Strongly Disagree	Strongly Agree	Strongly Agree	Agree	Agree	Disagree	Disagree	Agree	Strongly Agree	Nurse		Other	Care Coordination and integrated services (Out patient case management	0	10-19 years	56 to 65 years old	1 to 3 years after high school (some college, Associate's degree, or technical school)	Rural	Yes	White, European American, or European		Woman
Confident	Hesitant	Hesitant	Not Confident	Hesitant	Hesitant	Hesitant	Hesitant	Hesitant	Hesitant	Confident	Hesitant	Hesitant	Hesitant	Hesitant	Hesitant	Hesitant	Hesitant	Confident	Hesitant	Confident	Confident	Confident	Strongly Disagree	Agree	Agree	Disagree	Agree	Agree	Strongly Disagree	Strongly Disagree	Strongly Disagree	Agree	Nurse		Other	Ortho/Neuro Trauma - 6 west GWV	187	30 years or more	56 to 65 years old	College 4 years or more (college graduate)	Urban	Yes	White, European American, or European		Woman
Hesitant	Not Confident	Not Confident	Not Confident	Very Confident	Very Confident	Very Confident	Not Confident	Not Confident	Not Confident	Not Confident	Not Confident	Not Confident	Not Confident	Not Confident	Not Confident	Not Confident	Not Confident	Not Confident	Not Confident	Not Confident	Hesitant	Not Confident	Strongly Disagree	Agree	Agree	Agree	Agree	Agree	Strongly Disagree	Strongly Disagree	Strongly Disagree	Strongly Agree	Nurse		Other	Care Access	178	30 years or more	56 to 65 years old	1 to 3 years after high school (some college, Associate's degree, or technical school)	Rural	Yes	White, European American, or European		Woman
Confident	Confident	Confident	Hesitant	Hesitant	Confident	Confident	Hesitant	Hesitant	Hesitant	Hesitant	Hesitant	Hesitant	Hesitant	Hesitant	Hesitant	Hesitant	Hesitant	Confident	Confident	Hesitant	Confident	Hesitant	Disagree	Disagree	Strongly Disagree	Agree	Agree	Agree	Disagree	Disagree	Disagree	Strongly Agree	Nurse		Prefer not to answer.			30 years or more	56 to 65 years old	1 to 3 years after high school (some college, Associate's degree, or technical school)	Rural	Yes	White, European American, or European		Man
Confident	Confident	Hesitant	Hesitant	Hesitant	Confident	Confident	Confident	Hesitant	Hesitant	Hesitant	Hesitant	Hesitant	Hesitant	Hesitant	Hesitant	Hesitant	Hesitant	Confident	Confident	Hesitant	Hesitant	Confident	Disagree	Disagree	Agree	Agree	Agree	Agree	Disagree	Disagree	Disagree	Agree	Nurse		Other		178	30 years or more	46 to 55 years old	College 4 years or more (college graduate)	Rural	Yes	White, European American, or European		Woman
Hesitant	Hesitant	Hesitant	Hesitant	Confident	Confident	Confident	Hesitant	Hesitant	Hesitant	Hesitant	Hesitant	Hesitant	Hesitant	Hesitant	Hesitant	Hesitant	Hesitant	Hesitant	Hesitant	Hesitant	Hesitant	Hesitant	Disagree	Agree	Agree	Agree	Agree	Agree	Disagree	Disagree	Disagree	Agree	Nurse		Other	Radiology	170	10-19 years	36 to 45 years old	College 4 years or more (college graduate)	Rural	Yes	White, European American, or European		Woman
Confident	Hesitant	Confident	Hesitant	Hesitant	Confident	Confident	Hesitant	Hesitant	Not Confident	Not Confident	Not Confident	Not Confident	Not Confident	Not Confident	Not Confident	Hesitant	Hesitant	Hesitant	Hesitant	Hesitant	Hesitant	Hesitant	Strongly Disagree	Disagree	Disagree	Agree	Agree	Agree	Disagree	Strongly Disagree	Strongly Disagree	Agree	Nurse		Other	Cancer Center	185	Fewer than 10 years	26 to 35 years old	College 4 years or more (college graduate)	Suburban	Yes	White, European American, or European		Woman
Confident	Confident	Hesitant	Not Confident	Confident	Confident	Confident	Hesitant	Not Confident	Not Confident	Not Confident	Not Confident	Not Confident	Not Confident	Not Confident	Not Confident	Not Confident	Not Confident	Hesitant	Not Confident	Hesitant	Hesitant	Hesitant	Disagree	Disagree	Agree	Agree	Agree	Agree	Disagree	Disagree	Strongly Disagree	Agree	Nurse		Other	Medical/surgical	170	Fewer than 10 years	18 to 25 years old	College 4 years or more (college graduate)	Rural	Yes	White, European American, or European		Woman
[truncated: 221 more rows]
